# Supplementary material for: The DnaA Protein Is Not the Limiting Factor for Initiation of Replication in Escherichia coli
Source: PLoS Genet. 2015 Jun 5;11(6):e1005276. doi: 10.1371/journal.pgen.1005276 (PMC4457925; doi:10.1371/journal.pgen.1005276)
Supplement: S7 Table — (XLSX) [file pgen.1005276.s012.xlsx]

## Sheet: Sheet1
Transcription Start	Translation Start	Translation Stop	Transcription Stop	Strand	Name	Synonym	Product	Raw Counts MG1655 Replicate 1	Raw Counts MG1655 Replicate 2	Raw Counts MG1655 Replicate 3	Normalized Counts MG1655 Replicate 1	Normalized Counts MG1655 Replicate 2	Normalized Counts MG1655 Replicate 3	RPKM MG1655	Expression MG1655	Raw Counts IF72 Replicate 1	Raw Counts IF72 Replicate 2	Raw Counts IF72 Replicate 3	Normalized Counts IF72 Replicate 1	Normalized Counts IF72 Replicate 2	Normalized Counts IF72 Replicate 3	RPKM IF72	Expression IF72	pValue MG1655 vs IF72	qValue MG1655 vs IF72
	809257	807968		-	bioA	b0774	7,8-diaminopelargonic acid synthase, PLP-dependent	28	37	25	44575	45467	35876	0	32	142	213	185	209101	261139	281071	5	194	1.73089379861031E-128	4.060676851539787E-125
	3883729	3882326		-	dnaA	b3702	chromosomal replication initiator protein DnaA, DNA-binding transcriptional dual regulator	68	60	56	105909	72492	79448	1	61	151	206	145	223061	253010	221336	4	165	3.5745054224719695E-21	5.59052648074616E-18
807961	807909	807433	807355	-	ybhB	b0773	kinase inhibitor homolog, UPF0098 family	36	46	40	55606	55839	56188	3	117	378	398	338	555336	487520	514052	31	1087	0.0	0.0
4166659			4168200	+	rrsB	b3968	16S ribosomal RNA of rrnB operon	10078	18396	1363	15520799	22034844	1903302	242	8529	4442	2947	966	6523761	3607308	1467419	72	2507	7.2284055704830305E-6	0.008478919734176594
4208147			4209688	+	rrsE	b4007	16S ribosomal RNA of rrnE operon	10078	18396	1366	15520799	22034844	1906324	242	8530	4442	2948	966	6523761	3608305	1467419	72	2507	7.229419162794375E-6	0.008478919734176594
4408346			4408304	-	-	predicted RNA	antisense: rnr	346	445	345	533595	533183	482536	327	12010	492	570	295	723019	698401	449223	425	14501	1.1048546912911443E-5	0.008639963685896748
	2719953	2722613		+	pka	b2584	protein lysine acetyltransferase	152	304	164	235360	365019	229039	2	103	320	482	201	471251	590173	305286	5	171	1.1910051662156735E-5	0.008639963685896748
3941808			3943349	+	rrsC	b3756	16S ribosomal RNA of rrnC operon	9786	17874	1336	15072252	21409173	1865023	235	8289	4312	2839	927	6333785	3474821	1407780	70	2424	1.4424449484465838E-5	0.008639963685896748
4035531			4037072	+	rrsA	b3851	16S ribosomal RNA of rrnA operon	9719	17692	1321	14967944	21191146	1844257	233	8215	4256	2834	931	6250947	3469006	1414166	70	2406	1.786137798541573E-5	0.009311731723063401
3428762			3427221	-	rrsD	b3278	16S ribosomal RNA of rrnD operon	9499	17342	1302	14630481	20772097	1817298	228	8045	4201	2773	911	6170594	3394361	1383845	68	2366	2.851928457511073E-5	0.013381248322641953
4210043			4212946	+	rrlE	b4009	23S ribosomal RNA of rrnE operon	11050	15323	1305	17018852	18354518	1821699	119	4269	3641	2972	862	5347455	3637679	1309132	34	1181	2.861710938519262E-5	0.013381248322641953
2731157			2729616	-	rrsG	b2591	16S ribosomal RNA of rrnG operon	9406	17153	1290	14486511	20546461	1800470	225	7962	4177	2755	900	6134989	3372981	1366791	68	2350	3.642796835356878E-5	0.014243335626245393
2729184			2726281	-	rrlG	b2589	23S ribosomal RNA of rrnG operon	10697	14788	1255	16474692	17712787	1751267	115	4125	3467	2860	819	5092887	3500643	1243300	33	1129	5.969391598475347E-5	0.02154491183080487
4168641			4171544	+	rrlB	b3970	23S ribosomal RNA of rrnB operon	10697	14788	1255	16475177	17713359	1751267	115	4125	3467	2860	816	5092913	3500643	1238825	33	1128	5.9952758034134355E-5	0.02154491183080487
4044055	4041999	4041415		-	mobA	b3857	molybdopterin-guanine dinucleotide synthase	271	559	369	418238	670409	515671	25	914	421	604	374	618741	740339	568518	32	1098	6.931761196364202E-5	0.021682549022227222
2528159	2528159	2527941	2527439	-	ypeB	b4546	DUF3820 family protein	91	86	81	141313	103702	113277	14	545	51	63	53	76075	77573	80443	10	356	1.2085744309706038E-4	0.03544144518821296
4037519			4040423	+	rrlA	b3854	23S ribosomal RNA of rrnA operon	10059	14146	1190	15491867	16944657	1660606	109	3912	3409	2747	794	5006728	3362645	1206167	32	1098	1.7378403800028485E-4	0.04796439448807861
2924524			2924156	-	csrB	b4408	-	59	55	62	92282	66231	86631	5	221	38	39	28	56565	48524	43954	3	134	2.564721085963192E-4	0.06685372964077388
225759			228662	+	rrlH	b0204	23S ribosomal RNA of rrnH operon	9697	13727	1167	14934409	16441874	1629295	105	3788	3341	2636	753	4907317	3227102	1143265	31	1064	3.1180994460790597E-4	0.07700064526843657
	887423	887959		+	rcdA	b0846	transcriptional regulator of csgD and ybiJI; autoregulator	31	87	33	48174	104614	46957	3	123	34	24	26	50119	30321	40596	2	75	3.354047746444586E-4	0.07868596013158999
1791244	1791244	1789808	1789603	-	ydiU	b1706	UPF0061 family protein	369	430	437	569717	516169	609875	10	393	287	388	341	422780	476094	518640	9	328	6.051709736302411E-4	0.13521248610824244
1813132	1813132	1812329		-	ydjO	b1730	uncharacterized protein	169	146	221	261394	175296	308702	8	309	74	83	131	109998	101938	199729	4	170	6.617816849778694E-4	0.14113998481437107
223771			225312	+	rrsH	b0201	16S ribosomal RNA of rrnH operon	8030	14663	1087	12367771	17563331	1516868	192	6798	3490	2340	769	5126024	2864556	1168100	57	1979	6.849720269627602E-4	0.14113998481437107
	1948151	1947411		-	yebC	b1864	UPF0082 family protein	51	83	68	79711	100510	95499	3	124	94	98	85	139036	120799	129125	5	174	9.09682581137506E-4	0.17784294461238245
2814802			2814879	+	micA	b4442	-	460	444	401	709889	532673	560424	207	7705	349	407	336	512593	499172	511069	189	6507	9.648173685185824E-4	0.18107692372356754
3426783			3423880	-	rrlD	b3275	23S ribosomal RNA of rrnD operon	8733	11579	988	13450155	13869872	1379564	91	3294	2659	2353	636	3906284	2880077	965605	26	889	0.001189376310899242	0.21463667887458626
	1201497	1201838		+	ymfI	b1143	e14 prophage; uncharacterized protein	38	44	29	58626	53055	41615	4	149	27	26	11	39677	32621	17882	2	87	0.001297540759957813	0.22548374984155775
3943704			3946607	+	rrlC	b3758	23S ribosomal RNA of rrnC operon	8828	11987	1033	13595786	14358316	1441928	94	3374	2835	2409	680	4164199	2949027	1032763	27	935	0.0013121115441992474	0.22548374984155775
4169244			4168546	-	-	predicted RNA	antisense: rrlB	9463	15961	9646	14574511	19118749	13461043	621	22486	89432	1903	51757	131338960	2329727	78557178	2757	101204	0.0016009732009272819	0.25902642271554505
4210646			4209935	-	-	predicted RNA	antisense: rrlE	9563	15942	9646	14727842	19095971	13461448	611	22137	89255	1922	51795	131078944	2353286	78614829	2704	99272	0.0016386702175053155	0.25902642271554505
2728581			2729235	+	-	predicted RNA	antisense: rrlG	8844	14865	9252	13620418	17804825	12910601	623	22562	86976	1661	50066	127731429	2033137	75990928	2852	104710	0.0016510560005952774	0.25902642271554505
3426180			3426902	+	-	predicted RNA	antisense: rrlD	9706	15708	9618	14949325	18814815	13422591	600	21755	88871	1979	51459	130515163	2423169	78105094	2651	97299	0.001751490911363696	0.25902642271554505
4038122			4037390	-	-	predicted RNA	antisense: rrlA	10472	17321	9836	16127971	20747352	13725877	636	23011	90592	2261	53218	133042213	2768022	80775218	2684	98492	0.0019383602950377252	0.2755995910399093
2042368	2042368	2042898	2043554	+	yodB	b1974	cytochrome b561 homolog	321	448	379	495267	536756	530071	26	980	374	439	383	550008	538231	581655	30	1048	0.0020912224766915727	0.288588701783437
226267			225664	-	-	predicted RNA	antisense: rrlH	7899	13497	7274	12165011	16167068	10151085	588	21237	78614	1516	45827	115451656	1856384	69556786	2809	103126	0.0021984980731298348	0.29472437026071957
2712764	2712764	2712027	2710412	-	trmN	b2575	tRNA1(Val) (adenine(37)-N6)-methyltransferase	316	373	382	487497	446794	533605	17	663	357	405	391	524863	496681	594094	21	729	0.0026213892565754666	0.3416543997736692
	233955	232597		-	mltD	b0211	putative membrane-bound lytic murein transglycosylase D	128	163	121	197836	195630	169796	3	138	200	279	160	293980	341535	242960	6	215	0.003198404961131767	0.40559232642243914
	803503	805764		+	ybhJ	b0771	putative hydratase	343	398	363	529105	477528	507522	6	223	251	282	242	369936	346020	367803	4	159	0.003633040694669272	0.44858491945758483
3949970	3949969	3948449	3948419	-	yifB	b3765	bifunctional magnesium chelatase family protein and putative transcriptional regulator	1114	1532	1312	1715962	1835109	1831103	32	1179	1459	2232	1173	2143715	2731934	1781271	43	1458	0.004007433074942004	0.4821250253237919
3421325	3421325	3422428		+	yhdY	b3270	putative amino-acid transporter subunit	127	207	170	195872	248046	237726	5	205	221	303	193	325367	370937	293824	8	298	0.0041852882749940645	0.49093431465680376
3883350			3883484	+	-	predicted RNA	antisense: dnaA	1257	1326	1261	1936321	1588403	1760903	352	13050	1563	1944	1201	2296038	2379780	1823115	470	16046	0.004934477954144274	0.5646968429474374
	3024351	3025751		+	xanQ	b2882	xanthine permease	63	78	65	98096	94276	90735	1	67	87	105	75	128244	128942	114506	2	88	0.005198797512057451	0.5807799506327038
	1903082	1903882		+	manY	b1818	mannose-specific enzyme IIC component of PTS	28	48	36	43441	57737	50738	1	63	62	61	38	91854	75153	58635	2	93	0.0053044388180548034	0.5807799506327038
1807796	1807796	1808656	1809261	+	yniA	b1725	fructosamine kinase family protein	396	426	410	610711	510854	572141	17	655	332	410	331	488029	502900	502887	16	578	0.005768587002848176	0.6151411413037192
	3566581	3564134		-	glgP	b3428	glycogen phosphorylase	190	233	213	293311	279216	297522	3	118	338	309	201	496900	378832	306280	4	160	0.006960606776097354	0.7257592665210841
3944307			3943399	-	-	predicted RNA	antisense: rrlC gltU	16793	19884	13540	25863575	23816585	18895277	684	25146	91529	6538	56153	134418562	8002525	85229160	2285	83480	0.007413722275744572	0.7561996721259464
	243543	244121		+	gmhA	b0222	D-sedoheptulose 7-phosphate isomerase	21	32	38	32877	39322	53926	1	72	53	40	36	78517	49904	55983	3	106	0.007605468792152964	0.759252331335781
1937649	1937649	1939091	1942600	+	pykA	b1854	pyruvate kinase II	329	470	345	507579	563624	482305	9	358	403	436	329	592733	534184	500017	10	375	0.008575167926982041	0.8382226648624945
4407813			4407652	-	-	predicted RNA	antisense: rnr	1688	2006	1595	2601012	2403511	2226818	404	14879	2236	2327	1348	3284904	2848249	2046589	491	16830	0.010012078184429365	0.9587075681906649
3982509			3982585	+	hisR	b3797	His tRNA	3	3	0	5234	4022	1122	1	44	4	5	4	7061	7308	7083	2	92	0.010343808987734314	0.970663035408988
	1370216	1371895		+	ycjM	b1309	alpha amylase catalytic domain family protein	1	2	0	2682	3463	0	0	1	0	0	0	0	176	0	0	0	0.0	1.0
	1526940	1527152		+	yncH	b1455	IPR020099 family protein	1	0	0	1661	0	0	0	2	0	0	0	0	0	0	0	0	0.0	1.0
	2174566	2174282		-	gatB	b2093	galactitol-specific enzyme IIB component of PTS	0	1	0	0	1449	833	0	2	0	0	0	0	0	0	0	0	0.0	1.0
	3888435	3888509		+	tnaC	b3707	tryptophanase leader peptide	0	0	0	0	0	0	0	0	0	0	0	580	0	427	0	4	0.0	1.0
	1503717	1504865		+	insQ	b1432	IS609 transposase B	37	42	40	57319	51136	56395	1	47	22	34	14	33555	42575	22470	0	28	0.001093969382813903	1.0
	2963156	2962749		-	ygdB	b2824	DUF2509 family protein	0	3	3	198	4375	4260	0	7	1	0	0	1793	0	1238	0	2	0.0011746239099219684	1.0
	544046	543261		-	allE	b0515	S-ureidoglycine aminohydrolase	11	7	5	17433	8411	8289	0	14	14	18	15	21943	22624	23447	0	28	0.0012166558469469497	1.0
	2573505	2572489		-	eutD	b2458	phosphate acetyltransferase	7	8	3	11801	9942	5259	0	8	12	16	11	18843	20226	17192	0	18	0.0013219396104363428	1.0
	2357816	2358001		+	ypaA	b4543	uncharacterized protein	1	3	3	2396	4593	4970	0	21	0	0	1	1101	339	2765	0	7	0.0013310866070195544	1.0
	2896555	2895776		-	ygcR	b2770	putative flavoprotein	5	11	8	8236	13195	12451	0	14	6	17	24	9204	21315	36444	0	28	0.0014775071319367025	1.0
2785837			2785762	-	ileY	b2652	Ile tRNA	0	0	0	0	34	0	0	0	0	0	0	0	77	0	0	0	0.0015762106000007596	1.0
	3418390	3418611		+	yhdV	b3267	putative outer membrane protein	1	2	2	1868	2960	3938	0	13	4	7	3	6352	9097	5687	0	31	0.0015788105416477069	1.0
2521173			2521248	+	valY	b2403	Val tRNA	0	0	0	173	0	990	0	5	0	2	0	1246	2950	0	0	18	0.0016017989303534486	1.0
	1706348	1706926		+	rsxB	b1628	SoxR iron-sulfur cluster reduction factor component; putative iron-sulfur protein	2	1	1	3305	1218	2311	0	3	5	4	1	8504	6027	2076	0	9	0.001659891283615893	1.0
	752795	752229		-	ybgD	b0719	putative fimbrial-like adhesin protein	4	6	4	6869	7486	6473	0	12	1	2	2	1827	3282	3410	0	5	0.0017432600222650654	1.0
	1855971	1854991		-	ydjG	b1771	alpha-Keto reductase, NADH-dependent; can use methylglyoxal as substrate	1	0	0	2647	762	1304	0	1	3	0	4	5310	0	6568	0	4	0.0018254574730202343	1.0
	2434741	2434082		-	dedA	b2317	DedA family inner membrane protein	29	26	22	44687	31155	31954	1	54	11	19	12	16786	23268	19696	0	30	0.0018261959693016746	1.0
	2827737	2828516		+	srlD	b2705	sorbitol-6-phosphate dehydrogenase	14	25	18	21638	30665	25844	0	33	26	44	26	39241	54920	39506	1	57	0.0018779384011076532	1.0
	1645633	1645346		-	relE	b1563	Qin prophage; toxin of the RelE-RelB toxin-antitoxin system	2	5	1	4369	6424	1956	0	14	1	0	1	2254	445	1945	0	5	0.0018784608507796962	1.0
	4260321	4260575		+	yjbL	b4047	uncharacterized protein	1	0	0	2197	326	0	0	3	0	0	0	0	0	785	0	1	0.0019325790997727337	1.0
	1161885	1162244		+	hinT	b1103	purine nucleoside phosphoramidase, dadA activator protein	0	3	1	1176	4505	1725	0	6	0	0	0	119	1082	1212	0	2	0.002034010625946076	1.0
	3521972	3521433		-	hofN	b3394	DNA catabolic putative fimbrial assembly protein	4	7	7	6393	8901	10783	0	16	4	3	0	5976	4280	968	0	6	0.0021237409075123884	1.0
	1967437	1967048		-	cheY	b1882	chemotaxis regulator transmitting signal to flagellar motor component	0	1	0	1038	1293	1040	0	2	0	0	0	0	0	1029	0	0	0.0021819130007804913	1.0
	1420241	1419765		-	racR	b1356	Rac prophage; putative DNA-binding transcriptional regulator	8	5	4	12908	6962	5672	0	17	0	5	2	1229	6133	3672	0	7	0.002275757110712427	1.0
	1649609	1649797		+	dicB	b1575	Qin prophage; cell division inhibition protein	0	0	0	0	0	718	0	1	0	0	1	0	714	1648	0	4	0.002346750025366754	1.0
	1946180	1946115		-	yobI	b4677	uncharacterized protein	0	0	1	830	598	1667	0	15	1	2	1	2740	3056	2616	1	42	0.002597323280891636	1.0
	196546	197898		+	rseP	b0176	inner membrane zinc RIP metalloprotease; RpoE activator, by degrading RseA; cleaved signal peptide endoprotease	5	12	10	9024	15094	14226	0	9	15	16	18	23326	19943	28332	0	17	0.0026419959320195373	1.0
	573730	573870		+	ylcG	b4509	uncharacterized protein, DLP12 prophage	2	3	0	3339	4777	1238	0	22	1	0	1	1468	219	1779	0	8	0.0027453085025285562	1.0
	2735034	2734303		-	yfiH	b2593	UPF0124 family protein	3	5	3	4793	6376	4805	0	7	1	2	0	2928	3381	174	0	2	0.0033551814962565476	1.0
	997868	998407		+	elfA	b0938	laminin-binding fimbrin subunit	2	3	3	3642	4484	4367	0	7	0	1	2	0	1344	3393	0	2	0.0034376230388671234	1.0
	1512817	1513830		+	ydcT	b1441	putative spermidine/putrescine transporter subunit	0	3	4	1341	4573	6242	0	3	6	7	4	10228	9189	7379	0	8	0.0037067779021247717	1.0
	2611457	2611870		+	hyfJ	b2490	putative processing element hydrogenase 4	6	4	2	10572	5206	3649	0	15	1	4	0	1622	5291	1421	0	6	0.0038757121500310006	1.0
	3461468	3461977		+	gspH	b3329	putative general secretory pathway component, cryptic	6	15	6	10356	18919	8380	0	24	21	16	11	31702	19957	17480	1	45	0.003906849778638531	1.0
	1342658	1342984		+	yciH	b1282	initiation factor function partial mimic, SUI1 family	11	9	10	18143	11140	15217	1	45	5	5	4	8495	6579	7100	0	22	0.003935792549857898	1.0
	1764386	1764018		-	sufA	b1684	Fe-S cluster assembly protein	6	7	6	10105	9398	8892	0	25	2	5	2	3415	6154	3384	0	11	0.004087431745708253	1.0
	4611396	4612001		+	osmY	b4376	periplasmic protein	6	5	10	10494	6233	14111	0	16	14	13	13	20978	16597	21004	0	32	0.004164917427040186	1.0
2059851			2059926	+	asnU	b1986	Asn tRNA	0	2	2	510	2660	2799	0	26	0	0	0	213	1124	662	0	8	0.004276235487852777	1.0
	1856928	1855981		-	ydjH	b1772	putative kinase	0	1	1	1081	1599	2328	0	1	1	3	2	2399	4803	4544	0	4	0.004415339863694809	1.0
	729134	729340		+	ybfA	b0699	DUF2517 family protein	0	2	1	0	2490	2080	0	7	0	1	0	0	1464	0	0	2	0.0045069356817082325	1.0
	1647850	1647620		-	dicC	b1569	Qin prophage; DNA-binding transcriptional regulator for DicB	0	0	1	1142	163	1965	0	4	0	0	0	196	0	924	0	1	0.004510714392742202	1.0
	1121487	1121242		-	dinI	b1061	DNA damage-inducible protein I	5	2	2	8392	2756	3913	0	20	2	0	0	4371	990	889	0	8	0.0050230251882922815	1.0
	2128314	2127193		-	gmd	b2053	GDP-D-mannose dehydratase, NAD(P)-binding	21	26	22	33708	31917	31079	0	28	11	17	12	16623	20962	18309	0	16	0.00522047782907239	1.0
	1040445	1040537		+	cbdX	b4592	putative cytochrome bd-II oxidase subunit	1	3	2	1609	4253	4045	0	35	1	1	0	2023	1471	401	0	13	0.005525732165917657	1.0
	385232	386194		+	tauA	b0365	taurine transporter subunit	15	15	13	24225	19075	19436	0	21	5	8	9	8777	10661	13991	0	11	0.005580291475019348	1.0
	572368	572469		+	ylcH	b4588	uncharacterized protein, DLP12 prophage	1	0	1	2708	1109	1808	0	18	0	1	0	0	1924	0	0	6	0.005718836449477471	1.0
	3744328	3744801		+	yiaM	b3577	2,3-diketo-L-gulonate TRAP transporter small permease protein	4	4	0	6324	5818	850	0	9	0	0	2	905	785	3515	0	3	0.005778130916137441	1.0
	1418229	1418008		-	kilR	b1352	Rac prophage; inhibitor of ftsZ, killing protein	0	0	1	441	666	1700	0	4	0	0	0	0	997	0	0	1	0.005853111628425217	1.0
	2803502	2804461		+	nrdF	b2676	ribonucleoside-diphosphate reductase 2, beta subunit, ferritin-like protein	9	13	14	14898	16299	19643	0	17	16	25	21	23531	31376	31873	0	30	0.006123694577133758	1.0
	3096383	3096673		+	yggU	b2953	UPF0235 family protein	4	2	4	7172	2933	5862	0	18	0	2	1	1366	2815	2721	0	7	0.006639502183922052	1.0
	4474862	4475314		+	tabA	b4252	biofilm modulator regulated by toxins; DUF386 family protein, cupin superfamily	1	2	3	2206	3382	4756	0	7	3	3	8	5105	4789	12212	0	16	0.006746937648807669	1.0
	622189	621185		-	fepD	b0590	iron-enterobactin transporter subunit	4	4	6	6160	5737	9644	0	7	1	2	2	1852	3516	4527	0	3	0.006803016003120843	1.0
	2844752	2844210		-	hycF	b2720	formate hydrogenlyase complex iron-sulfur protein	5	2	6	8591	3457	8818	0	12	8	14	7	12670	17686	11051	0	25	0.007046408735235075	1.0
	1770615	1770971		+	ydiL	b1689	putative HTH domain DNA-binding protein	2	4	4	3417	5512	5589	0	13	1	3	0	1921	4258	0	0	5	0.007288736178129515	1.0
	335280	335885		+	yahD	b0318	ankyrin repeat protein	2	2	1	3945	2640	2022	0	4	0	1	0	0	2235	1212	0	1	0.007438019243291034	1.0
	1959266	1958520		-	cutC	b1874	copper homeostasis protein	1	4	5	3010	5873	7678	0	7	0	3	1	1169	4478	1622	0	3	0.0074920103838844645	1.0
	1645274	1645119		-	hokD	b1562	Qin prophage; small toxic polypeptide	3	2	1	4974	3239	1469	0	20	0	1	0	1041	2030	828	0	8	0.007556213638868931	1.0
	1529922	1530404		+	ydcD	b1457	uncharacterized protein	1	3	1	1790	4750	2138	0	5	3	1	7	4704	2242	11819	0	12	0.007732019301730543	1.0
	1537309	1536614		-	narW	b1466	nitrate reductase 2 (NRZ), delta subunit (assembly subunit)	1	1	0	1998	2048	1015	0	2	2	2	3	3637	3119	4596	0	5	0.0078020016745395104	1.0
	2015868	2016554		+	fliH	b1940	negative regulator of FliI ATPase activity	2	4	6	3218	5961	8818	0	8	3	0	1	4807	1195	2093	0	3	0.007978297216879433	1.0
	1810211	1810801		+	ydjM	b1728	inner membrane protein regulated by LexA	1	3	2	2214	3872	3104	0	5	2	6	4	4175	8298	7187	0	11	0.008508311271374532	1.0
	2869519	2868893		-	pcm	b2743	L-isoaspartate protein carboxylmethyltransferase type II	5	7	7	8600	8745	10445	0	14	4	4	0	7086	5454	881	0	7	0.008529933569382525	1.0
	3317526	3316039		-	nusA	b3169	transcription termination/antitermination L factor	32	36	35	50354	43385	49161	0	32	52	57	39	76818	70081	60057	1	46	0.008702309430900676	1.0
	1969364	1968504		-	cheR	b1884	chemotaxis regulator, protein-glutamate methyltransferase	2	4	2	4300	5839	3269	0	5	0	1	2	0	1846	3829	0	2	0.008930645311218276	1.0
	4142221	4139720		-	frwA	b3947	putative PTS enzyme, Hpr component/enzyme I component/enzyme IIA component	48	51	53	74294	61433	74015	0	27	40	32	32	59332	39745	48717	0	19	0.008980032938095574	1.0
	2669032	2670393		+	hcaE	b2538	3-phenylpropionate dioxygenase, large (alpha) subunit	5	12	7	8228	14788	10279	0	8	3	4	3	5293	5447	5879	0	4	0.009131753100507903	1.0
	1829734	1828256		-	astD	b1746	succinylglutamic semialdehyde dehydrogenase	1	3	1	1765	3940	1700	0	1	4	4	2	5925	5419	4457	0	3	0.009417106649773705	1.0
	1357110	1355467		-	sapA	b1294	antimicrobial peptide transport ABC transporter periplasmic binding protein	67	101	70	104585	121757	98654	1	65	52	64	54	76656	79087	82187	1	48	0.00955038156208022	1.0
	1304754	1305767		+	oppD	b1246	oligopeptide transporter subunit	3	14	4	5381	17034	6101	0	9	9	13	14	13464	16745	21938	0	17	0.010289147543186836	1.0
	1065585	1066826		+	agp	b1002	glucose-1-phosphatase/inositol phosphatase	17	17	22	27323	21205	30839	0	21	8	17	7	12508	21903	11967	0	12	0.010330703266570216	1.0
	4354717	4353200		-	lysU	b4129	lysine tRNA synthetase, inducible	24	28	22	38267	34190	31847	0	22	24	51	37	35783	62872	56882	1	34	0.010530737551366692	1.0
	4376553	4376699		+	ecnB	b4411	entericidin B membrane lipoprotein	0	1	1	969	1789	1519	0	9	2	1	3	3159	1223	5137	0	21	0.010681379934600464	1.0
	4055278	4053869		-	glnG	b3868	fused DNA-binding response regulator in two-component regulatory system with GlnL: response regulator/sigma54 interaction protein	47	76	60	72849	92071	84410	1	58	35	56	32	52604	68878	49066	1	40	0.010823125314320744	1.0
	1362743	1364230		+	puuC	b1300	gamma-glutamyl-gamma-aminobutyraldehyde dehydrogenase; succinate semialdehyde dehydrogenase	2	1	1	4005	1830	1775	0	1	2	7	2	3176	9487	3332	0	3	0.01108578945167351	1.0
	142779	143705		+	yadG	b0127	putative ABC superfamily transporter ATP-binding subunit	15	6	6	24415	8180	9693	0	15	5	6	4	7658	7782	7126	0	8	0.011088518597389688	1.0
	63264	60358		-	rapA	b0059	RNA polymerase remodeling/recycling factor ATPase; RNA polymerase-associated, ATP-dependent RNA translocase	55	86	70	85205	103593	98117	0	32	66	119	79	96985	146621	120315	1	41	0.011122484924817301	1.0
	2798495	2798091		-	stpA	b2669	DNA binding protein, nucleoid-associated	82	94	74	127020	112596	104400	7	283	71	70	49	104610	86473	74790	6	218	0.011192249099636443	1.0
	4375657	4374629		-	epmB	b4146	EF-P-Lys34 lysylation protein; weak lysine 2,3-aminomutase	68	68	73	105667	82121	102212	2	93	77	111	76	113883	136547	116852	3	118	0.01121422533387628	1.0
3427033			3426958	-	alaU	b3276	Ala tRNA	0	0	0	8	176	511	0	3	0	0	0	153	665	1133	0	8	0.011226388465643944	1.0
4037260			4037335	+	alaT	b3853	Ala tRNA	0	0	0	8	176	511	0	3	0	0	0	153	665	1133	0	8	0.011226388465643944	1.0
121551	121551	120178	120042	-	aroP	b0112	aromatic amino acid transporter	374	433	356	577245	519688	497481	10	386	413	439	333	607359	537587	506550	11	400	0.011379996909530917	1.0
	4240325	4240735		+	psiE	b4030	phosphate starvation inducible protein	11	14	10	17658	17483	14507	1	40	15	29	15	22882	35578	23517	1	66	0.01169571023745495	1.0
	1245160	1245600		+	ycgY	b1196	uncharacterized protein	2	5	4	4542	6744	6481	0	13	0	0	4	221	502	7571	0	6	0.01181643775923871	1.0
	2575457	2574978		-	eutP	b2461	putative P-loop NTPase ethanolamine utilization protein	2	4	2	3858	5008	4070	0	8	6	6	6	8837	7640	9900	0	18	0.012090791398165464	1.0
	819048	819293		+	moaD	b0784	molybdopterin synthase, small subunit	1	1	0	2111	2150	536	0	6	2	2	2	3662	2652	4143	0	14	0.012118748946112121	1.0
	4411979	4412377		+	yjfL	b4184	UPF0719 family inner membrane protein	0	1	0	865	2218	1040	0	3	3	3	0	4900	4174	0	0	7	0.012251470257421442	1.0
	1323220	1324101		+	yciV	b1266	PHP domain protein	18	24	26	27824	28875	36289	0	35	32	37	32	48360	45305	48770	1	53	0.012429804299292687	1.0
	3015160	3015738		+	mocA	b2877	CTP:molybdopterin cytidylyltransferase	8	5	5	12467	6227	8174	0	15	11	8	14	16547	10746	21859	0	28	0.012465060824193012	1.0
	3884336	3884476		+	rpmH	b3703	50S ribosomal subunit protein L34	1	1	6	2517	1476	9000	0	30	5	9	4	7923	11121	7370	1	62	0.012666967122804467	1.0
	2773318	2775021		+	yfjW	b2642	CP4-57 prophage; putative inner membrane protein	7	7	2	12026	9214	3112	0	4	1	5	2	2348	6480	3192	0	2	0.013395380578064515	1.0
3982375			3982451	+	argX	b3796	Arg tRNA	1	2	1	2656	2967	1907	0	32	3	5	2	4994	6402	4187	1	67	0.013440776273764353	1.0
	1777196	1778347		+	ydiO	b1695	putative acyl-CoA dehydrogenase	14	16	7	21889	20144	10106	0	15	9	5	6	13225	6437	9412	0	8	0.013582529414339272	1.0
	2426788	2426006		-	hisJ	b2309	histidine/lysine/arginine/ornithine transporter subunit	4	14	7	7120	16829	10593	0	14	4	8	0	6830	9826	1369	0	7	0.013851890522883237	1.0
	1682159	1682878		+	rstA	b1608	response regulator of RstAB two-component system, low Mg-responsive via PhoQP	8	11	9	13177	13352	13723	0	18	12	17	18	19065	20905	27520	0	31	0.014093173913573617	1.0
	3855611	3855114		-	yidF	b3674	putative Cys-type oxidative YidJ-maturating enzyme	121	92	105	186528	111290	147758	7	298	69	89	72	101886	109777	109455	6	214	0.014231211119917408	1.0
	3994522	3994725		+	yifL	b4558	putative lipoprotein	2	6	5	4412	8050	7860	0	33	2	2	2	3637	2497	3768	0	16	0.014654435430278398	1.0
	1165143	1165685		+	ycfP	b1108	putative UPF0227 family esterase	6	14	6	10131	17394	8463	0	22	4	6	3	5985	7513	5539	0	11	0.014655941570064168	1.0
	1213107	1212703		-	ycgX	b1161	DUF1398 family protein	13	9	12	21050	10854	17380	1	40	6	7	5	9904	8666	8862	0	22	0.014713757263978439	1.0
3322158			3322072	-	leuU	b3174	Leu tRNA	0	1	0	1090	1456	454	0	11	1	3	1	1511	3707	1823	0	26	0.015097916466382932	1.0
	2754298	2754008	2750772	-	ratB	b2618	UPF0125 family protein	77	103	84	119276	123669	117793	11	413	67	78	62	99146	96108	94303	9	331	0.01527247070956867	1.0
	3101623	3100904		-	yggN	b2958	DUF2884 family putative periplasmic protein	54	81	74	84685	97631	104260	3	132	67	111	80	99060	137035	122147	4	165	0.015420985554128358	1.0
	3367827	3368954		+	yhcG	b3220	DUF1016 family protein in the PD-(D/E)XK nuclease superfamily	46	49	35	71370	59398	50202	1	53	30	29	32	44458	36087	49511	1	38	0.015529593161717557	1.0
	2575003	2574302		-	eutQ	b2460	RmlC-like cupin domain protein	4	7	6	6315	8534	9718	0	11	9	16	6	14489	20233	10354	0	21	0.01575733455335098	1.0
3648063			3648146	+	agrA	b4712	-	0	0	0	519	0	693	0	4	1	0	0	1835	1188	314	0	13	0.01599627562994745	1.0
	2987536	2988168		+	yqeH	b2846	putative LuxR family transcriptional regulator	1	7	0	2872	8724	1081	0	6	0	3	0	0	4315	1308	0	2	0.016165461929260192	1.0
	425011	426081		+	queA	b0405	S-adenosylmethionine:tRNA ribosyltransferase-isomerase	79	77	70	122538	92915	98191	2	97	44	68	52	64916	84421	80050	2	71	0.016165981098971542	1.0
	4032492	4033106		+	yigZ	b3848	UPF0029 family protein	23	36	30	35871	43956	42977	1	66	44	53	28	65078	65397	42890	2	93	0.01619821514841842	1.0
	1773789	1774655		+	ydiB	b1692	quinate/shikimate 5-dehydrogenase, NAD(P)-binding	5	3	3	8184	3708	4632	0	6	3	2	0	5140	2723	0	0	3	0.01647784855641978	1.0
781147			781222	+	lysY	b0747	Lys tRNA	2	0	1	3114	517	1956	0	24	3	2	1	5780	3643	2172	1	50	0.016535328814000144	1.0
4427422	4427422	4426628	4425036	-	yjfZ	b4204	uncharacterized protein	1364	1506	1358	2101436	1804825	1895714	65	2432	1712	1449	1394	2514241	1774389	2116329	77	2685	0.01678010095110904	1.0
	1425377	1425640		+	ynaK	b1365	Rac prophage; conserved protein	2	2	2	4455	2694	3988	0	14	4	6	4	7231	7902	6934	0	27	0.016791469978252416	1.0
3081913	3081913	3082671	3083692	+	loiP	b2936	Phe-Phe periplasmic metalloprotease, OM lipoprotein; low salt-inducible; heat shock protein that binds Era	377	406	423	582081	486981	591652	19	729	371	345	336	545474	422730	510205	18	649	0.016933378253062917	1.0
	1987959	1987873		-	azuC	b4663	acid-inducible small membrane-associated protein	1	3	2	1721	4171	3839	1	37	1	0	0	1980	1068	1125	0	15	0.017175759132930263	1.0
264007	264007	263690	263670	-	yafW	b0246	CP4-6 prophage; antitoxin of the YkfI-YafW toxin-antitoxin system	386	428	392	594843	512753	547238	46	1734	440	507	346	647592	621146	525523	54	1880	0.01758516492464708	1.0
	2851001	2851873		+	hypB	b2727	GTP hydrolase involved in nickel liganding into hydrogenases	14	10	12	22426	13066	17347	0	20	27	18	14	40027	22907	21475	0	32	0.01778575316650047	1.0
	2892214	2892579		+	queD	b2765	6-pyruvoyl tetrahydrobiopterin synthase (PTPS)	5	4	5	7821	5716	7571	0	19	2	2	2	3782	2872	3925	0	9	0.018033841208183632	1.0
2766843			2766714	-	-	predicted RNA	antisense: rnlA	1580	1735	1390	2434616	2078188	1940203	448	16546	1546	2150	1308	2271875	2631722	1986549	519	17667	0.01844466157714518	1.0
3110366			3110441	+	pheV	b2967	Phe tRNA	2	4	0	3149	4947	743	1	38	4	3	4	6634	4570	6533	2	77	0.0187356292447136	1.0
4409005			4408971	-	-	predicted RNA	antisense: rnr	297	367	252	457881	439934	351977	324	11902	429	459	216	631164	562235	328881	425	14497	0.019013437080249104	1.0
	527581	527949		+	ybbC	b0498	putative immunity protein	0	1	3	294	1878	4467	0	5	1	0	0	1571	367	837	0	2	0.019029733343647777	1.0
	3510976	3509813		-	yhfX	b3381	putative pyridoxal 5'-phosphate binding protein	3	4	2	5554	5417	3269	0	4	5	10	4	8179	13165	6550	0	7	0.019172934408358162	1.0
	1126157	1126804		+	yceH	b1067	UPF0502 family protein	1	6	6	3071	8275	9165	0	10	1	1	3	2450	1952	5914	0	5	0.019401620492525744	1.0
	1848676	1848125		-	ydjA	b1765	putative oxidoreductase	3	2	4	5814	2443	6035	0	8	1	1	2	1562	1789	3393	0	4	0.019441959428170452	1.0
	1830765	1829731		-	astA	b1747	arginine succinyltransferase	7	4	5	10823	5131	7711	0	7	3	1	3	5737	1620	4710	0	3	0.019518395544936114	1.0
	2537342	2537716		+	yfeK	b2419	uncharacterized protein	11	13	9	18437	15850	13574	1	42	6	6	6	8999	8270	9935	0	24	0.019548226998905682	1.0
	546680	548347		+	fdrA	b0518	putative NAD(P)-binding acyl-CoA synthetase	5	11	9	7856	14148	13813	0	7	19	8	13	29149	10279	20603	0	11	0.019777429847594556	1.0
	4093438	4093124		-	rhaM	b3901	L-rhamnose mutarotase	11	17	9	17035	20477	12740	1	53	15	25	17	23224	30732	26256	2	84	0.019790488573388908	1.0
	2980635	2979943		-	ygeA	b2840	Asp/Glu_racemase family protein	33	41	58	50891	49326	82164	2	87	28	31	34	41854	38825	52616	1	64	0.019808961505992855	1.0
	4341628	4340720		-	melR	b4118	melibiose operon transcriptional regulator; autoregulator	83	91	56	128508	109622	79374	3	116	49	70	52	72276	85765	79021	2	86	0.01999447440685885	1.0
	1968501	1967452		-	cheB	b1883	fused chemotaxis regulator: protein-glutamate methylesterase in two-component regulatory system with CheA	2	3	0	3841	3763	850	0	2	2	2	6	3731	3402	9699	0	5	0.020275092624489184	1.0
	2151185	2151646		+	yegJ	b2071	uncharacterized protein	0	0	0	0	0	1106	0	0	0	2	0	0	2879	0	0	2	0.020856726298032438	1.0
	2320043	2321869		+	atoS	b2219	sensory histidine kinase in two-component regulatory system with AtoC	51	91	82	79235	110181	115655	1	55	84	116	70	123710	142674	107362	2	68	0.021009789208889712	1.0
1350262			1351097	+	-	predicted RNA	antisense: fabI	29479	26540	26151	45399627	31789573	36492122	1216	45327	21139	23244	18518	31045047	28449048	28107527	1014	34928	0.02109609909546423	1.0
	1314020	1314658		+	ompW	b1256	outer membrane protein W	73	64	56	112744	77160	78664	3	140	92	77	70	136304	94319	106271	5	175	0.02127243520019176	1.0
1405751			1405656	-	mcaS	b4426	-	5	5	4	8989	6880	6622	2	78	3	2	2	4772	3650	3096	1	39	0.021378067469678796	1.0
	757689	758405		+	sdhB	b0724	succinate dehydrogenase, FeS subunit	19	9	11	30186	11827	15919	0	26	20	18	24	30558	22037	37691	1	41	0.021398034833902457	1.0
	1316035	1315856		-	yciG	b1259	KGG family protein	0	1	0	103	1558	0	0	3	0	2	0	392	2766	1203	0	8	0.02212589821681646	1.0
195666			195527	-	-	predicted RNA	antisense: ispU	1933	1943	1768	2978421	2327936	2467327	499	18508	2116	2147	1510	3108862	2627810	2292786	556	19117	0.022294714342192563	1.0
	1908766	1908623		-	mgrB	b1826	regulatory peptide for PhoPQ, feedback inhibition	3	1	2	4897	1633	3211	0	22	3	5	4	4721	7145	7100	1	43	0.023112972793011007	1.0
	1570489	1568954		-	gadC	b1492	glutamate:gamma-aminobutyric acid antiporter	84	90	72	130359	107880	101378	1	73	56	79	59	82470	97233	90352	1	58	0.023250390374880713	1.0
	4312991	4312101		-	alsR	b4089	d-allose-inducible als operon transcriptional repressor; autorepressor; repressor of rpiR	5	7	6	8712	8534	9520	0	10	7	20	7	10536	25348	10877	0	17	0.02361262154135742	1.0
	1782681	1782974		+	ydiT	b1700	putative 3Fe-4S ferredoxin-type protein	4	3	2	6722	4484	2989	0	16	7	3	7	11279	4563	11479	0	30	0.02374985820326874	1.0
	2111019	2110138		-	rfbA	b2039	glucose-1-phosphate thymidylyltransferase	9	15	11	14466	18415	15589	0	18	17	20	17	25017	25214	26448	0	28	0.02385371612830199	1.0
	71351	72115		+	yabI	b0065	DedA family inner membrane protein	55	71	56	84755	85531	79159	2	108	32	47	47	47318	58613	71737	2	77	0.023862805772984642	1.0
	202101	202556		+	fabZ	b0180	(3R)-hydroxymyristol acyl carrier protein dehydratase	2	2	4	4135	3375	6382	0	10	5	6	7	7914	7923	10903	0	19	0.02386967865206921	1.0
	2597618	2596905		-	purC	b2476	phosphoribosylaminoimidazole-succinocarboxamide synthetase	10	14	10	16603	17469	15209	0	23	11	19	24	17289	23360	37177	1	36	0.02400162999016477	1.0
	4062247	4063512		+	yihN	b3874	MFS transporter family protein	8	14	3	12406	17054	5490	0	9	10	15	14	15761	19575	22697	0	15	0.024179989965563017	1.0
	3010028	3011413		+	hyuA	b2873	D-stereospecific phenylhydantoinase	31	45	26	49212	54879	37527	0	34	45	56	38	66282	68963	58635	1	46	0.02515561953894949	1.0
4639531	4640402	4640542	4640666	+	yjjY	b4402	uncharacterized protein	1839	2125	1703	2832237	2546168	2377483	497	18335	1847	2227	1596	2713695	2726862	2422627	542	18589	0.025356306879771022	1.0
4051036			4051280	+	csrC	b4457	-	9	7	14	14699	8656	19808	1	58	4	7	5	7061	9090	8653	0	33	0.025542162620003764	1.0
	4363308	4362733		-	yjdC	b4135	putative transcriptional regulator	2	2	5	3581	3566	7480	0	8	5	10	4	7940	13257	6725	0	16	0.02554332155748318	1.0
	1498651	1498875		+	ydcH	b1426	DUF465 family protein	3	4	3	4654	5689	4260	0	21	0	3	0	1135	4513	1482	0	10	0.02557168996997793	1.0
	3761955	3761347		-	yibF	b3592	glutathione S-transferase homolog	5	2	2	8349	3538	3319	0	8	4	7	9	5934	9140	13790	0	15	0.0257232781639101	1.0
217166			217654	+	-	predicted RNA	antisense: proS	7943	8485	8187	12233604	10163576	11424927	622	23055	6878	7169	6565	10101536	8774389	9965273	568	19659	0.025793874492879575	1.0
	1795152	1794172		-	btuC	b1711	vitamin B12 transporter subunit: membrane component of ABC superfamily	9	19	10	14509	22961	14903	0	17	22	25	10	33674	31666	16416	0	27	0.025880336361197548	1.0
	2791273	2792721		+	gabD	b2661	succinate-semialdehyde dehydrogenase I, NADP-dependent	6	7	2	10529	9541	2799	0	5	11	7	9	16504	9472	14898	0	9	0.02588526547916989	1.0
1049399	1049833	1050108		+	insA	b4516	IS1 repressor TnpA	1236	1870	1593	1904827	2240295	2223020	210	7690	1550	1818	1409	2276596	2226204	2138852	233	8021	0.025914124544002222	1.0
952286			952891	+	-	predicted RNA	antisense: pflB	8680	8916	8282	13368048	10679944	11556997	528	19584	7433	7332	6658	10917255	8973908	10105704	476	16499	0.025965277609625664	1.0
3717207	3717310	3718284	3719089	+	ghrB	b3553	glyoxylate/hydroxypyruvate reductase B	337	371	378	520228	445419	527751	13	510	374	397	358	550273	487088	544391	15	540	0.02604908818811547	1.0
1287236			1287066	-	rttR	b4425	-	3	3	6	5260	4750	9627	1	38	1	3	2	2877	3947	3288	0	19	0.02609819548172142	1.0
	2290500	2291147		+	narP	b2193	response regulator in two-component regulatory system with NarQ or NarX	33	49	43	52223	58915	60308	2	88	30	29	30	44057	35521	45699	1	64	0.026373618688279945	1.0
	2632535	2630958		-	guaA	b2507	GMP synthetase (glutamine aminotransferase)	44	43	44	68463	51817	62389	1	38	25	42	31	37448	51503	47217	0	28	0.02688521340537073	1.0
658947	658947	659150		+	tatE	b0627	TatABCE protein translocation system subunit	32	56	56	49723	67238	78259	8	318	39	34	30	57735	42171	45952	6	238	0.027036052832672932	1.0
	3248439	3248822		+	mzrA	b3096	modulator of EnvZ/OmpR regulon	12	17	10	18896	21498	14804	1	47	18	31	13	26946	38287	20088	2	74	0.02724374505883138	1.0
	3039743	3038847		-	xerD	b2894	site-specific tyrosine recombinase	4	10	9	7639	12835	12732	0	12	11	18	10	16333	22051	16652	0	20	0.027332062048976577	1.0
	1190447	1189776		-	phoP	b1130	response regulator in two-component regulatory system with PhoQ	12	30	12	19363	36831	18000	1	36	32	23	22	47233	28425	34586	1	54	0.02766280165188467	1.0
	1916258	1917541		+	yebS	b1833	inner membrane protein	61	71	38	94826	85395	53959	1	60	70	84	70	102860	103035	106463	2	81	0.027975786529458396	1.0
	1712769	1714271		+	dtpA	b1634	dipeptide and tripeptide permease A	34	34	39	53703	41363	54454	0	33	22	31	21	32462	38365	32370	0	22	0.02800848819835932	1.0
3946872			3946948	+	aspT	b3760	Asp tRNA	1	0	0	1868	1095	1255	0	18	0	0	0	776	884	0	0	7	0.02853139591369276	1.0
	3995583	3996290		+	yigA	b3810	DUF484 family protein	5	8	1	8548	9970	1403	0	9	1	3	2	1673	4195	4535	0	4	0.028845400345759803	1.0
	1538853	1537309		-	narY	b1467	nitrate reductase 2 (NRZ), beta subunit	4	4	4	6220	4872	5878	0	3	1	4	1	1878	5228	1561	0	1	0.029206500477896864	1.0
	3583677	3584180	3584198	+	insB1	b3445	IS1 transposase B	1506	1979	1639	2320297	2371532	2287738	125	4616	1677	1863	1499	2463387	2281344	2275724	134	4643	0.029275735614426562	1.0
	721733	721056		-	kdpE	b0694	response regulator in two-component regulatory system with KdpD	1	3	1	3002	4369	1808	0	4	1	5	6	1468	6791	9307	0	8	0.03003246343747002	1.0
	610079	609459		-	entD	b0583	phosphopantetheinyltransferase component of enterobactin synthase multienzyme complex	47	46	46	73758	56029	64635	2	104	29	49	27	43656	60134	42271	2	78	0.030064478844460427	1.0
	20314	19811	17472	-	insB1	b0021	IS1 transposase B	1479	1937	1619	2278300	2320600	2259433	123	4535	1672	1833	1461	2456113	2243523	2218082	132	4575	0.03016184929498592	1.0
	3389126	3388194		-	aaeA	b3241	p-hydroxybenzoic acid efflux system component	82	109	84	127262	130617	118569	3	134	59	93	67	87346	114453	102948	3	108	0.03026190904307896	1.0
	3184840	3185130		+	yqiC	b3042	BMFP family putative fusogenic protein	8	4	7	13055	5948	10329	0	33	3	3	4	5233	4145	6734	0	18	0.030699062395815654	1.0
2736884			2736742	-	-	predicted RNA	antisense: bamD	1733	2088	1928	2669034	2501905	2690950	497	18326	1800	2242	1575	2644637	2744315	2391416	529	18136	0.03095670535665314	1.0
2635823	2635814	2635599	2634214	-	yfgJ	b2510	DUF1407 family protein	249	247	236	384547	296842	330121	42	1560	162	196	186	239301	240884	282885	34	1177	0.031077221329086677	1.0
2462620			2462034	-	-	predicted RNA	antisense: fadL	8518	8583	8243	13118498	10280781	11503798	534	19820	7144	7647	6781	10492059	9359617	10293623	495	17118	0.031332568083286015	1.0
	25826	26275		+	fkpB	b0028	FKBP-type peptidyl-prolyl cis-trans isomerase (rotamase)	5	1	2	8539	1878	4144	0	10	1	3	0	2860	4414	0	0	5	0.031368690941582004	1.0
	2294904	2292961		-	ccmF	b2196	heme lyase, CcmF subunit	2	6	4	3469	7642	6489	0	3	10	4	7	15582	5284	11034	0	5	0.03152941900379826	1.0
	2312749	2311646		-	ompC	b2215	outer membrane porin protein C	50	70	94	77833	84905	131434	2	88	87	94	72	129098	115925	109385	3	107	0.03170311846827738	1.0
	929195	927474		-	cydC	b0886	fused glutathione, cysteine exporter subunits of ABC superfamily: membrane component/ATP-binding component	26	25	22	40413	30202	31921	0	19	36	35	32	53919	43310	48900	0	28	0.031784485584237465	1.0
	3856415	3856864		+	yidI	b3677	inner membrane protein	17	30	16	26241	36375	22326	1	62	36	20	30	52996	24690	46903	2	92	0.032115354869389635	1.0
	4412387	4413025		+	yjfM	b4185	DUF1190 family protein	0	3	2	510	3620	3500	0	3	2	2	4	4243	2780	7527	0	7	0.03215401533320215	1.0
	22391	25207		+	ileS	b0026	isoleucyl-tRNA synthetase	35	44	45	55147	53001	63413	0	20	21	39	31	32163	47951	47182	0	15	0.032615916614706864	1.0
	2436649	2435636		-	usg	b2319	putative semialdehyde dehydrogenase	10	9	16	16758	10956	23003	0	16	9	7	5	13592	9097	7606	0	9	0.03264307827202893	1.0
	990622	993234		+	pepN	b0932	aminopeptidase N	37	55	46	58271	66414	64544	0	24	40	25	34	59375	31064	52686	0	18	0.032675761229047674	1.0
	2555728	2555228		-	eutK	b2438	putative ethanol utilization carboxysome structural protein	15	18	12	23152	22172	18041	1	42	5	13	10	7462	16144	15291	0	25	0.0327790160911408	1.0
	800575	799622		-	ybhD	b0768	putative DNA-binding transcriptional regulator	82	96	106	126483	115237	148014	3	136	69	78	73	102168	96575	111837	3	108	0.03287557004065518	1.0
	930962	929196		-	cydD	b0887	fused glutathione, cysteine exporter subunits of ABC superfamily: membrane component/ATP-binding component	69	73	82	106713	87437	115374	1	58	90	96	79	132872	118252	120010	2	70	0.03325274614017587	1.0
	580445	580251		-	ylcI	b4589	DUF3950 family protein, DLP12 prophage	28	22	26	43952	27065	37478	4	185	18	18	14	27399	23006	22278	3	124	0.03326960633546402	1.0
	2185917	2186741		+	rcnA	b2106	membrane protein conferring nickel and cobalt resistance	15	16	14	24182	19239	20477	0	25	19	30	19	29311	36773	29160	1	38	0.03338653503795016	1.0
	3727748	3727407		-	yiaB	b3563	YiaAB family inner membrane protein	3	11	5	4637	13502	7736	0	25	8	13	10	12132	16299	15840	1	43	0.03342981757414508	1.0
	2958884	2955996		-	ptrA	b2821	protease III	39	50	50	60901	60357	71150	0	22	41	40	23	60732	49678	35092	0	16	0.03349682626130329	1.0
3056849			3056988	+	sibC	b4446	-	101	88	92	156480	106342	128965	24	932	54	110	64	79311	134771	97383	22	741	0.03355196486696674	1.0
	2849241	2847415		-	hycC	b2723	hydrogenase 3, membrane subunit	12	33	16	19951	40649	23548	0	15	14	14	10	21473	17198	15614	0	9	0.033633466187404315	1.0
	189874	190599		+	rpsB	b0169	30S ribosomal subunit protein S2	26	33	40	40586	39873	56576	1	62	43	57	32	63994	70873	49441	2	84	0.03408675955216415	1.0
	1134729	1135511		+	flgG	b1078	flagellar component of cell-distal portion of basal-body rod	3	5	4	4620	6540	6390	0	7	8	8	6	11919	10102	9595	0	13	0.03413005399534073	1.0
	1115490	1114264		-	mdtG	b1053	putative drug efflux system protein	25	42	49	38579	51177	68697	1	43	23	39	19	35237	48333	29867	0	30	0.03458385710687597	1.0
1649382			1649434	+	dicF	b1574	-	0	0	0	0	0	379	0	2	0	0	0	452	0	462	0	5	0.034799374371842814	1.0
209056			208663	-	-	predicted RNA	antisense: accA	6728	6862	6335	10362147	8220266	8841251	625	23201	5878	6422	4758	8633598	7860672	7222435	583	20064	0.035195185496979184	1.0
	1610680	1609229		-	uxaB	b1521	altronate oxidoreductase, NAD-dependent	15	12	8	23325	14638	12253	0	11	17	16	21	25529	19625	31882	0	17	0.0352697977371806	1.0
	2806010	2807074		+	proW	b2678	glycine betaine transporter subunit	43	55	46	67503	66993	65287	1	62	33	44	30	49299	55040	46170	1	47	0.035292029366933576	1.0
	1819447	1818605		-	chbR	b1735	repressor of chb operon for N,N'-diacetylchitobiose utilization	1	0	0	2318	0	0	0	0	0	0	0	981	0	0	0	0	0.035394405430061844	1.0
	256527	257771		+	frsA	b0239	fermentation-respiration switch protein; PTS Enzyme IIA(Glc)-binding protein; pNP-butyrate esterase activity	25	22	21	39833	26350	30649	0	25	28	45	27	41197	55960	41739	1	37	0.0358766618255278	1.0
	3725887	3726882		+	wecH	b3561	O-acetyltransferase for enterobacterial common antigen (ECA)	11	27	21	17632	32734	30633	0	27	26	33	25	39045	40502	38468	1	39	0.03598313630629567	1.0
	335925	336788		+	yahE	b0319	DUF2877 family protein	0	3	3	1375	4763	4293	0	4	2	8	3	3449	10222	5573	0	7	0.03631017999475322	1.0
	1130863	1130204		-	flgA	b1072	assembly protein for flagellar basal-body periplasmic P ring	21	42	33	32825	50381	46536	1	65	18	23	22	26724	28921	33784	1	45	0.03637865307706858	1.0
	1417763	1417488		-	racC	b1351	Rac prophage; uncharacterized protein	6	16	7	10702	19919	10882	1	50	4	5	7	6130	6812	11601	0	29	0.03639039712330688	1.0
	1979021	1978518	1978508	-	insB1	b1893	IS1 transposase B	1418	1866	1547	2184357	2236062	2159070	118	4351	1607	1745	1402	2360476	2135946	2128986	127	4381	0.036470835589638505	1.0
494399			494007	-	-	predicted RNA	antisense: ybaB dnaX	6977	7279	6769	10745916	8719586	9446866	661	24522	6464	6764	5230	9493698	8279469	7938930	633	21808	0.03656674714413331	1.0
480186			480370	+	-	predicted RNA	antisense: tomB hha	1970	2356	1998	3035205	2822961	2788291	423	15579	2206	2592	1824	3240514	3172769	2769513	482	16545	0.03676727782744032	1.0
	4016431	4017192		+	udp	b3831	uridine phosphorylase	40	55	45	63125	66455	63215	2	84	57	75	62	83802	92741	94897	3	118	0.036849248490918037	1.0
2750197			2750643	+	-	predicted RNA	antisense: grpE	6804	6146	6312	10479788	7361957	8809165	533	19873	5378	5841	5169	7898685	7149423	7846048	494	17072	0.03697323265730183	1.0
	4123339	4122380		-	ftsN	b3933	essential cell division protein	68	88	72	105571	105430	100759	2	108	52	67	51	77817	82518	78340	2	82	0.03729685445659546	1.0
1390598	1390598	1389870	1389860	-	mpaA	b1326	murein peptide amidase A	331	396	346	511221	474588	483453	18	671	400	414	310	588550	507775	471667	20	716	0.03734166495745913	1.0
	1734101	1733754		-	grxD	b1654	glutaredoxin-4	29	27	18	44826	33013	26009	2	99	37	39	28	55575	47916	42725	4	140	0.03742751483627704	1.0
	2662131	2661643		-	iscR	b2531	isc operon transcriptional repressor; suf operon transcriptional activator; oxidative stress- and iron starvation-inducible; autorepressor	27	20	15	42602	24921	22004	1	61	11	15	14	17580	19257	22034	1	40	0.037681789354393085	1.0
	585633	584680		-	ompT	b0565	DLP12 prophage; outer membrane protease VII (outer membrane protein 3b)	51	72	68	78889	86817	95954	2	91	50	48	38	73813	59610	59159	1	67	0.038502497739109534	1.0
	1013259	1014899		+	pqiB	b0951	paraquat-inducible, SoxRS-regulated MCE domain protein	13	18	13	21405	21614	19139	0	12	18	29	19	26707	35748	29658	0	18	0.038608174749497126	1.0
2111988			2112535	+	-	predicted RNA	antisense: rfbB	7673	7985	7655	11818385	9564978	10682842	526	19504	7165	6972	6681	10523292	8533569	10141111	512	17760	0.03930093278088779	1.0
	1369689	1370003		+	pspE	b1308	thiosulfate:cyanide sulfurtransferase (rhodanese)	7	0	3	11394	796	4863	0	18	2	3	0	3919	4541	558	0	9	0.03947834666429217	1.0
	1637782	1637609		-	gnsB	b1550	Qin prophage; multicopy suppressor of secG(Cs) and fabA6(Ts)	0	0	0	0	755	1023	0	3	1	0	0	2100	622	1448	0	7	0.0395086630165937	1.0
	2375962	2375000		-	menC	b2261	O-succinylbenzoyl-CoA synthase	3	6	0	5641	8071	718	0	4	5	10	3	8580	12911	5006	0	9	0.03987759176577846	1.0
	649571	648039		-	citF	b0615	citrate lyase, citrate-ACP transferase (alpha) subunit	20	26	29	32246	32217	40558	0	22	15	18	16	23471	22433	25087	0	15	0.039903400873819855	1.0
456800			456644	-	-	predicted RNA	antisense: clpP	1855	2254	1950	2858279	2700551	2721600	477	17580	1902	2217	1701	2793254	2714283	2583243	500	17177	0.04011741382479263	1.0
	3486120	3486752		+	crp	b3357	cAMP-activated global transcription factor, mediator of catabolite repression	52	52	24	80515	62773	34654	2	93	26	43	28	39617	52960	42803	2	71	0.04016010039922671	1.0
	1191986	1190616		-	purB	b1131	adenylosuccinate lyase	29	33	27	45085	40281	38857	0	30	46	40	32	67938	49642	49136	1	40	0.040829855517853335	1.0
4606286			4606200	-	leuP	b4369	Leu tRNA	2	1	2	3382	1544	3814	0	33	1	1	0	1690	1655	785	0	15	0.0410527034595785	1.0
	3204694	3205311		+	plsY	b3059	putative glycerol-3-phosphate acyltransferase	47	35	49	73412	42915	68945	2	99	29	37	34	43843	46147	52058	2	76	0.04130735228716753	1.0
	562336	563319		+	sfmH	b0533	FimA homolog, function unknown	5	6	5	8876	7785	8281	0	8	3	4	2	5259	5475	3166	0	4	0.04161520281839507	1.0
	2185796	2185524		-	rcnR	b2105	transcriptional repressor of rcnA	2	5	5	4066	7057	8174	0	23	9	6	6	14617	8298	10607	1	40	0.04176643723101618	1.0
	4285213	4284899		-	yjcH	b4068	DUF485 family inner membrane protein	2	5	3	3356	6519	5400	0	16	2	9	8	3142	12026	12552	0	29	0.04178342866705796	1.0
	568315	568647		+	emrE	b0543	DLP12 prophage; multidrug resistance protein	0	2	1	847	3532	1593	0	5	0	1	0	0	2037	662	0	2	0.0418732200791539	1.0
	2370018	2370908		+	arnD	b2256	undecaprenyl phosphate-alpha-L-ara4FN deformylase	12	24	14	19103	29569	19866	0	25	13	10	7	20056	12981	10650	0	16	0.04210994764760511	1.0
	2880387	2879788		-	casE	b2756	CRISPR RNA precursor cleavage enzyme; CRISP RNA (crRNA) containing Cascade antiviral complex protein	3	3	1	6134	3804	2452	0	6	4	3	7	6386	4732	11435	0	12	0.042198036224951586	1.0
	3768177	3768638		+	yibG	b3596	TPR-like repeat protein	2	0	0	3149	884	1089	0	3	0	0	0	0	700	1500	0	1	0.04240634588521955	1.0
	767978	770611		+	mngB	b0732	alpha-mannosidase	39	42	34	60832	50435	48683	0	20	21	34	29	31130	41683	44129	0	14	0.042439389611798134	1.0
	3898022	3898609		+	cbrC	b3717	UPF0167 family protein	35	25	27	54101	29991	38048	1	69	30	49	37	45397	61082	57493	2	92	0.04252655672347436	1.0
1118476	1118476	1117901	1116788	-	yceI	b1056	secreted protein	371	371	363	572019	444793	507703	23	882	308	275	281	453688	336837	427015	20	704	0.0425487152321616	1.0
2086638			2087225	+	-	predicted RNA	antisense: yoeI plaP	9821	8679	8826	15125566	10395569	12316191	575	21449	7625	7835	7387	11198352	9590024	11211959	524	18140	0.04255317619357518	1.0
	2654933	2654157		-	sseB	b2522	rhodanase-like enzyme, sulfur transfer from thiosulfate	19	11	17	29892	13815	24126	0	29	21	29	20	31745	35564	31350	1	42	0.042565174455949366	1.0
	2013229	2014887		+	fliF	b1938	flagellar basal-body MS-ring and collar protein	6	9	3	9508	11603	4681	0	5	9	8	12	14429	10307	18510	0	8	0.04278562392865462	1.0
	2124520	2123084		-	cpsB	b2049	mannose-1-phosphate guanyltransferase	10	14	12	15478	17006	17653	0	11	1	15	5	2800	19179	8696	0	7	0.042978419808238806	1.0
1914811			1915564	+	-	predicted RNA	antisense: prc proQ	19308	20329	18893	29736165	24349618	26363966	960	35565	17134	19477	14409	25163456	23838486	21870027	912	31331	0.04308128230691211	1.0
	3153563	3154222		+	yghB	b3009	general envelope maintenance protein; DedA family inner membrane protein	75	113	101	116378	135960	142283	5	199	61	74	88	89643	90696	134246	4	158	0.04349606333349645	1.0
	191855	192580		+	pyrH	b0171	uridylate kinase	6	4	8	9404	5002	11956	0	12	11	8	10	17597	10887	15404	0	20	0.043855789846506815	1.0
939841			939404	-	-	predicted RNA	antisense: serS	6150	6848	5743	9472702	8202586	8013970	529	19550	5216	6251	4852	7661168	7651085	7364881	502	17258	0.04422905505824387	1.0
988510			989020	+	-	predicted RNA	antisense: asnS	7609	8788	8397	11719683	10527113	11718735	599	22156	6752	8262	6982	9917247	10112889	10597513	580	19978	0.04437077611504597	1.0
	2192796	2192515		-	yehE	b2112	DUF2574 family protein	6	8	5	10685	9691	7480	0	32	4	2	3	6915	3197	5748	0	18	0.04469706443822481	1.0
665080			665247	+	-	predicted RNA	antisense: mrdB rlpA	1935	2276	2088	2981415	2726793	2914565	463	17108	2035	2453	1802	2988755	3002596	2735755	505	17315	0.045153309924236606	1.0
2441326			2441610	+	-	predicted RNA	antisense: fabB	7336	5144	5428	11298831	6161555	7575105	778	29281	5585	5790	4310	8202015	7086459	6542227	742	25532	0.0451672730990917	1.0
	1266094	1266927		+	prmC	b1212	N5-glutamine methyltransferase, modifies release factors RF-1 and RF-2	27	39	27	42256	47692	37833	1	51	17	21	24	26195	26395	36714	1	35	0.04541557245067894	1.0
	690881	689343		-	lnt	b0657	apolipoprotein N-acyltransferase	36	47	38	56445	56635	53381	0	36	30	29	28	44868	36519	43597	0	27	0.045554557353187676	1.0
	2667846	2666707		-	hcaT	b2536	putative 3-phenylpropionic transporter	28	69	48	43130	82890	67351	1	56	60	80	53	89463	98967	80469	2	78	0.046028620892639135	1.0
	2302753	2300267		-	napA	b2206	nitrate reductase, periplasmic, large subunit	49	57	48	76111	68449	67351	0	28	33	48	34	48463	58761	52590	0	21	0.04655290468720304	1.0
	1689852	1691360		+	ydgA	b1614	DUF945 family protein	22	20	19	35092	24213	27173	0	19	10	19	11	16137	23813	17646	0	12	0.04657580069378107	1.0
	2976599	2977630		+	galR	b2837	galactose-inducible d-galactose regulon transcriptional repressor; autorepressor	61	79	63	94151	95120	88869	2	89	40	62	48	60109	75889	73900	1	67	0.046840759580937426	1.0
	1523065	1520963		-	yncD	b1451	putative iron outer membrane transporter	22	23	22	34400	27827	31665	0	14	36	37	22	52937	45440	34630	0	21	0.04686545693663272	1.0
1798759			1799113	+	-	predicted RNA	antisense: pheS	6578	6748	6564	10131683	8083040	9160251	692	25704	6073	6759	5380	8919228	8273109	8166547	691	23811	0.04690546735224999	1.0
	3342836	3343411		+	lptC	b3199	lipopolysaccharide export, IM-tethered periplasmic protein of the LptBFGC export complex	25	22	28	39712	26902	39253	1	61	33	43	29	48480	53328	44722	2	84	0.046908642189797595	1.0
	998490	999191		+	elfD	b0939	putative periplasmic pilin chaperone	8	16	6	13021	19191	9379	0	19	20	16	8	29516	20332	13555	0	30	0.04712685224458594	1.0
	1688576	1689751		+	manA	b1613	mannose-6-phosphate isomerase	15	32	28	23498	39492	39526	0	29	28	42	32	41956	52125	48892	1	40	0.04740314570256959	1.0
3836222			3836316	+	selC	b3658	Sec tRNA	1	2	0	1825	3436	1073	0	22	0	1	0	572	1464	976	0	10	0.04754178576301523	1.0
691650			691823	+	-	predicted RNA	antisense: ybeX	1948	2282	2012	3001444	2733564	2808463	443	16366	2012	2251	1774	2955635	2756059	2693073	468	16101	0.04780083788404461	1.0
	3353025	3350689		-	arcB	b3210	aerobic respiration control sensor histidine protein kinase, cognate to two-component response regulators ArcA and RssB	76	80	58	117477	96256	81124	1	42	72	97	80	106292	119214	122679	1	49	0.047954923439397106	1.0
2440361			2440977	+	-	predicted RNA	antisense: fabB	10928	7915	8543	16830593	9480937	11921402	549	20655	8722	8518	6059	12810066	10425397	9196379	509	17521	0.048028639856732794	1.0
	260388	261491		+	proB	b0242	gamma-glutamate kinase	8	14	6	13765	16979	8702	0	11	15	12	15	22378	15118	23072	0	18	0.04843023996795106	1.0
	1364232	1365512		+	puuB	b1301	gamma-glutamylputrescine oxidoreductase	9	7	8	14474	9548	12393	0	9	21	12	6	31326	15606	9813	0	14	0.04849198616791446	1.0
	1757421	1757657		+	lpp	b1677	murein lipoprotein	33	25	18	51168	30413	25712	4	150	18	26	9	27365	32012	14593	3	104	0.048672358488218936	1.0
	2009479	2009712		+	yedF	b1930	putative TusA family sulfurtransferase	2	6	7	4490	8241	10048	0	32	2	4	2	3816	5348	3628	0	18	0.049053008580787136	1.0
	57109	54755		-	lptD	b0054	LPS assembly OM complex LptDE, beta-barrel component	69	80	88	107259	96767	123920	1	46	55	79	56	81839	97198	85990	1	37	0.04913535260464642	1.0
	711898	711605		-	ybfE	b0685	LexA-regulated protein, CopB family	5	14	11	8375	17272	16134	1	47	15	17	12	23454	21457	18501	2	71	0.04935537008608045	1.0
3941793			3941531	-	-	predicted RNA	-	24534	15378	14126	37784054	18420219	19712814	2551	96219	16042	18880	13334	23560399	23108270	20239270	2474	84800	0.04936934064960046	1.0
	3169828	3170487		+	qseB	b3025	quorum sensing DNA-binding response regulator in two-component regulatory system with QseC	24	48	24	37558	57499	33597	1	64	36	51	35	53551	63070	53454	2	85	0.04939256667769398	1.0
	4085822	4082772		-	fdoG	b3894	formate dehydrogenase-O, large subunit	76	86	64	118177	103089	89736	0	33	87	93	80	128509	114432	122348	1	39	0.049535948520046114	1.0
	3581138	3581626		+	yhhY	b3441	putative acetyltransferase	22	27	20	33950	33142	29023	1	65	14	16	16	20833	19943	24520	1	44	0.04962328499086959	1.0
	2709404	2708754		-	rseA	b2572	anti-sigma factor	8	12	9	13462	14373	13805	0	21	12	16	16	17870	20679	24668	0	32	0.049665576239067304	1.0
	1087846	1086521		-	pgaC	b1022	biofilm PGA synthase PgaCD, catalytic subunit; poly-beta-1,6-N-acetyl-D-glucosamine synthase; c-di-GMP-stimulated activity and dimerization	15	26	16	24493	31210	23160	0	19	25	35	20	37969	43685	30626	0	28	0.04970029247640773	1.0
	4097448	4095979		-	rhaB	b3904	rhamnulokinase	22	35	18	33881	42677	26455	0	23	17	45	40	26340	55988	60746	0	32	0.049843384758321306	1.0
	4351662	4350031		-	dcuS	b4125	sensory histidine kinase in two-component regulatory system with DcuR, regulator of anaerobic fumarate respiration	62	85	61	97015	101959	86334	1	58	80	97	67	118066	119412	101849	2	69	0.04991950908214107	1.0
989607			990228	+	-	predicted RNA	antisense: pncB	8629	8189	7919	13289444	9808813	11051713	492	18301	7407	8199	6655	10877954	10034863	10101910	482	16620	0.050016765969115105	1.0
	2890099	2888387		-	cysI	b2763	sulfite reductase, beta subunit, NAD(P)-binding, heme-binding	9	6	3	14656	7860	4623	0	5	10	9	11	15949	11404	17027	0	8	0.05011079751917562	1.0
3422436	3422436	3423194	3423196	+	yhdZ	b3271	putative amino-acid transporter subunit	197	425	298	304646	510146	416968	15	540	342	436	302	503287	534057	459455	19	657	0.050185865588327695	1.0
1332563			1332099	-	-	predicted RNA	antisense: topA	6982	7992	7080	10753132	9572948	9880290	586	21653	7361	7498	5772	10810869	9177431	8761243	598	20608	0.05029255949931703	1.0
	1155124	1155765		+	tmk	b1098	thymidylate kinase	1	4	4	2586	5423	6399	0	7	1	2	1	2501	3268	1875	0	3	0.050499927211006816	1.0
668599			668996	+	-	predicted RNA	antisense: rsfS rlmH	5777	5674	5276	8897395	6797005	7363529	520	19311	4838	5340	4110	7105806	6536031	6238668	484	16650	0.050804013643096696	1.0
	1381947	1382852		+	ompG	b1319	outer membrane porin G	15	18	16	24104	21995	22863	0	25	10	10	11	14848	13144	16756	0	16	0.05104973279950809	1.0
	2309341	2308691		-	alkB	b2212	oxidative demethylase of N1-methyladenine or N3-methylcytosine DNA lesions	0	6	4	994	7322	6828	0	7	7	9	3	10433	11496	5068	0	13	0.05115727873531067	1.0
3599950			3600985	+	-	predicted RNA	antisense: rpoH	19465	24117	18309	29978482	28887477	25549731	739	27160	17102	23028	15173	25116897	28185206	23030591	720	24560	0.05164582655777197	1.0
	818570	819055		+	moaC	b0783	molybdopterin biosynthesis, protein C	1	1	1	2387	1830	2188	0	4	4	3	0	6514	4258	959	0	8	0.051702890327650075	1.0
4481948			4483395	+	-	predicted RNA	antisense: valS	21308	23476	22078	32816360	28118871	30808438	570	21119	19578	20784	18147	28753227	25438436	27543545	545	18815	0.05178656473860889	1.0
	3452926	3452297		-	rplC	b3320	50S ribosomal subunit protein L3	51	73	104	78620	88029	145908	4	165	91	101	70	135015	124478	107397	5	194	0.05180143293287975	1.0
	1036354	1036752		+	hyaE	b0976	putative HyaA chaperone	0	2	4	1358	3586	6101	0	9	1	2	0	2629	2822	0	0	4	0.05200714685458792	1.0
160186			160636	+	-	predicted RNA	antisense: dksA	9561	8288	8794	14724684	9927882	12272033	730	27290	7205	9226	6780	10581898	11292479	10291355	694	23773	0.05204910959634771	1.0
2695296			2695569	+	-	predicted RNA	antisense: purL	6925	7767	7644	10665071	9303994	10667682	1007	37270	6918	7541	6552	10159904	9229918	9945629	1034	35687	0.052430207090861124	1.0
	4213234	4213617		+	yjaA	b4011	stress-induced protein	28	31	26	43986	37831	36363	2	102	41	37	33	61039	45327	51456	3	136	0.05277151031364035	1.0
	3284685	3285488		+	agaC	b3139	N-acetylgalactosamine-specific enzyme IIC component of PTS	3	5	1	5822	6213	2336	0	5	7	4	5	11458	5192	9019	0	10	0.05291132380133129	1.0
	1705767	1706348		+	rsxA	b1627	SoxR iron-sulfur cluster reduction factor component; inner membrane protein of electron transport complex	1	0	1	2759	1184	2733	0	3	3	3	1	5601	4400	2137	0	6	0.053254386003931155	1.0
697047			696963	-	leuW	b0672	Leu tRNA	4	1	4	6238	1796	6101	1	55	2	1	1	3731	1987	1805	0	29	0.05350882617318363	1.0
	1876909	1877256		+	yeaO	b1792	DUF488 family protein	99	111	97	152664	133278	136272	10	404	76	90	67	111825	110972	102939	9	312	0.05366218138637858	1.0
	2933688	2933041		-	fucA	b2800	L-fuculose-1-phosphate aldolase	4	5	7	6160	6022	10123	0	11	9	9	7	14327	11680	11383	0	19	0.05372968834976748	1.0
3332430			3332784	+	-	predicted RNA	antisense: yhbE	6761	6997	5855	10413670	8380849	8170464	684	25319	6684	6874	4918	9816444	8413738	7464584	701	24126	0.05381398570102222	1.0
	1322946	1321384		-	trpE	b1264	component I of anthranilate synthase	25	25	23	39920	30767	32953	0	22	19	20	12	28500	24817	18405	0	15	0.054236120034622	1.0
	4002799	4002419		-	yigF	b3817	putative inner membrane protein	58	67	66	90102	80767	93055	6	230	47	45	48	69612	55542	73961	5	174	0.05425355160332018	1.0
1331992			1331581	-	-	predicted RNA	antisense: topA	6547	7361	6404	10082912	8816809	8937635	610	22522	6685	7124	5387	9818306	8719660	8177634	628	21614	0.05435258790211329	1.0
1333165			1333047	-	-	predicted RNA	antisense: topA	1535	1723	1494	2364388	2064740	2085467	494	18248	1609	1680	1317	2364105	2056476	2000130	522	17985	0.054658282539179204	1.0
2620730			2620855	+	-	predicted RNA	antisense: upp	1624	1818	1663	2501418	2177882	2321195	501	18519	1538	1898	1379	2259921	2323792	2093571	515	17664	0.055125466494271524	1.0
3477910			3478506	+	-	predicted RNA	antisense: slyD	20423	19716	18112	31453374	23616319	25274733	1207	44860	18147	21122	14077	26651050	25852536	21366608	1204	41245	0.055146391267126824	1.0
	3504052	3504783		+	frlR	b3375	putative DNA-binding transcriptional regulator	18	23	15	29217	28419	21624	0	36	27	31	21	40915	38726	32336	1	50	0.055156771969279025	1.0
	4556320	4555490		-	yjiC	b4325	uncharacterized protein	36	33	35	55450	40077	48881	1	57	20	26	27	30362	32196	41381	1	41	0.055306168634618895	1.0
	1553838	1552828		-	adhP	b1478	ethanol-active dehydrogenase/acetaldehyde-active reductase	4	13	15	6817	16305	21319	0	14	5	9	5	7744	12019	7711	0	9	0.055554278900387936	1.0
3708692			3708616	-	proK	b3545	Pro tRNA	0	2	2	622	3300	2799	0	29	0	1	0	554	2009	741	0	14	0.05562177433062579	1.0
	1718395	1718066		-	mliC	b1639	inhibitor of c-type lysozyme, membrane-bound; putative lipoprotein	17	20	9	26561	24547	13508	1	65	7	12	10	11108	14977	15823	1	42	0.05582140082138684	1.0
	3656740	3656408		-	hdeA	b3510	stress response protein acid-resistance protein	0	0	1	1090	973	1882	0	3	0	1	0	0	1492	209	0	1	0.05588969254529026	1.0
3150944			3151064	+	-	predicted RNA	antisense: exbD	1797	1853	1683	2767814	2219647	2348534	545	20209	1698	1875	1356	2494168	2295359	2058173	549	18864	0.05593715468436679	1.0
	835248	836210		+	ybiB	b0800	putative family 3 glycosyltransferase	15	19	18	24614	23676	25910	0	25	21	35	20	30959	43310	30643	1	36	0.05615829365849001	1.0
	1726023	1726622		+	nemR	b1649	transcriptional repressor for the nemRA-gloA operon, quinone-, glyoxal-, and HOCl-activated	9	9	4	15288	11610	6357	0	18	2	7	5	3099	8956	7920	0	11	0.056442509733650614	1.0
	1287176	1287087		-	tpr	b1229	protamine-like protein	1	2	5	2318	3259	7034	1	46	1	2	0	2663	2935	994	0	24	0.056723622432103424	1.0
	1373222	1374103		+	ycjO	b1311	inner membrane putative ABC superfamily sugar transporter permease	2	2	10	4421	2885	14928	0	8	2	2	3	4217	3006	5451	0	4	0.05674357684997486	1.0
	412481	411297		-	araJ	b0396	arabinose-inducible putative transporter, MFS family	40	39	42	62034	47100	58979	1	47	30	34	27	45030	42603	41233	1	36	0.05700915430719308	1.0
3087809			3087518	-	-	predicted RNA	antisense: metK	4584	4579	4598	7060823	5485490	6417083	582	21647	3106	3791	3707	4561765	4640162	5627747	490	16928	0.057458996931146464	1.0
3948370	3947967	3947128	3946837	-	hdfR	b4480	flhDC operon transcriptional repressor	1063	1320	1187	1638345	1581972	1656931	52	1935	1202	1724	1095	1766256	2110314	1663276	64	2198	0.0575323908545363	1.0
	2881048	2880374		-	casD	b2757	CRISP RNA (crRNA) containing Cascade antiviral complex protein	20	33	9	32003	39730	13797	1	42	23	41	22	34801	50647	34883	1	59	0.0576719870011482	1.0
458687			458553	-	-	predicted RNA	antisense: clpX	1833	1860	1659	2824251	2228657	2315663	490	18194	1606	1930	1400	2358563	2362723	2125252	493	16905	0.05774022257557798	1.0
	2989899	2989819		-	yqeL	b4683	uncharacterized protein	2	1	1	3919	1442	1535	0	28	2	2	3	3893	2525	5949	1	50	0.058059960540085345	1.0
144455	142670	142008	141375	-	can	b0126	carbonic anhydrase	2110	2011	1988	3250328	2409745	2774411	114	4240	1933	2019	1677	2839822	2472133	2545629	114	3950	0.058757742245307394	1.0
	755907	757673		+	sdhA	b0723	succinate dehydrogenase, flavoprotein subunit	6	19	14	10174	23274	19701	0	10	24	11	18	35408	14609	27965	0	14	0.05894365914846863	1.0
1287080			1287648	+	-	predicted RNA	antisense: rttR tyrT tyrV tpr	20224	17753	17175	31146565	21264597	23967723	1200	44744	16091	17859	16827	23631651	21858570	25540457	1203	41611	0.05911958440892604	1.0
4400657			4399821	-	-	predicted RNA	antisense: miaA hfq	17452	15275	14355	26877816	18296638	20032590	696	25968	13820	16500	10902	20296217	20195090	16547766	664	22715	0.05921305233487937	1.0
2731172			2731433	+	-	predicted RNA	-	14813	7171	7877	22813531	8589328	10992288	1415	53937	8797	8630	7318	12919885	10563211	11108443	1273	44009	0.059262741848536284	1.0
	4233233	4231884		-	lysC	b4024	lysine-sensitive aspartokinase 3	58	87	77	90655	104267	108777	2	74	47	67	56	69108	82313	85729	1	58	0.059311673409999245	1.0
	1749559	1748747		-	ydhT	b1669	FNR, Nar, NarP-regulated protein; putative subunit of YdhYVWXUT oxidoreductase complex	31	38	31	49117	45515	44612	1	57	43	59	28	64156	72741	43928	2	74	0.05947679457092729	1.0
2710420	2710420	2712042	2712782	+	nadB	b2574	quinolinate synthase, L-aspartate oxidase (B protein) subunit	369	425	391	569743	509650	546115	9	333	365	494	331	536962	605426	503271	9	337	0.059641119156867116	1.0
	612737	613939		+	fes	b0585	enterobactin/ferric enterobactin esterase	4	2	2	6826	2579	2823	0	3	5	6	3	7616	7937	5853	0	5	0.05986937957991849	1.0
	4277383	4277060		-	soxS	b4062	superoxide response regulon transcriptional activator; autoregulator	41	43	44	64621	52422	61596	4	183	33	31	34	49419	38945	51648	4	144	0.060851719491442684	1.0
	2849849	2849238		-	hycB	b2724	hydrogenase 3, Fe-S subunit	1	7	1	2898	9541	2584	0	8	2	2	1	3056	3459	1762	0	4	0.061010958827439316	1.0
2461868			2461410	-	-	predicted RNA	antisense: fadL	5513	5550	5597	8491001	6648434	7810965	448	16666	4872	5127	4928	7156224	6276031	7480181	438	15186	0.06109470752059206	1.0
	2507894	2506647		-	fryC	b2386	putative enzyme IIC component of PTS	4	13	8	7501	16496	11708	0	9	17	14	7	25589	17262	11819	0	14	0.06151422706148199	1.0
4402161			4401804	-	-	predicted RNA	antisense: hflX hflK	6100	6967	6390	9394436	8345236	8918000	672	24820	6505	6875	5412	9554106	8414531	8214401	707	24378	0.06179608103091717	1.0
	1555963	1555826		-	sra	b1480	stationary-phase-induced ribosome-associated protein	2	1	1	4576	1442	1577	0	18	0	2	5	1442	3417	8592	0	32	0.061874951650678675	1.0
	891184	891906		+	nfsA	b0851	nitroreductase A, NADPH-dependent, FMN-dependent	14	26	10	21621	31931	15044	0	31	25	30	15	36791	36929	23203	1	44	0.062013772924771615	1.0
	4602097	4601624		-	yjjB	b4363	DUF3815 family inner membrane protein	11	8	12	17883	9697	17628	0	31	3	9	7	4550	12147	11627	0	19	0.06201466407284281	1.0
	3405917	3407266		+	accC	b3256	acetyl-CoA carboxylase, biotin carboxylase subunit	25	25	30	39617	30937	43142	0	28	18	21	17	27211	26034	27250	0	19	0.06202749635417246	1.0
	1746700	1747005		+	ydhR	b1667	putative monooxygenase	0	2	4	1375	3395	5994	0	11	5	5	2	7718	6989	3977	0	20	0.06219947917546748	1.0
	724414	721730		-	kdpD	b0695	fused sensory histidine kinase in two-component regulatory system with KdpE: signal sensing protein	27	33	21	42230	39635	29923	0	13	29	46	32	43852	57198	49057	0	18	0.06220416298625142	1.0
	2508242	2507916		-	fryB	b2387	putative enzyme IIB component of PTS	0	0	1	458	381	2031	0	2	2	1	0	3090	1499	1133	0	5	0.06223165318291402	1.0
	3824515	3825204		+	trmH	b3651	tRNA mG18-2'-O-methyltransferase, SAM-dependent	10	9	8	16542	10813	11997	0	19	7	4	4	11483	6077	6934	0	11	0.06245291051581134	1.0
	2033484	2033119		-	yedR	b1963	inner membrane protein	0	3	0	0	4171	1139	0	4	1	5	0	2399	6218	1003	0	8	0.06259520423272925	1.0
2664216			2663433	-	-	predicted RNA	antisense: suhB	19411	22646	19649	29895552	27125534	27419180	973	35901	18259	20366	17690	26815394	24926968	26850497	968	33415	0.06284727295748657	1.0
3963503			3963623	+	-	predicted RNA	antisense: gpp	1313	1541	1436	2022486	1845760	2004582	438	16178	1549	1622	1160	2276203	1986253	1760685	482	16592	0.06313256286336762	1.0
	2852136	2853257		+	hypD	b2729	hydrogenase maturation protein	20	27	19	31986	33489	27371	0	27	26	47	20	39241	57927	31821	1	38	0.06318131261519876	1.0
459649			459492	-	-	predicted RNA	antisense: lon	2028	2031	1985	3124095	2433142	2770646	473	17569	1884	1770	1768	2767324	2166473	2683993	462	16071	0.06333450266338857	1.0
2270527			2270168	-	-	predicted RNA	antisense: mepS	6594	5397	4884	10156091	6465019	6816571	581	21701	5024	6839	4056	7379397	8371284	6156934	596	20284	0.06342635695174288	1.0
2428662			2428998	+	-	predicted RNA	antisense: purF	4741	5049	4989	7302015	6048598	6961910	542	20091	4246	4533	4151	6236782	5548086	6301273	517	17889	0.0635776138685804	1.0
122926			122053	-	-	predicted RNA	antisense: pdhR	23124	24526	21761	35613185	29376970	30366196	982	36367	21002	21658	19818	30844262	26508135	30080573	964	33345	0.06359759446759805	1.0
193430			192195	-	-	predicted RNA	antisense: pyrH frr	23926	22871	20984	36848304	27395052	29282825	678	25222	22109	22471	17109	32469245	27502617	25967951	672	23176	0.06381943388790857	1.0
	1657565	1657870		+	ynfD	b1586	DUF1161 family periplasmic protein	18	20	13	28586	25112	19230	2	79	9	18	8	13362	22603	12674	1	52	0.06385079991876241	1.0
4168475			4168250	-	-	predicted RNA	antisense: gltT	28896	17099	19188	44502344	20480978	26776195	3576	135338	19226	25413	16603	28236219	31103367	25201090	3654	124691	0.0640697113517542	1.0
	2941631	2941236		-	ygdD	b2807	UPF0382 family inner membrane protein	2	5	3	3953	7145	4640	0	13	2	3	0	2962	4343	1482	0	7	0.06429169420207137	1.0
	3114352	3113543		-	pppA	b2972	bifunctional prepilin leader peptidase/ methylase	22	29	21	35092	34878	30327	1	41	33	34	30	49188	42235	46292	1	56	0.06436275331291959	1.0
	4194204	4193569		-	thiE	b3993	thiamine phosphate synthase (thiamine phosphate pyrophosphorylase)	15	24	29	23516	29699	41780	1	49	16	23	8	23753	29267	12944	1	34	0.06474120795266085	1.0
3389520	3389520	3390449	3403404	+	aaeR	b3243	transcriptional regulator for aaeXAB operon	304	451	446	469683	540349	623573	15	585	408	404	370	600247	495168	561714	17	593	0.0648827455161336	1.0
	1710828	1711523		+	rsxE	b1632	SoxR iron-sulfur cluster reduction factor component; electron transport inner membrane NADH-quinone reductase	5	4	6	8695	5811	8612	0	11	1	3	4	2612	4145	6707	0	6	0.06494150158124497	1.0
4605378			4605660	+	-	predicted RNA	antisense: fhuF	4813	5988	5414	7413756	7173084	7555899	708	26080	4507	5393	4630	6619663	6601443	7028332	692	23850	0.06499242234450366	1.0
	3216779	3217402		+	yqjI	b3071	PadR family putative transcriptional regulator	42	45	31	65755	55056	44149	2	88	25	40	26	37346	49352	40099	1	67	0.06501980046277162	1.0
	652235	653893		+	citA	b0619	sensory histidine kinase in two-component regulatory system with CitB	8	19	13	13125	23458	19502	0	11	16	22	19	24940	26982	29239	0	16	0.06520888329268003	1.0
	4439262	4438708		-	ytfJ	b4216	putative transcriptional regulator	4	10	12	6843	12712	17108	0	22	12	18	10	18024	22136	15430	0	33	0.06523031534486048	1.0
	927432	926728		-	aat	b0885	leucyl/phenylalanyl-tRNA-protein transferase	8	3	2	13073	4450	4128	0	10	8	8	7	12892	10986	11706	0	16	0.06581922445192796	1.0
460793			460660	-	-	predicted RNA	antisense: lon	1383	1461	1515	2129901	1750687	2114623	402	14913	1553	1399	1370	2281207	1712776	2080198	435	15109	0.06629575967142042	1.0
3328154			3327822	-	-	predicted RNA	antisense: yhbY	5438	3974	3564	8375090	4760480	4973561	483	18127	3242	4478	2625	4762448	5481379	3985720	419	14243	0.06673335853251451	1.0
	2041375	2042025		+	zinT	b1973	zinc and cadmium binding protein, periplasmic	27	28	23	42490	34415	33440	1	56	29	48	30	43485	59059	45577	2	75	0.06688399019645498	1.0
2736632			2736176	-	-	predicted RNA	antisense: bamD	5251	6072	5274	8087601	7273989	7360275	449	16573	4821	6029	4522	7080097	7379617	6864131	453	15553	0.0675101636874872	1.0
	2403845	2402055		-	nuoC	b2286	NADH:ubiquinone oxidoreductase, fused CD subunit	30	45	28	46435	54797	40145	0	26	45	41	42	66956	50385	64602	0	33	0.0676464941505695	1.0
2110737			2111122	+	-	predicted RNA	antisense: rfbA rfbD	4823	4933	4431	7428897	5908792	6183758	454	16857	4194	4467	4005	6160314	5468065	6080251	442	15292	0.06766634335982546	1.0
	2109584	2108337		-	wzxB	b2037	putative polisoprenol-linked O-antigen transporter	34	47	50	53071	56955	69886	1	48	29	35	36	43818	42943	55321	1	37	0.06778268623773702	1.0
	2203972	2204289		+	yehK	b4541	uncharacterized protein	0	0	1	1046	0	1411	0	2	0	3	0	751	4322	0	0	5	0.06822959733658625	1.0
2929516			2928506	-	-	predicted RNA	antisense: sdaC	18288	17974	18390	28164907	21528685	25662538	668	24845	16634	18355	16556	24429516	22465886	25128707	687	23746	0.0683161388045356	1.0
494730			494608	-	-	predicted RNA	antisense: recR	1797	1780	1651	2768619	2132918	2304813	526	19529	1638	1789	1371	2406642	2189621	2080931	526	18095	0.06854499337699833	1.0
24082			23744	-	-	predicted RNA	antisense: ileS	5115	5506	5348	7877798	6595018	7463801	582	21569	5115	5255	4250	7512371	6432359	6451840	581	20055	0.06890837620248184	1.0
1989681	1989681	1990892	1995391	+	tyrP	b1907	tyrosine transporter	331	483	405	510953	579147	565634	12	455	384	431	404	564754	527569	613293	13	469	0.06904701014759423	1.0
	2822639	2822139		-	recX	b2698	regulatory protein for RecA	7	4	8	11645	5389	12236	0	19	11	11	9	17409	14043	14296	0	30	0.06917062262988105	1.0
4209880			4209738	-	-	predicted RNA	antisense: gltV	6486	2971	4287	9990309	3559541	5982330	1191	45529	4161	4216	4355	6111065	5160183	6611209	1201	41684	0.06925703397299351	1.0
	150953	149715		-	yadC	b0135	putative fimbrial-like adhesin protein	75	85	72	116283	102191	101511	2	86	80	102	86	118587	124839	131585	2	100	0.06946432976803787	1.0
926192			926502	+	-	predicted RNA	antisense: infA	16509	13484	11374	25425289	16151048	15872050	1649	61573	11684	14441	8926	17159315	17674524	13548011	1519	51856	0.06974504560505211	1.0
	605424	604771		-	nfsB	b0578	dihydropteridine reductase, NAD(P)H-dependent, oxygen-insensitive	9	8	13	13860	9867	19337	0	21	15	17	12	22848	21096	19242	0	32	0.06983541114327238	1.0
	2988502	2989311		+	yqeI	b2847	putative transcriptional regulator	6	15	6	10304	18633	9198	0	15	12	16	12	18673	19660	18702	0	23	0.06987879395097987	1.0
	2117127	2115907		-	wcaL	b2044	putative glycosyl transferase	8	18	13	12406	22199	19395	0	14	16	21	18	24957	25723	27329	0	21	0.06999909572521422	1.0
	4428717	4428079		-	ytfB	b4206	OapA family protein	31	29	21	49134	35095	30674	1	59	41	41	26	61338	50442	40317	2	79	0.07025003537015602	1.0
	1369393	1369614		+	pspD	b1307	peripheral inner membrane phage-shock protein	2	1	0	3729	1660	743	0	9	0	0	1	350	1167	1561	0	4	0.07048195493471428	1.0
	3176833	3176006		-	cpdA	b3032	3',5' cAMP phosphodiesterase	11	13	11	16992	16026	16720	0	20	19	19	12	28679	24365	19138	0	29	0.07086865842698921	1.0
3428777			3429033	+	-	predicted RNA	-	9637	6397	6896	14842342	7662596	9623581	1105	41671	7148	9011	6331	10498522	11029628	9610136	1180	40386	0.07105052884834677	1.0
	1258513	1257929		-	pth	b1204	peptidyl-tRNA hydrolase	3	5	5	6142	6553	7794	0	11	5	12	6	7607	15422	10484	0	19	0.07108194516602499	1.0
	229167	229970		+	dkgB	b0207	2,5-diketo-D-gluconate reductase B	36	32	47	55857	38662	66889	1	66	34	30	23	50247	37247	36243	1	51	0.07141929065566129	1.0
2111182			2111324	+	-	predicted RNA	antisense: rfbD	1782	1933	1910	2745077	2315958	2665931	486	18011	1621	1769	1581	2381369	2165136	2400226	469	16192	0.07142546209508523	1.0
	2861234	2860467		-	ygbI	b2735	DeoR family putative transcriptional regulator	17	18	26	26959	22383	36859	1	37	11	11	19	16709	14007	28907	0	25	0.07142766475033346	1.0
	4422846	4423700		+	ulaE	b4197	L-xylulose 5-phosphate 3-epimerase	0	3	5	1358	4491	7274	0	5	6	4	5	8973	5956	7772	0	8	0.0720922538047415	1.0
1181903			1182261	+	-	predicted RNA	antisense: potD	4427	4478	4310	6819112	5364577	6014573	455	16897	3777	3989	3412	5548104	4883162	5179405	420	14494	0.07259743056155311	1.0
3905597	3905597	3903720	3903720	-	bglF	b3722	fused beta-glucoside-specific PTS enzymes: IIA component/IIB component/IIC component	5360	8392	6540	8255840	10052674	9126744	133	4869	6202	8165	5917	9108965	9994396	8981315	145	4984	0.0726529626972247	1.0
	3907578	3906853		-	phoU	b3724	negative regulator of PhoR/PhoB two-component regulator	7	11	7	11922	13209	10907	0	16	13	17	8	19766	21804	12683	0	24	0.07271563786201526	1.0
	1050027	1050530	1051184	+	insB1	b0988	IS1 transposase B	6427	8885	7364	9898209	10642758	10276764	556	20382	7032	8289	6685	10327305	10145914	10147548	589	20251	0.0728803017456719	1.0
	545292	544057		-	allC	b0516	allantoate amidohydrolase	7	19	14	11161	23084	19948	0	14	16	26	14	24419	31892	21685	0	21	0.07295431146124386	1.0
1185299			1185618	+	-	predicted RNA	antisense: potA	4528	4724	4267	6973412	5659269	5955478	522	19362	4067	4467	3741	5973616	5467888	5679291	517	17834	0.07296196168706381	1.0
223645			223502	-	-	predicted RNA	-	7319	5192	4792	11271811	6219831	6687003	1490	55969	4837	7845	5001	7104448	9602186	7590971	1656	56244	0.07323623837395345	1.0
3087365			3086664	-	-	predicted RNA	antisense: metK	10650	10551	11293	16401972	12638056	15759879	572	21272	7793	9180	9116	11444646	11235946	13837657	501	17340	0.07330209926928238	1.0
4480975			4481300	+	-	predicted RNA	antisense: valS	4912	5525	5020	7565928	6618000	7006060	586	21666	4764	5185	4335	6996917	6347145	6580068	591	20372	0.07330333559066078	1.0
4401735			4401575	-	-	predicted RNA	antisense: hflX	2090	2267	2087	3218887	2715489	2912996	495	18317	2113	2171	1761	3103372	2657934	2674328	506	17465	0.07334802763995762	1.0
	2840990	2842414		+	ascB	b2716	cryptic 6-phospho-beta-glucosidase	24	29	25	37229	35592	35026	0	25	32	36	34	48446	44386	51936	0	33	0.07348438877032276	1.0
	53416	52427		-	pdxA	b0052	4-hydroxy-L-threonine phosphate dehydrogenase, NAD-dependent	13	11	5	20877	13679	7901	0	14	16	16	11	24854	19745	17472	0	20	0.07374236194681606	1.0
	4315538	4315104		-	phnO	b4093	aminoalkylphosphonate N-acetyltransferase	6	5	4	9569	6839	6886	0	17	13	7	5	19970	9508	8147	0	28	0.07375265452063844	1.0
	1335291	1335458		+	yciX	b4523	uncharacterized protein	4	3	1	6463	4001	1808	0	24	2	1	1	3099	1591	1910	0	13	0.07379207280303794	1.0
	3444539	3444105		-	rplO	b3301	50S ribosomal subunit protein L15	42	40	44	65539	48666	62067	3	135	53	66	50	78833	81825	76334	5	181	0.0739697969022703	1.0
	2569511	2568324		-	eutG	b2453	ethanol dehydrogenase involved in ethanolamine utilization; aldehyde reductase, converts acetaldehyde to ethanol	13	17	6	20245	21137	9115	0	14	12	28	12	17836	35380	19705	0	20	0.07411815061638183	1.0
60345			60486	+	-	predicted RNA	antisense: rapA rluA	1737	1942	1849	2675549	2326167	2580216	481	17797	1717	1739	1437	2522899	2129274	2181402	464	16041	0.07414282766259932	1.0
	2306754	2305108		-	mqo	b2210	malate dehydrogenase, FAD/NAD(P)-binding domain	14	43	30	22469	51803	42399	0	23	34	44	31	50230	54962	48150	0	31	0.07419183228162207	1.0
	4051347	4051856		+	yihI	b3866	activator of Der GTPase	8	12	20	12839	14625	28585	0	36	9	11	5	14643	13512	8356	0	23	0.07427077768200674	1.0
	3540407	3542728		+	feoB	b3409	fused ferrous iron transporter, protein B: GTP-binding protein/membrane protein	40	59	31	62467	71308	43927	0	25	37	36	27	55114	44570	41434	0	20	0.0743649532050788	1.0
4377722	4377722	4377189	4375670	-	blc	b4149	outer membrane lipoprotein (lipocalin), cell division and growth function	1348	1845	1447	2076838	2210072	2020171	107	3937	1479	1696	1285	2173224	2076087	1950811	112	3870	0.07478902555280484	1.0
	536586	537464		+	glxR	b0509	tartronate semialdehyde reductase, NADH-dependent	1	3	1	1920	3722	2179	0	2	0	2	0	0	3254	732	0	1	0.07488060287081898	1.0
	2545773	2546669		+	murQ	b2428	N-acetylmuramic acid 6-phosphate (MurNAc-6-P) etherase	36	46	48	56601	55328	68029	1	66	24	39	38	35425	48807	58775	1	53	0.07509916264789278	1.0
	2591607	2592734		+	dapE	b2472	N-succinyl-diaminopimelate deacylase	62	88	91	96928	105723	127380	2	97	86	100	98	127535	122801	148831	3	117	0.07513501819799946	1.0
	3805950	3805153		-	waaP	b3630	kinase that phosphorylates core heptose of lipopolysaccharide	2	5	4	3884	6206	6209	0	6	1	3	1	2689	4541	2119	0	3	0.07535186506715565	1.0
2724120	2724128	2724451	2725922	+	yfiM	b2586	putative lipoprotein	4914	5580	4546	7568316	6683714	6344059	574	21189	4814	5328	3917	7069919	6521867	5946292	585	20100	0.07611093773034013	1.0
	4058034	4056625		-	glnA	b3870	glutamine synthetase	30	61	45	47205	73404	63140	1	43	59	66	52	87491	81054	79248	1	58	0.07630342809254993	1.0
2521322			2520932	-	-	predicted RNA	antisense: valY valU lysV valX	18138	13726	11314	27935092	16440656	15788019	1370	51290	12340	18460	9976	18123505	22594446	15141957	1406	47621	0.07648773929250953	1.0
	4320663	4319599		-	phnI	b4099	ribophosphonate triphosphate synthase complex putative catalytic subunit	15	20	22	23446	25105	32045	0	25	9	15	14	14532	18457	22540	0	17	0.07661766919796165	1.0
	3386129	3385857		-	yhcO	b3239	putative barnase inhibitor	13	23	22	20539	28460	31508	2	98	30	29	20	44253	35748	30748	3	135	0.07742944519213643	1.0
2337598			2338559	+	-	predicted RNA	antisense: gyrA	13426	14769	14097	20677496	17690132	19671852	543	20110	13318	13292	10876	19559101	16269310	16508007	525	18134	0.07756239719102197	1.0
1641307			1641700	+	-	predicted RNA	antisense: cspB	20423	14412	8855	31452690	17263338	12357815	1380	51669	12323	22092	7947	18098505	27039441	12062037	1449	48392	0.0778498348857075	1.0
	1051847	1052077		+	ymcE	b0991	cold shock gene	5	2	3	8764	2456	5011	0	23	4	1	1	6096	1726	1526	0	13	0.07799535263537119	1.0
3111169	3111126	3110590	3110372	-	yghD	b2968	putative membrane-anchored secretion pathway M-type protein	1050	2037	1517	1617148	2440703	2117537	105	3833	1159	1683	1550	1702126	2059985	2353227	110	3795	0.07862178406234997	1.0
	1921780	1922016		+	yebV	b1836	uncharacterized protein	19	23	16	30308	28351	23672	3	115	24	34	23	36022	41754	35301	4	159	0.07878058992124905	1.0
	2255355	2256014		+	yeiL	b2163	putative transcriptional regulator	1	2	2	1739	3300	3756	0	4	0	0	1	1101	834	2564	0	2	0.07926797963579568	1.0
	3843789	3842455		-	yicO	b3664	putative adenine permease	16	20	17	25194	24295	24011	0	18	25	22	23	37628	27470	36139	0	25	0.07928902651692837	1.0
197918			197511	-	-	predicted RNA	antisense: rseP	5861	6339	5337	9027063	7593575	7448385	532	19664	6556	6315	4888	9628022	7729041	7419033	586	20241	0.07934639142995747	1.0
	401747	403162		+	phoA	b0383	bacterial alkaline phosphatase	60	77	59	93277	92799	83411	1	63	48	61	42	70636	74743	64436	1	49	0.07976307165461023	1.0
4403528			4402366	-	-	predicted RNA	antisense: hflC hflK	16329	17821	16707	25148373	21345630	23313764	540	20007	16884	17018	13836	24796243	20829126	21000348	553	19095	0.08028411026262999	1.0
	2610706	2611464		+	hyfI	b2489	hydrogenase 4, Fe-S subunit	12	27	16	19164	33204	22376	0	32	16	31	26	23872	37976	40910	1	45	0.0804686105166434	1.0
758402			758249	-	-	predicted RNA	antisense: sdhB	2083	2658	1858	3208349	3184007	2593146	530	19449	2191	2664	1422	3217742	3261450	2159464	549	18698	0.08058452280869052	1.0
	37824	36271		-	caiC	b0037	putative crotonobetaine/carnitine-CoA ligase	55	65	64	85161	78120	90083	1	54	76	91	57	112482	112253	87264	1	66	0.08063894518300063	1.0
	1194951	1194298		-	rluE	b1135	23S rRNA pseudouridine(2457) synthase	1	2	4	2214	3341	6101	0	5	5	6	2	8350	8022	3297	0	10	0.08080542092829322	1.0
2433018			2433947	+	-	predicted RNA	antisense: accD	14201	13819	12588	21870401	16553130	17566922	540	20068	11806	13154	10436	17339096	16100417	15840683	513	17663	0.080856815228475	1.0
2930214			2929856	-	-	predicted RNA	antisense: sdaB	4564	4482	4259	7028992	5369320	5943770	458	17030	3738	4502	3896	5490428	5511213	5914785	456	15706	0.08086073686323718	1.0
	771458	773026		+	cydA	b0733	cytochrome d terminal oxidase, subunit I	9	18	10	14223	22464	14036	0	10	17	21	14	25341	26062	21266	0	15	0.0809005700943402	1.0
3151532			3151652	+	-	predicted RNA	antisense: exbB	1618	1764	1552	2492888	2113148	2165997	504	18655	1553	1784	1274	2281301	2183756	1934813	514	17630	0.08124819772925954	1.0
	1163260	1164084		+	thiK	b1106	thiamine kinase	6	15	7	9672	18177	10890	0	15	5	6	5	8384	7675	8722	0	10	0.08130013869681288	1.0
	3725712	3725413		-	ysaB	b4553	uncharacterized protein	5	4	8	8790	5845	11312	0	28	9	12	7	13276	15663	11854	1	45	0.0813042581523681	1.0
987770			988443	+	-	predicted RNA	antisense: asnS	10413	9918	9623	16036797	11880257	13428519	549	20447	8259	9193	7911	12129619	11251920	12008286	507	17502	0.08178073309674581	1.0
1269409	1269275	1269168	1263604	-	ldrA	b4419	toxic polypeptide, small	400	385	368	616144	462202	514383	132	4915	313	381	292	461031	467230	444556	123	4237	0.08188604109271326	1.0
847234			847638	+	-	predicted RNA	antisense: glnH	4440	5294	4573	6839314	6341976	6382379	437	16101	4333	5201	4218	6364489	6366353	6403480	458	15748	0.08239119259393236	1.0
	2712896	2714230		+	srmB	b2576	ATP-dependent RNA helicase	66	85	67	102673	102484	94426	2	74	64	91	90	94006	111559	137657	2	85	0.08268981128023324	1.0
	633586	634746		+	ybdL	b0600	methionine aminotransferase, PLP-dependent	34	53	41	53028	64291	57823	1	50	39	29	30	57385	35967	46449	1	40	0.08273919142922208	1.0
1398767			1399519	+	-	predicted RNA	antisense: fnr	13144	15752	12668	20243796	18867599	17678375	683	25139	12086	14583	10594	17749410	17849197	16080198	667	22876	0.0830043173458081	1.0
	628551	629297		+	entA	b0596	2,3-dihydro-2,3-dihydroxybenzoate dehydrogenase	20	30	25	31026	36736	35414	1	46	35	46	19	51673	57155	29649	1	61	0.083905274319957	1.0
461748			461367	-	-	predicted RNA	antisense: hupB	10992	9391	8395	16928698	11248373	11714870	933	34809	8205	10627	6448	12050913	13007456	9787299	892	30406	0.08396599940332468	1.0
	897084	897929		+	potI	b0857	putrescine transporter subunit: membrane component of ABC superfamily	2	4	3	3305	4804	4186	0	4	2	2	9	3235	3282	14174	0	8	0.08436140250061129	1.0
	348443	346857		-	prpR	b0330	propionate catabolism operon regulatory protein	24	39	45	37125	47903	63842	0	31	39	53	43	57590	64973	66198	1	39	0.08441936065409746	1.0
	4264314	4265729		+	dnaB	b4052	replicative DNA helicase	82	84	85	127150	100877	119354	2	81	60	84	69	89088	103629	105033	2	70	0.08445985769865867	1.0
786970			787593	+	-	predicted RNA	antisense: gpmA	13080	13908	12971	20144194	16658833	18100288	792	29328	11602	12977	10116	17039369	15883714	15354736	749	25789	0.08453505512911533	1.0
	4612411	4613484		+	yjjU	b4377	putative patatin-like family phospholipase	15	28	15	23862	33741	21038	0	24	19	30	26	29209	37665	40526	0	33	0.0850285965201788	1.0
4168372			4168447	+	gltT	b3969	Glu tRNA	2	2	3	4170	2858	4500	1	50	0	2	1	1007	3367	1849	0	27	0.08504830973708956	1.0
461247			461104	-	-	predicted RNA	antisense: lon	2105	2049	2030	3241832	2455308	2833168	531	19746	1850	1836	1721	2717264	2247746	2612971	506	17541	0.08521594532690116	1.0
	4010200	4011000		+	yigL	b3826	pyridoxal phosphate phosphatase	39	44	33	60218	52974	46899	1	66	58	51	38	86304	62780	57859	2	86	0.0852650532428453	1.0
	3698214	3699893		+	bcsG	b3538	DUF3260 family inner membrane protein associated with cellulose production	67	93	52	104256	111467	73503	1	57	83	86	69	122609	106232	105774	1	66	0.085501075523634	1.0
1319710			1320096	+	-	predicted RNA	antisense: trpC trpD	4678	4519	5358	7204715	5413760	7476880	464	17308	4602	4907	4711	6759161	6006763	7150828	495	17154	0.08590018051037249	1.0
	853647	854765		+	ybiR	b0818	putative transporter	89	111	96	137281	133911	134043	3	120	65	79	87	95602	96689	132641	2	96	0.0859303225017426	1.0
	2352647	2354275		+	glpA	b2241	sn-glycerol-3-phosphate dehydrogenase (anaerobic), large subunit, FAD/NAD(P)-binding	11	2	0	17684	2756	0	0	4	1	3	3	2074	4251	5792	0	2	0.08619958165983742	1.0
4208132			4207880	-	-	predicted RNA	-	11216	6495	6723	17273308	7779801	9382288	1198	45369	7828	8814	6838	11497429	10788312	10379989	1251	43037	0.08620094820679278	1.0
	3433560	3432436		-	smf	b4473	DNA recombination-mediator A family protein	28	40	37	44064	49088	52365	1	43	27	22	27	39685	27230	41782	0	32	0.08629424046352814	1.0
3795979	3795979	3796938	3796938	+	waaC	b3621	ADP-heptose:LPS heptosyl transferase I	347	550	381	534798	658840	531880	16	599	465	545	399	683683	668072	605922	19	679	0.08631053454027665	1.0
	1664506	1665120		+	dmsD	b1591	twin-argninine leader-binding protein for DmsA and TorA	3	11	6	4845	13890	9388	0	15	6	13	11	9964	16264	17053	0	23	0.08731909462504639	1.0
	676711	677418		+	ybeR	b0645	uncharacterized protein	0	4	1	0	5696	2724	0	3	1	1	0	2587	1761	0	0	2	0.08738523949848985	1.0
	2088258	2087329		-	yeeY	b2015	LysR family putative transcriptional regulator	21	20	25	32782	24567	35736	0	33	13	19	15	19100	24301	22923	0	23	0.08742294415606612	1.0
2729341			2729565	+	-	predicted RNA	antisense: gltW	19553	11649	13735	30113012	13953321	19166212	2475	93677	14024	17691	11789	20596729	21653356	17894094	2607	89102	0.08758304599214166	1.0
	1604047	1605039		+	lsrD	b1515	autoinducer 2 import system permease protein	10	14	12	16732	17884	17612	0	17	24	15	12	36637	18896	18623	0	24	0.08774023328847623	1.0
	2339567	2340289		+	ubiG	b2232	bifunctional 3-demethylubiquinone-9 3-methyltransferase/ 2-octaprenyl-6-hydroxy phenol methylase	32	51	51	50519	61746	72430	2	85	37	38	29	55455	47449	44914	1	68	0.08781554541130364	1.0
	3248969	3249337		+	yqjC	b3097	DUF1090 family putative periplasmic protein	3	2	5	4845	3035	7183	0	13	2	3	1	3372	3820	1578	0	7	0.08908090657027998	1.0
659738			660275	+	-	predicted RNA	antisense: lipA	7336	8893	7715	11298831	10651817	10766138	550	20270	7323	8963	6818	10755216	10970703	10349249	579	19873	0.08922820751029804	1.0
	866364	865129		-	moeA	b0827	molybdopterin molybdenumtransferase; molybdopterin biosynthesis protein	7	8	7	11074	9908	11039	0	8	9	14	10	14036	17764	16250	0	12	0.08929039661277033	1.0
	2310405	2309341		-	ada	b2213	fused DNA-binding transcriptional dual regulator/O6-methylguanine-DNA methyltransferase	16	24	15	24736	28950	22302	0	23	22	25	25	32590	31460	39419	0	32	0.08955745429155451	1.0
1287622			1287538	-	tyrT	b1231	Tyr tRNA	1	0	0	2353	823	1172	0	17	1	2	1	1852	3530	2198	0	29	0.08997853303644192	1.0
2336814			2337105	+	-	predicted RNA	antisense: gyrA	4275	4615	4380	6583803	5527956	6112286	561	20803	4282	4415	3578	6289190	5403997	5430809	566	19547	0.08999967586366266	1.0
4605127			4605302	+	-	predicted RNA	antisense: fhuF	2146	2305	1994	3306428	2761984	2782693	453	16763	1956	2105	1722	2873019	2577424	2614366	443	15274	0.09007085074301417	1.0
1317708			1318572	+	-	predicted RNA	antisense: trpB trpC	16479	16123	17135	25379529	19312283	23910758	710	26436	16598	16560	14803	24376716	20268857	22468911	747	25862	0.0900907200685851	1.0
2928438			2928196	-	-	predicted RNA	antisense: sdaC	4196	4370	4640	6462986	5235075	6475030	671	24928	3795	4512	3867	5573864	5522921	5870446	675	23274	0.09011733142333109	1.0
	91032	91397		+	ftsL	b0083	membrane bound cell division protein at septum containing leucine zipper motif	8	9	9	12372	10929	12699	0	32	6	6	3	10160	7980	5076	0	21	0.09053151508190779	1.0
	2081262	2080789		-	sbmC	b2009	DNA gyrase inhibitor	16	18	19	24839	22015	27718	1	52	26	23	22	38259	28779	34490	2	71	0.09073167571492091	1.0
	3370350	3369475		-	nanK	b3222	N-acetylmannosamine kinase	7	3	6	10970	4341	8752	0	9	7	11	8	11526	13760	12543	0	14	0.09088192639148757	1.0
	3168246	3167851		-	mqsA	b3021	antitoxin for MqsR toxin; transcriptional repressor	7	14	15	11766	17878	21179	1	42	5	11	7	7590	14220	11601	0	28	0.090905782893806	1.0
	777740	779032		+	tolB	b0740	periplasmic protein	17	31	20	26302	37518	28445	0	23	28	34	26	41658	42341	40701	0	32	0.0915157160173525	1.0
	2013014	2012700		-	fliE	b1937	flagellar basal-body component	6	14	13	10252	17367	18941	1	49	16	16	14	23915	20106	22208	2	70	0.09156524786126118	1.0
1865745			1866463	+	-	predicted RNA	antisense: mipA	12243	12523	12226	18856030	15000197	17061390	636	23605	10465	11416	9224	15369817	13972507	14001448	583	20094	0.09177164230184288	1.0
	2266245	2267711		+	yeiQ	b2172	putative NAD-dependent D-mannonate oxidoreductase	30	39	40	47516	47270	56304	0	34	29	33	19	43510	41422	29684	0	26	0.09182016323155315	1.0
1913831			1914006	+	-	predicted RNA	antisense: prc	2180	2358	1956	3358401	2825316	2730583	457	16883	2096	2009	1738	3078671	2458967	2638224	447	15484	0.09191386527050269	1.0
	1977139	1976252		-	motA	b1890	proton conductor component of flagella motor	5	10	6	8825	12923	8867	0	11	10	11	11	15223	13788	17105	0	17	0.09210094295971745	1.0
2807914			2807535	-	-	predicted RNA	antisense: proX	5052	6089	5045	7780688	7294296	7040029	527	19399	5997	6659	4144	8807513	8150569	6289846	596	20392	0.09224584558534309	1.0
	318567	318331		-	rclB	b0303	reactive chlorine species (RCS) stress resistance periplasmic protein	1	7	1	1782	8962	2196	0	18	0	1	2	1067	2440	3803	0	10	0.09299419345488932	1.0
	1891267	1890572		-	tsaB	b1807	tRNA(ANN) t(6)A37 threonylcarbamoyladenosine modification protein; binding partner and protease for TsaD	2	4	5	4031	5825	7794	0	8	1	5	1	2219	6713	1587	0	5	0.09302130790111246	1.0
	1565733	1563334		-	dosP	b1489	oxygen sensor, c-di-GMP phosphodiesterase, heme-regulated; cold- and stationary phase-induced bioflim regulator	32	42	39	49982	50660	55445	0	21	25	38	23	37636	47258	35432	0	16	0.09332445005067128	1.0
3966052			3965678	-	-	predicted RNA	antisense: trxA	13463	12896	11750	20734028	15446753	16396267	1258	46735	10791	13734	9000	15848335	16810152	13661653	1205	41173	0.0934840046693171	1.0
	3586943	3587383		+	yhhA	b3448	DUF2756 family protein	67	74	70	104282	89369	98934	5	221	49	69	51	72054	84577	77555	5	177	0.0934891752334065	1.0
	3104433	3105512		+	mltC	b2963	membrane-bound lytic murein transglycosylase C	36	40	36	56774	49033	50738	1	48	22	43	23	32701	53081	35083	1	37	0.09362630843901218	1.0
	3259649	3258285		-	tdcG	b4471	L-serine dehydratase 3, anaerobic	14	17	14	22166	20409	20361	0	15	9	9	11	13302	12118	17498	0	10	0.09383760208851684	1.0
	1009964	1011871		+	uup	b0949	putative transporter subunit of ABC superfamily: ATP-binding component	11	18	12	16940	22621	17859	0	10	11	13	3	17161	16130	5294	0	6	0.09393690896490597	1.0
	2689506	2688793		-	yfhG	b2555	putative outer membrane protein modulating the QseEF response	8	4	4	13583	5070	6556	0	11	3	5	1	5396	7237	2948	0	7	0.09405818463777552	1.0
4158490	4158490	4159407	4160809	+	oxyR	b3961	oxidative and nitrosative stress transcriptional regulator	1322	1677	1448	2036840	2009364	2021946	59	2203	1496	1469	1319	2197096	1798860	2002320	62	2178	0.09417004135809537	1.0
	508218	508559		+	ybaQ	b0483	putative DNA-binding transcriptional regulator	40	54	33	62536	65448	46569	4	170	26	32	40	39284	39681	61618	3	137	0.09417103779450149	1.0
673313			673467	+	-	predicted RNA	antisense: leuS	1947	2204	2211	2999524	2639900	3085343	507	18762	1893	1864	1780	2780891	2281513	2701796	481	16697	0.09445208398688514	1.0
218677			218705	+	-	predicted RNA	antisense: proS	321	386	353	494990	463461	492676	452	16679	291	288	268	428082	352493	407196	394	13652	0.09448096340896783	1.0
	2703386	2702481		-	era	b2566	membrane-associated, 16S rRNA-binding GTPase	6	11	17	10304	13359	24225	0	17	6	9	6	10237	11312	10005	0	11	0.09474935131874476	1.0
	2963716	2963153		-	ppdB	b2825	putative prepilin peptidase-dependent protein	1	6	8	2024	7227	11724	0	12	7	6	9	10971	7973	14262	0	19	0.0952899708767797	1.0
	1049744	1049439		-	gfcA	b0987	O-antigen capsule production threonine-rich inner membrane protein	10	22	20	15824	27208	28503	2	77	27	24	17	40633	29791	26814	3	105	0.09546551307921212	1.0
	933224	937213		+	ftsK	b0890	DNA translocase at septal ring sorting daughter chromsomes	64	73	75	100000	88444	105342	0	24	68	88	83	101050	108673	126587	0	28	0.09592587853195886	1.0
1332958			1332642	-	-	predicted RNA	antisense: topA	4370	4819	4205	6731320	5772383	5868986	522	19319	4683	4578	3585	6878287	5603367	5441660	546	18846	0.0959987041713248	1.0
754444			754724	+	-	predicted RNA	antisense: gltA	4462	5240	3667	6872322	6277419	5117455	589	21669	4531	4944	3232	6654704	6051559	4906263	609	20892	0.0961205377038757	1.0
	1709142	1710200		+	rsxD	b1630	SoxR iron-sulfur cluster reduction factor component; putative membrane protein of electron transport complex	7	6	5	11161	8016	6993	0	8	8	1	1	11893	1952	2433	0	5	0.096457574974284	1.0
2521253			2521328	+	lysV	b2404	Lys tRNA	0	0	1	0	0	1618	0	7	0	0	0	640	219	0	0	3	0.09649884134650177	1.0
	2184516	2183716		-	thiD	b2103	bifunctional hydroxy-methylpyrimidine kinase/ hydroxy-phosphomethylpyrimidine kinase	40	54	48	62294	65591	67360	2	81	33	46	33	48565	56448	50453	1	64	0.0965637938649749	1.0
	43188	44129		+	fixB	b0042	putative electron transfer flavoprotein, NAD/FAD-binding domain and ETFP adenine nucleotide-binding domain-like protein	4	14	7	7631	17816	10395	0	12	5	9	2	8444	11276	3576	0	8	0.09684016126339426	1.0
3507711	3507701	3507348	3507348	-	yhfU	b3378	DUF2620 family protein	60	83	76	93701	100190	107299	7	283	76	84	83	112815	102992	126038	9	321	0.09699064905949946	1.0
	728732	727059		-	kdpA	b0698	potassium translocating ATPase, subunit A	5	8	15	8487	9582	22260	0	8	6	6	5	10143	7463	8784	0	5	0.09708041385639546	1.0
	40386	39244		-	caiA	b0039	crotonobetaine reductase subunit II, FAD-binding	6	6	3	10520	7547	4277	0	6	7	11	6	11603	14198	9333	0	10	0.09715757156225105	1.0
	246712	247461		+	yafL	b0227	putative lipoprotein and C40 family peptidase	8	19	13	13168	22832	18487	0	24	13	11	1	19620	13845	2948	0	16	0.09747556812300881	1.0
	1030668	1030339		-	tusE	b0969	mnm(5)-s(2)U34-tRNA 2-thiolation sulfurtransferase	47	41	34	72858	49564	48749	4	172	42	35	21	62576	43155	31873	4	138	0.09750268426043951	1.0
	2947178	2946081		-	mltA	b2813	membrane-bound lytic murein transglycosylase A	37	37	25	58271	44555	34926	1	41	38	50	35	56796	61839	54535	1	52	0.09751770794525381	1.0
3427152			3427076	-	ileU	b3277	Ile tRNA	0	0	2	1245	524	3071	0	20	1	2	1	1767	3537	3009	1	35	0.09773331090567369	1.0
4037141			4037217	+	ileT	b3852	Ile tRNA	0	0	2	1245	524	3071	0	20	1	2	1	1767	3537	3009	1	35	0.09773331090567369	1.0
	1682882	1684183		+	rstB	b1609	sensory histidine kinase of RstAB two-component system, low Mg-responsive via PhoQP	34	54	35	52751	65462	49417	1	42	51	51	52	76169	63027	79003	1	55	0.09774209625021743	1.0
	4100525	4099491		-	rhaT	b3907	L-rhamnose:proton symporter	20	34	25	31259	41697	35992	0	35	28	46	29	41171	57297	44879	1	46	0.09777250794845646	1.0
	2794253	2795653		+	gabP	b2663	gamma-aminobutyrate transporter	44	48	40	68904	57649	56287	1	43	36	41	28	54072	50272	43152	1	35	0.09828801789635179	1.0
	1044676	1044230		-	etp	b0982	Protein-tyrosine-phosphatase, role in O-antigen capsule formation; dephosphorylates Etk-P	10	17	8	16378	21165	11378	1	36	17	15	16	25076	19334	24528	1	51	0.09832526598785074	1.0
	2570337	2569501		-	eutJ	b2454	ethanolamine utilization protein, HSP70/actin superfamily protein	3	4	4	5900	4791	5878	0	6	5	6	7	7556	7937	11610	0	10	0.0984210189601786	1.0
673041			673206	+	-	predicted RNA	antisense: leuS	2176	2169	2036	3352353	2598672	2841747	475	17656	1844	1955	1792	2708563	2392953	2720141	454	15706	0.09843543367133524	1.0
	4505287	4506405		+	yjhC	b4280	putative oxidoreductase	35	57	42	55096	68926	58690	1	54	60	62	50	89497	76250	76203	2	72	0.0984387503982948	1.0
1167043			1166089	-	-	predicted RNA	antisense: ndh	12202	14577	13441	18792282	17460249	18756650	520	19200	13946	12323	11572	20481753	15083148	17564244	534	18544	0.0988353517341145	1.0
2085715			2086394	+	-	predicted RNA	antisense: plaP	9649	9940	9969	14861039	11906519	13911196	537	19940	8613	8794	8278	12649812	10763650	12565753	509	17636	0.09909236127565477	1.0
	847119	846460		-	glnP	b0810	glutamine transporter subunit	5	3	6	8254	3674	8678	0	10	4	11	7	7035	13724	11775	0	16	0.09916032043972865	1.0
2153439	2153408	2153349	2153333	-	ibsA	b4667	toxic membrane protein	20	29	20	30913	35654	29180	14	531	24	37	30	35928	46105	45987	20	711	0.09973862155241597	1.0
	3648935	3650224		+	arsB	b3502	arsenite/antimonite transporter	65	82	58	100977	99217	81083	1	72	55	68	39	81036	83933	59699	1	58	0.09995395284198248	1.0
1321774			1321902	+	-	predicted RNA	antisense: trpE	1229	1303	1559	1893294	1560759	2176715	391	14549	1203	1452	1450	1766854	1777693	2201962	429	14848	0.10035765404445839	1.0
3964077			3964251	+	-	predicted RNA	antisense: gpp	2095	2450	2143	3227496	2935374	2991082	472	17436	2199	2376	1646	3229755	2908517	2498508	479	16451	0.10042350100060071	1.0
	1917510	1920143		+	yebT	b1834	MCE domain protein	32	49	43	49844	59452	60374	0	21	26	36	34	38695	44648	53053	0	17	0.10056169804255305	1.0
2284476			2284447	-	-	predicted RNA	antisense: yejM	353	420	345	544306	503470	481950	461	16996	309	361	255	454226	442079	388529	416	14275	0.1010532995230853	1.0
	3349809	3349081	3340228	-	mtgA	b3208	biosynthetic peptidoglycan transglycosylase	1330	1541	1497	2049636	1846236	2089876	74	2736	1294	1630	1340	1901417	1995925	2034734	78	2712	0.1010603954701306	1.0
	2550545	2549646		-	yfeX	b2431	porphyrinogen oxidase, cytoplasmic	19	35	42	30005	41969	59871	1	48	19	22	28	27971	27520	42829	1	36	0.10111574611385497	1.0
	782085	783128		+	nadA	b0750	quinolinate synthase, subunit A	17	27	27	27106	32822	38675	0	31	26	33	34	38336	40459	52433	1	41	0.10111585069176343	1.0
	945871	947019		+	ycaD	b0898	putative MFS-type transporter	9	12	15	14440	14999	21897	0	14	17	19	15	25443	23721	22810	0	20	0.1014605644493591	1.0
2060914	2060914	2059964	2059855	-	cbl	b1987	ssuEADCB/tauABCD operon transcriptional activator	1666	3015	2283	2566551	3611337	3186219	90	3282	2045	2359	2265	3004158	2888418	3438058	94	3270	0.10150144538973196	1.0
	822498	821542		-	ybhN	b0788	UPF0104 family inner membrane protein	45	71	47	70756	85095	66220	2	77	66	86	56	97856	105617	86470	2	100	0.10156696234911877	1.0
3330615			3331140	+	-	predicted RNA	antisense: obgE	6613	7594	5938	10185222	9096549	8286342	474	17470	8320	8008	5325	12219151	9801379	8083225	554	19077	0.10171699834563129	1.0
	2817503	2816937		-	yqaB	b2690	fructose-1-P and 6-phosphogluconate phosphatase	2	9	5	3893	11909	8083	0	14	2	3	4	3457	3933	7458	0	8	0.10186784964454546	1.0
	1175427	1176626		+	lolC	b1116	lipoprotein-releasing system transmembrane protein	14	17	18	22010	21151	26133	0	19	11	11	11	16419	14467	17236	0	13	0.10225065805625733	1.0
	3447767	3447453		-	rplX	b3309	50S ribosomal subunit protein L24	30	46	62	46643	55634	87424	5	200	56	72	52	83188	88652	79099	7	265	0.10283229215219085	1.0
	4132616	4133506		+	metF	b3941	5,10-methylenetetrahydrofolate reductase	62	92	70	95665	110868	98389	3	114	63	94	88	93229	115833	134813	3	128	0.10315693330674844	1.0
3679419	3679419	3680348		+	kdgK	b3526	2-dehydro-3-deoxygluconokinase	177	220	266	274000	263699	372240	8	326	160	168	183	234998	205935	278236	7	257	0.10353804354028244	1.0
	2032317	2030899		-	dcm	b1961	DNA cytosine methyltransferase	13	17	10	20963	21539	14895	0	13	18	23	15	27663	29097	22871	0	18	0.10361300029815339	1.0
762955			762215	-	-	predicted RNA	antisense: sucB	10784	11095	10732	16608652	13289233	14975947	544	20186	9610	10110	8121	14113114	12374672	12326596	506	17460	0.10375234907599262	1.0
	2087062	2085704		-	plaP	b2014	putrescine importer, low affinity	22	24	25	34201	28841	34926	0	24	19	15	15	28586	19186	23665	0	17	0.10387345482041292	1.0
	3149471	3148977		-	yqhA	b3002	UPF0114 family putative inner membrane protein	10	11	10	16594	13182	14466	0	29	15	15	13	22609	19186	20603	1	42	0.10393194179269402	1.0
	1333855	1334829		+	cysB	b1275	N-acetylserine-responsive cysteine regulon transcriptional activator; autorepressor	22	33	36	35014	40533	51374	1	43	16	21	29	23949	26034	44495	0	32	0.10413109880147331	1.0
3516279			3517137	+	-	predicted RNA	antisense: damX	11667	13560	12535	17968523	16242861	17492164	543	20063	11816	12235	10051	17353304	14975259	15255905	535	18465	0.10441781695153114	1.0
	1668564	1667344		-	mlc	b1594	glucosamine anaerobic growth regulon transcriptional repressor; autorepressor	65	87	71	100432	105008	99785	2	83	84	86	74	123941	106098	113817	2	93	0.10470923524150132	1.0
	3076182	3075217		-	yggF	b2930	fructose 1,6 bisphosphatase isozyme	10	7	13	16611	9064	19494	0	15	15	15	14	22942	18896	21711	0	21	0.10494644594087148	1.0
	1800638	1800096		-	infC	b1718	translation initiation factor IF-3	20	25	27	32116	30121	38378	1	61	42	36	17	61953	44881	26343	2	81	0.10507613363967043	1.0
	1774686	1775444		+	aroD	b1693	3-dehydroquinate dehydratase	2	3	2	3711	3851	3459	0	4	1	1	1	1622	2433	2032	0	2	0.10538082183035338	1.0
671827			671956	+	-	predicted RNA	antisense: lptE	1839	2044	1790	2832574	2448489	2497836	539	19945	1548	1868	1448	2274564	2286402	2197854	504	17330	0.10540405566821405	1.0
	179237	180754		+	dgt	b0160	deoxyguanosine triphosphate triphosphohydrolase	17	25	31	27582	30509	43390	0	22	30	33	31	45218	40643	48246	0	29	0.10591562092685182	1.0
	710725	710639		-	uof	b4637	ryhB-regulated fur leader peptide	3	2	3	4663	3416	4731	1	49	6	4	3	9622	5935	5539	2	80	0.1060021310310156	1.0
	1475144	1477450		+	ydbD	b1407	PF10971 family putative periplasmic methylglyoxal resistance protein	11	8	6	17658	10106	9528	0	5	16	14	7	24308	17658	11810	0	7	0.10606978079633526	1.0
1129830	1129830	1129414	1127804	-	flgN	b1070	export chaperone for FlgK and FlgL	310	313	311	478170	375472	434332	27	1029	218	266	259	321601	326466	394303	24	833	0.10631663149963162	1.0
	1647934	1648341		+	dicA	b1570	Qin prophage; putative regulator for DicB	3	4	3	5147	5226	4912	0	12	0	4	1	1152	5383	2625	0	7	0.10650539157858875	1.0
	2262365	2261427		-	fruK	b2168	fructose-1-phosphate kinase	11	7	3	18143	8411	4549	0	11	7	9	15	11483	11128	23377	0	16	0.10725108074108959	1.0
	788837	787797		-	galM	b0756	aldose 1-epimerase; type-1 mutarotase	40	39	27	62086	47352	38725	1	47	34	58	40	50606	71750	62107	1	59	0.10786872518046568	1.0
	2634070	2632604		-	guaB	b2508	IMP dehydrogenase	32	46	54	50804	56281	75600	1	41	32	35	38	47438	42879	57903	0	33	0.10798313902626819	1.0
	2025511	2026326		+	yedP	b1955	putative mannosyl-3-phosphoglycerate phosphatase	69	104	83	107639	124914	115927	3	142	65	84	66	96789	103084	101421	3	123	0.10825964705718098	1.0
	2579636	2581639		+	tktB	b2465	transketolase 2, thiamine triphosphate-binding	26	39	40	41027	47420	56865	0	24	45	39	42	67426	48857	64549	0	30	0.10836954020814896	1.0
	3774424	3775572		+	mtlD	b3600	mannitol-1-phosphate dehydrogenase, NAD-dependent	50	39	46	77712	47835	64280	1	55	40	34	33	59981	41881	51116	1	44	0.10893831312335603	1.0
	2824346	2823849		-	pncC	b2700	nicotinamide-nucleotide amidohydrolase; NMN amidohydrolase	13	16	17	20557	20076	24275	1	43	12	11	8	18177	13689	13232	0	30	0.1089472023328935	1.0
	3475718	3475332		-	tusD	b3345	sulfurtransferase for 2-thiolation step of mnm(5)-s(2)U34-tRNA synthesis	7	16	18	12259	19252	25249	1	48	10	25	21	14873	31234	32388	1	67	0.10903239737034248	1.0
575999			576732	+	-	predicted RNA	-	9189	8787	9368	14152240	10525493	13073511	460	17144	7546	8485	8944	11082223	10385779	13575575	459	15914	0.1095302061437641	1.0
1879255	1879255	1879007		-	yeaQ	b1795	UPF0410 family protein	51	65	56	79806	78834	79060	8	318	46	47	40	68579	57637	61566	7	251	0.1096536040081539	1.0
758146			757366	-	-	predicted RNA	antisense: sdhB sdhA	11774	14433	10780	18133258	17288076	15042762	586	21538	12234	13095	8165	17967580	16027675	12394181	578	19799	0.10965775234119061	1.0
	2962764	2962441		-	ppdC	b2823	putative prepilin peptidase-dependent protein	3	6	3	5667	7724	5400	0	19	2	2	3	3278	3056	5111	0	11	0.10988339414795373	1.0
	1817135	1816386		-	chbG	b1733	chito-oligosaccharide deacetylase	5	8	7	8254	9799	10023	0	12	3	4	4	5191	5631	7074	0	7	0.1099691673158899	1.0
	3575071	3575664		+	yhgN	b3434	UPF0056 family inner membrane protein	44	43	40	68281	52198	56395	2	99	44	30	27	64865	37318	41878	2	80	0.10998429641215875	1.0
	2670390	2670908		+	hcaF	b2539	3-phenylpropionate dioxygenase, small (beta) subunit	1	6	7	2621	8016	10502	0	13	9	9	5	13558	11347	7990	0	21	0.11097485094332135	1.0
	2760547	2761173		+	yfjJ	b2626	CP4-57 prophage; uncharacterized protein	29	31	38	44800	37532	53529	1	72	24	20	26	36338	25588	40605	1	54	0.1110023698078812	1.0
218537			218570	+	-	predicted RNA	antisense: proS	365	432	385	562779	518415	538196	430	15876	370	343	334	544492	420806	507327	416	14437	0.11101529124833226	1.0
845960			846172	+	-	predicted RNA	antisense: glnQ	2099	2555	2226	3233535	3061086	3106308	399	14711	2178	2339	2061	3199786	2863063	3129091	416	14384	0.11105177293404912	1.0
	3109155	3107020		-	speC	b2965	ornithine decarboxylase, constitutive	31	50	34	48944	60106	48649	0	24	30	35	23	44415	43685	35982	0	19	0.11118032880578829	1.0
	2178821	2180098		+	yegT	b2098	nucleoside transporter, low affinity	4	9	9	6393	11807	13434	0	8	8	12	12	12696	15366	18414	0	12	0.11133805862911077	1.0
	2104509	2103391		-	wbbK	b2032	lipopolysaccharide biosynthesis protein	11	8	16	17425	10705	23441	0	15	13	5	6	19151	6374	9141	0	10	0.1116855790958578	1.0
	2437851	2436715		-	pdxB	b2320	erythronate-4-phosphate dehydrogenase	7	11	12	11360	14284	17727	0	12	7	10	3	11150	12783	4963	0	8	0.11178600570755379	1.0
	3376776	3376279		-	sspB	b3228	ClpXP protease specificity enhancing factor	6	7	4	10226	8819	6044	0	16	10	15	2	16145	18486	3628	0	25	0.11212302807856288	1.0
	953554	951272		-	pflB	b0903	formate C-acetyltransferase 1, anaerobic; pyruvate formate-lyase 1	60	87	77	93355	105185	107571	1	44	81	98	67	120039	120488	102930	1	50	0.11228681104204741	1.0
	2178564	2177512		-	fbaB	b2097	fructose-bisphosphate aldolase class I	34	43	30	52768	52055	41871	1	46	39	51	40	57300	63162	61523	1	57	0.11265908835516805	1.0
	3014239	3012614		-	yqeB	b2875	XdhC-CoxI family protein with NAD(P)-binding Rossman fold	25	23	21	38838	27569	29650	0	19	22	30	37	32385	37828	56891	0	26	0.11285878048133605	1.0
	3910398	3909439		-	pstC	b3727	phosphate transporter subunit	35	46	39	54507	56029	55420	1	57	32	32	30	47771	39327	46580	1	46	0.11300387961504157	1.0
	2029366	2028449		-	yedI	b1958	DUF808 family inner membrane protein	4	6	8	7051	7731	12253	0	9	3	4	4	5046	4931	7257	0	6	0.11317773393243175	1.0
225500			225575	+	alaV	b0203	Ala tRNA	0	0	0	8	176	511	0	3	0	0	0	153	665	471	0	5	0.11320882702254641	1.0
2338640			2339373	+	-	predicted RNA	antisense: gyrA	10594	10851	9679	16315928	12997039	13507315	524	19446	9482	9786	8033	13925375	11977403	12193545	501	17300	0.11346633530359351	1.0
	3793987	3794919		+	hldD	b3619	ADP-L-glycero-D-mannoheptose-6-epimerase, NAD(P)-binding	27	60	32	42775	71927	44884	1	57	57	54	33	84076	66416	51195	2	72	0.1134711879386103	1.0
	3235875	3234739		-	rlmG	b3084	23S rRNA m(2)G1835 methyltransferase, SAM-dependent	8	20	12	13073	24533	17653	0	16	21	18	14	31711	22851	21720	0	22	0.11405982037604513	1.0
	3786838	3788097		+	envC	b3613	activator of AmiB,C murein hydrolases, septal ring factor	26	25	24	41512	30828	34456	0	28	16	27	13	24778	33526	20978	0	20	0.11408944573278523	1.0
	268960	268097		-	ykfA	b0253	CP4-6 prophage; putative GTP-binding protein	69	89	66	106869	107268	92816	3	118	71	101	75	105285	124188	114419	3	132	0.11450280174802874	1.0
	480308	480090		-	hha	b0460	modulator of gene expression, with H-NS	2	2	3	3962	2599	4954	0	17	5	6	1	7795	7845	2904	0	28	0.11457390254522105	1.0
25052			24279	-	-	predicted RNA	antisense: ileS	11215	13247	12583	17273074	15867020	17559251	591	21834	11935	12243	10341	17528466	14985397	15695830	601	20762	0.11457393798630403	1.0
	1831982	1830762		-	astC	b1748	succinylornithine transaminase, PLP-dependent	9	3	7	15132	4260	10742	0	8	3	4	5	5344	5504	8670	0	5	0.11475291942673717	1.0
	2334959	2334336		-	yfaT	b2229	DUF1175 family protein, putative host defense protein	11	15	7	17278	19028	10362	0	24	5	8	9	7599	9847	13904	0	16	0.11476828929146814	1.0
696616			696542	-	glnV	b0665	Gln tRNA	0	0	1	657	592	1486	0	12	1	1	0	2416	1358	1229	0	22	0.11478112304139401	1.0
4040517			4040636	+	rrfA	b3855	5S ribosomal RNA of rrnA operon	1	5	3	2976	6880	4260	1	39	0	3	2	1331	3968	3157	0	23	0.11501145320234267	1.0
	2114327	2113434		-	wcaN	b2042	putative regulatory subunit for GalU	42	43	24	66006	52041	34002	1	56	46	44	43	68775	53972	66181	2	70	0.11510162541905439	1.0
	3499448	3499615		+	yhfL	b3369	small lipoprotein	0	0	0	0	1177	90	0	2	0	0	0	939	1131	453	0	5	0.11515684084309777	1.0
	2089465	2089211		-	yoeB	b4539	toxin of the YoeB-YefM toxin-antitoxin system	12	15	11	19268	18136	16398	1	70	14	16	21	21209	20622	32501	2	97	0.11517230238665681	1.0
	968366	969352		+	lpxK	b0915	lipid A 4'kinase	3	4	6	5476	5389	9156	0	6	8	8	5	13174	10123	7868	0	10	0.11524768490218061	1.0
	3751868	3751128		-	yiaT	b3584	putative outer membrane protein	3	9	12	5718	11651	16918	0	15	7	14	13	11279	17361	21065	0	22	0.11553020269937861	1.0
	4348744	4347404		-	dcuB	b4123	C4-dicarboxylate transporter, anaerobic; DcuS co-sensor	30	31	20	47265	37695	28948	0	28	25	16	18	37380	19674	27896	0	21	0.11553669308758903	1.0
	2863593	2864231		+	ygbL	b2738	putative class II aldolase	36	39	24	56212	47509	34241	1	71	22	33	20	33691	40410	30643	1	54	0.11601075035889112	1.0
	577398	577613		+	essD	b0554	DLP12 prophage; putative phage lysis protein	54	50	42	83535	60711	58773	8	313	38	50	29	55814	61499	45184	7	250	0.11605461541229975	1.0
3964832			3965598	+	-	predicted RNA	antisense: rhlB	11529	13737	11850	17755658	16454396	16536421	598	22054	11843	13721	9598	17393673	16793625	14568440	618	21188	0.11617715997854776	1.0
	1051461	1051673		+	cspG	b0990	cold shock protein homolog, cold-inducible	13	9	16	21422	10834	22888	2	86	17	25	12	25922	30647	19408	3	118	0.11648922820030107	1.0
	2452336	2451584		-	yfcS	b2336	putative periplasmic pilin chaperone	6	8	8	9923	9908	11526	0	13	10	2	1	15001	3211	2267	0	9	0.11651586449184466	1.0
1318828			1319516	+	-	predicted RNA	antisense: trpC	8460	7741	9159	13029088	9272886	12782041	454	16973	8388	8176	7762	12319065	10007470	11781350	476	16501	0.11720378105543523	1.0
3331194			3332371	+	-	predicted RNA	antisense: yhbE obgE	15010	17763	14383	23117667	21276507	20071439	495	18241	17703	18057	12247	25998599	22100233	18589244	549	18870	0.11791444947001704	1.0
2806013			2805057	-	-	predicted RNA	antisense: proV proW	14037	15347	13458	21619051	18382782	18779828	553	20474	14522	17929	11625	21326741	21944662	17644748	621	21217	0.11794250141410881	1.0
	1193773	1192667		-	mnmA	b1133	tRNA(Gln,Lys,Glu) U34 2-thiouridylase, first step in mnm(5)-s(2)U34-tRNA synthesis	12	19	16	19371	22988	22822	0	19	10	14	8	15044	18146	12491	0	13	0.11807081918214091	1.0
3183793			3184637	+	-	predicted RNA	antisense: ribB	12292	14106	11135	18931891	16896495	15538370	550	20263	12057	15461	9564	17707385	18923162	14517524	591	20176	0.11928512197958292	1.0
	3850136	3848634		-	uhpB	b3668	sensory histidine kinase in two-component regulatory sytem with UhpA	9	28	23	15045	33843	32127	0	17	26	26	23	39506	32904	35040	0	23	0.11938914594077207	1.0
	1429049	1432411		+	stfR	b1372	Rac prophage; putative tail fiber protein	50	85	65	77850	102769	91941	0	27	51	64	43	75145	78372	65963	0	21	0.11988175325414696	1.0
	1315224	1314718		-	yciE	b1257	putative rubrerythrin/ferritin-like metal-binding protein	4	8	9	7207	10208	13838	0	20	3	9	1	5831	12033	2625	0	13	0.1199459088842114	1.0
	2700998	2700618		-	acpS	b2563	holo-[acyl-carrier-protein] synthase 1	6	17	4	9482	21097	6291	0	32	3	10	4	5618	12465	6585	0	21	0.12003931969440045	1.0
	2670908	2671228		+	hcaC	b2540	3-phenylpropionate dioxygenase, ferredoxin subunit	0	4	3	908	5097	5474	0	11	6	6	0	9605	7732	1029	0	19	0.12009534374089922	1.0
	1488232	1489671		+	aldA	b1415	aldehyde dehydrogenase A, NAD-linked	64	90	77	99229	108615	108380	1	73	72	97	85	106318	119009	129579	2	82	0.1201871473425477	1.0
	1934604	1932793		-	edd	b1851	6-phosphogluconate dehydratase	20	27	24	31874	32618	34167	0	18	17	21	14	25145	25871	22069	0	13	0.12026415758916646	1.0
2044549			2044624	+	asnT	b1977	Asn tRNA	0	1	0	519	1524	825	0	12	2	0	0	4175	834	113	0	22	0.12029109265937014	1.0
	2553225	2554124		+	hemF	b2436	coproporphyrinogen III oxidase	34	34	28	53815	41642	39303	1	49	34	48	37	50076	59589	57667	1	61	0.12041585567937733	1.0
1746435			1746511	+	valV	b1665	Val tRNA	0	0	0	0	0	495	0	2	0	0	0	0	374	593	0	4	0.12068844924867281	1.0
	3398875	3398387		-	mreD	b3249	cell wall structural complex MreBCD transmembrane component MreD	12	13	12	18714	16047	17190	0	35	15	25	12	22037	30739	18789	1	48	0.12081565802916203	1.0
	669036	668719		-	rsfS	b0637	ribosomal silencing factor	0	1	2	0	1667	2832	0	4	2	1	0	4345	1634	1500	0	7	0.12094860298233741	1.0
1182322			1182663	+	-	predicted RNA	antisense: potD	4192	4300	4284	6456722	5151333	5978944	461	17141	3841	3881	3539	5641905	4750703	5372365	444	15365	0.1213158995645482	1.0
	2269979	2270545		+	mepS	b2175	murein DD-endopeptidase, space-maker hydrolase, mutational suppressor of prc thermosensitivity, outer membrane lipoprotein	5	8	7	8513	10289	9990	0	16	2	7	3	4106	9423	5146	0	10	0.12141280402717451	1.0
	3439130	3438705		-	zntR	b3292	zntA gene transcriptional activator	58	86	91	89358	104056	127891	6	251	63	79	52	93288	97750	79762	6	211	0.12213502891689543	1.0
4407493			4406964	-	-	predicted RNA	antisense: rnr	5908	7485	5807	9099221	8965536	8104045	448	16458	8068	8337	5290	11848966	10204902	8029867	551	18920	0.12234600699007743	1.0
	3030931	3029012		-	ygfT	b2887	putative oxidoreductase, Fe-S subunit/nucleotide-binding subunit	43	61	62	66663	73254	87094	1	39	39	49	41	57522	60728	62744	0	31	0.12266914300040803	1.0
	742827	743570		+	ybgI	b0710	NIF3 family metal-binding protein	0	2	7	449	2817	9834	0	5	8	4	2	11987	6013	3157	0	9	0.1228491237118659	1.0
	2061933	2061016		-	nac	b1988	nitrogen assimilation regulon transcriptional regulator; autorepressor	48	114	49	74788	136586	69424	2	101	55	70	38	82206	86770	58827	2	82	0.1228733349490458	1.0
	3413465	3412803		-	acrS	b3264	acrAB operon transcriptional repressor	37	39	32	57077	47060	44752	2	74	24	29	28	35920	35995	43545	1	58	0.1233750487266212	1.0
	3109553	3110260		+	yqgA	b2966	DUF554 family putative inner membrane protein	17	19	20	27461	23948	28073	1	37	19	25	29	29320	31545	44234	1	49	0.12373574708875715	1.0
3924547			3924888	+	-	predicted RNA	antisense: mnmG	3676	4971	4286	5662718	5955260	5981009	467	17153	3894	4131	3404	5719492	5056257	5167742	450	15539	0.12386240263356556	1.0
497838			497218	-	-	predicted RNA	antisense: adk	10982	11107	10448	16914275	13304369	14580108	648	24046	9327	11473	8520	13697967	14041995	12932257	636	21831	0.12440901377058251	1.0
	4192635	4191865		-	thiG	b3991	thiamine biosynthesis ThiGH complex subunit	10	27	19	15452	33006	26967	0	32	26	27	18	38268	33703	27904	1	43	0.12448292790527433	1.0
	4098646	4099494		+	rhaR	b3906	transcriptional activator of rhaSR	62	57	63	95578	68436	88027	2	98	51	48	44	75110	59702	66887	2	79	0.1255286499171353	1.0
	4385704	4386018	4391571	+	yjeO	b4158	inner membrane protein	353	405	384	543718	485211	536347	44	1656	351	419	357	516444	513328	542847	48	1664	0.12625611307424933	1.0
	1340558	1341727		+	yciM	b1280	envelope integrity maintenance protein; EnvC-interacting protein	10	9	9	16248	11480	12856	0	11	7	9	3	10689	11800	4849	0	7	0.1264123282499819	1.0
	1035066	1035773		+	hyaC	b0974	hydrogenase 1, b-type cytochrome subunit	3	7	3	5597	9377	5490	0	9	9	7	5	13533	9402	8496	0	14	0.12667696828989963	1.0
4629494			4629774	+	-	predicted RNA	antisense: yjjK	4198	4492	4044	6466170	5380536	5643398	560	20747	3818	3724	3419	5607889	4559016	5189872	526	18216	0.12667740651476325	1.0
	3801999	3800983		-	waaJ	b3626	UDP-D-glucose:(galactosyl)lipopolysaccharide glucosyltransferase	12	29	20	19890	35327	29180	0	27	11	19	13	16734	23919	20961	0	20	0.12679223888216923	1.0
	4436755	4437495		+	cysQ	b4214	3'(2'),5'-bisphosphate nucleotidase	8	22	28	12735	27494	40236	0	36	12	19	10	18886	23254	16181	0	26	0.1268059818438254	1.0
	3492297	3491725		-	ppiA	b3363	peptidyl-prolyl cis-trans isomerase A (rotamase A)	12	13	8	18688	16374	12484	0	27	8	7	6	12841	9090	10397	0	18	0.12688830084682579	1.0
	2933013	2931865		-	fucO	b2799	L-1,2-propanediol oxidoreductase	64	102	87	98719	123342	121418	2	99	84	95	117	124453	116314	179003	3	121	0.12710769999984187	1.0
707286			707147	-	-	predicted RNA	antisense: glnS	1883	1936	1818	2901418	2319674	2537998	498	18474	1601	1720	1446	2351485	2106147	2195350	459	15840	0.12710983228446862	1.0
	94650	96008		+	murF	b0086	UDP-N-acetylmuramoyl-tripeptide:D-alanyl-D-alanine ligase	16	22	14	25134	27085	20369	0	17	15	32	22	22173	39978	33975	0	23	0.12758531468490789	1.0
	556873	556661		-	ybcJ	b0528	ribosome-associated protein; putative RNA-binding protein	42	45	45	65184	54069	62843	7	284	37	38	30	55498	47102	46641	6	233	0.12766527250281964	1.0
	2776386	2776868		+	yfjY	b2644	CP4-57 prophage; putative DNA repair protein	13	13	12	21387	16503	17901	1	38	14	21	18	20824	26515	28768	1	52	0.1278635995025532	1.0
	2243652	2242984		-	folE	b2153	GTP cyclohydrolase I	1	9	8	1574	11235	11790	0	12	1	5	4	2527	6331	7013	0	7	0.1284297986838405	1.0
158652			158775	+	-	predicted RNA	antisense: pcnB	1438	1755	1626	2214734	2102524	2269911	480	17707	1490	1656	1270	2189301	2027265	1927896	480	16517	0.12844636849237545	1.0
	4076146	4077018		+	yihY	b3886	BrkB family putative transporter, inner membrane protein	32	28	20	50501	34143	28527	1	43	19	25	16	28799	31609	24842	0	32	0.12957084076829997	1.0
	909294	908293		-	ltaE	b0870	L-allo-threonine aldolase, PLP-dependent	11	8	8	17996	10602	12451	0	13	16	16	8	23693	20764	12595	0	18	0.12985461565424516	1.0
	2111976	2111077		-	rfbD	b2040	dTDP-4-dehydrorhamnose reductase subunit, NAD(P)-binding, of dTDP-L-rhamnose synthase	19	24	28	30783	29597	39476	0	36	24	39	29	36116	48715	45184	1	48	0.1302616403609517	1.0
1257483			1257791	+	-	predicted RNA	antisense: ychF	3922	4439	4315	6040145	5317394	6021451	507	18747	3442	3785	3358	5056053	4633717	5097400	462	15951	0.13095751321595167	1.0
	3704761	3703859		-	dppC	b3542	dipeptide/heme transporter	8	17	13	12891	20845	19263	0	19	8	9	8	12175	11255	13136	0	13	0.13144427338136846	1.0
	465547	464852		-	queC	b0444	7-cyano-7-deazaguanine (preQ0) synthase; queuosine biosynthesis	77	101	98	120038	122083	137304	4	181	68	74	84	100418	91630	127547	4	153	0.13171868875388298	1.0
	2427791	2427009		-	argT	b2310	lysine/arginine/ornithine transporter subunit	4	6	3	6497	7404	4929	0	8	9	5	6	13362	6176	9525	0	12	0.13229168231628044	1.0
	2459159	2457015		-	fadJ	b2341	fused enoyl-CoA hydratase and epimerase and isomerase/3-hydroxyacyl-CoA dehydrogenase	20	20	25	31372	24785	35942	0	14	30	30	25	44535	36894	39183	0	18	0.1324383682930455	1.0
	996944	995985		-	ssuA	b0936	aliphatic sulfonate binding protein, SsuABC ABC transporter	6	5	3	10763	5988	4871	0	7	6	10	7	9537	12239	11095	0	11	0.13289630596455038	1.0
157752			158560	+	-	predicted RNA	antisense: pcnB	10565	12213	11108	16271439	14628372	15500866	517	19118	10550	11757	9214	15494509	14389656	13985825	525	18075	0.13290923176174765	1.0
	1638109	1637954		-	ynfN	b1551	Qin prophage; cold shock-induced protein	0	1	0	1228	2089	115	0	7	1	1	1	2023	1669	2041	0	12	0.13296545081444508	1.0
	2551726	2551277		-	yfeZ	b2433	inner membrane protein	2	6	4	3339	7397	6828	0	13	5	7	6	8290	9727	9342	0	20	0.1333893231885405	1.0
	1533052	1533285		+	pptA	b1461	4-oxalocrotonate tautomerase	0	4	1	562	4852	2741	0	11	3	4	1	5165	5737	2145	0	18	0.13346312025146953	1.0
	39115	37898		-	caiB	b0038	crotonobetainyl CoA:carnitine CoA transferase	16	24	25	25385	29522	35917	0	24	20	8	17	30225	10392	26753	0	18	0.13351174882904504	1.0
	2606262	2606912		+	hyfE	b2485	hydrogenase 4, membrane subunit	12	28	21	18973	33571	30517	1	42	32	21	22	47489	26819	34691	1	55	0.13352561917974046	1.0
	113219	112599		-	coaE	b0103	dephospho-CoA kinase	74	93	73	114959	111787	102138	4	176	78	117	78	115590	143551	119269	5	203	0.13367125160821475	1.0
	4395585	4396046		+	tsaE	b4168	tRNA(ANN) t(6)A37 threonylcarbamoyladenosine modification protein; ADP binding protein	5	4	8	8011	5526	12385	0	18	4	2	5	6267	2716	7868	0	12	0.13376326611036188	1.0
4404253			4403626	-	-	predicted RNA	antisense: hflC	8979	9457	8462	13829416	11327609	11809305	530	19621	9197	9362	7079	13507564	11459441	10744722	550	18955	0.1338234213484429	1.0
	2658935	2657085		-	hscA	b2526	DnaK-like molecular chaperone specific for IscU	9	18	20	15106	22614	28271	0	11	24	23	15	35621	28581	23691	0	15	0.13411342188674674	1.0
	2249618	2248737		-	yeiE	b2157	putative DNA-binding transcriptional regulator	12	21	7	19441	25976	9924	0	20	22	19	11	32872	24471	17847	0	28	0.13417255540536085	1.0
	3927155	3928147		+	asnA	b3744	asparagine synthetase A	84	104	109	130827	125391	153174	3	137	74	93	71	108794	114969	108609	3	111	0.1349901882041185	1.0
135582	135582	134788	131527	-	speD	b0120	S-adenosylmethionine decarboxylase	417	433	356	643510	519300	497382	18	696	386	472	350	567272	578040	532152	20	703	0.13592995017200338	1.0
1333431			1333243	-	-	predicted RNA	antisense: topA	2144	2633	2322	3303235	3154069	3241507	464	17105	2428	2637	1895	3565983	3227612	2876578	496	17054	0.13611067510058597	1.0
	2907941	2906643		-	eno	b2779	enolase	52	40	54	81147	48788	75716	1	52	34	53	33	50119	65037	51003	1	42	0.13657287423399675	1.0
	88028	89032		+	cra	b0080	transcriptional repressor-activator for carbon metabolism	24	39	31	37705	47107	43737	1	42	30	38	44	44851	46735	67803	1	52	0.1371260371925905	1.0
	1369025	1369384		+	pspC	b1306	psp operon transcription co-activator	2	0	2	3564	741	4037	0	7	2	3	3	3910	4449	4937	0	12	0.13731631905762232	1.0
	2882637	2882155		-	casB	b2759	CRISP RNA (crRNA) containing Cascade antiviral complex protein	3	3	3	4897	4430	4722	0	9	0	2	3	1092	2702	4867	0	5	0.13770153337117624	1.0
3648294			3648377	+	agrB	b4713	-	1	1	0	1687	1367	1122	0	16	0	0	1	461	70	1596	0	8	0.1380802676883691	1.0
	434647	435117		+	ribE	b0415	riboflavin synthase beta chain	3	11	1	5277	14345	1527	0	14	8	9	5	12354	11644	8077	0	22	0.13815260381887357	1.0
	3091878	3092828		+	gshB	b2947	glutathione synthetase	24	35	28	38034	42146	39748	1	42	10	30	25	15428	37580	38093	0	31	0.13866196005623824	1.0
758997			758826	-	-	predicted RNA	antisense: sucA	2241	2627	2070	3451479	3147638	2889621	499	18389	2199	2395	1742	3230507	2931772	2645219	496	17068	0.13902947458065001	1.0
	1002889	1003431		+	ycbU	b0942	putative fimbriae protein	4	15	9	6307	18347	13161	0	23	9	17	11	14036	21627	17184	0	32	0.13916914361525953	1.0
	4240055	4239777		-	yjbT	b4620	putative periplasmic protein	19	18	19	30602	22199	27429	2	95	24	20	28	36150	25256	43536	3	125	0.13939403553692978	1.0
	4074669	4075454		+	yihW	b3884	DeoR family putative transcriptional regulator	13	17	15	21214	20831	21641	0	27	16	32	13	24060	40000	20812	1	35	0.13976970849581155	1.0
	2829813	2830778		+	srlQ	b2708	D-arabinose 5-phosphate isomerase	46	68	67	71526	81999	93617	2	85	47	49	45	69185	60848	69399	1	68	0.1398016841509961	1.0
	266553	266110		-	yafY	b0251	lipoprotein, inner membrane; overproduction stimulates degP expression; CP4-6 prophage	52	82	71	80610	98325	100132	5	209	81	90	59	119877	110293	90762	7	240	0.13980458388916592	1.0
	2862335	2863501		+	ygbK	b2737	FliA-regulated DUF1537 family protein	79	88	63	121863	106478	88762	2	90	98	89	65	144117	109663	99084	2	100	0.14040697926423898	1.0
	2672047	2673249		+	hcaD	b2542	phenylpropionate dioxygenase, ferredoxin reductase subunit	31	42	29	47793	51388	41730	1	39	35	56	33	51630	69543	51055	1	47	0.1404468855439016	1.0
3964630			3964752	+	-	predicted RNA	antisense: rhlB	1515	1666	1489	2334123	1995855	2078944	469	17368	1438	1743	1176	2112551	2133470	1785589	477	16345	0.14067732094296226	1.0
	1605051	1606073		+	lsrB	b1516	autoinducer 2-binding protein	11	14	17	17823	17224	24523	0	19	11	12	6	17537	14793	9944	0	13	0.14092041348285247	1.0
	2552352	2553221		+	amiA	b2435	N-acetylmuramoyl-l-alanine amidase I	9	15	6	14068	18157	8983	0	15	12	13	14	18049	16222	22461	0	21	0.14106153402683438	1.0
	2136098	2135655		-	wzb	b2061	colanic acid production protein-tyrosine-phosphatase; Wzc-P dephosphorylase	3	2	8	5485	2858	12228	0	15	2	3	3	3406	4060	5678	0	9	0.14137918380589562	1.0
	1725632	1724736		-	ydhF	b1647	putative oxidoreductase	8	20	14	13107	24486	19750	0	21	7	10	10	11219	12769	16495	0	15	0.14171704393769696	1.0
	1915534	1914836		-	proQ	b1831	RNA chaperone, putative ProP translation regulator	57	65	74	89107	78188	103723	3	129	48	65	46	70628	80077	70324	3	105	0.14180942293477616	1.0
	1109335	1110870		+	opgG	b1048	osmoregulated periplasmic glucan (OPG) biosynthesis periplasmic protein	29	41	30	45838	49646	42581	0	29	35	50	36	52100	61987	54849	1	36	0.14188416922200378	1.0
	1432411	1432986	1434569	+	tfaR	b1373	Rac prophage; putative tail fiber assembly protein	68	184	70	104767	220756	98315	6	245	108	183	117	159050	224768	178672	9	325	0.14231971255136638	1.0
	3343944	3344669		+	lptB	b3201	lipopolysaccharide export ABC transporter ATP-binding protein of the LptBFGC export complex	18	28	18	28690	34224	25786	1	40	22	24	34	33119	30399	51988	1	53	0.1429999620632568	1.0
	1265012	1266094		+	prfA	b1211	peptide chain release factor RF-1	15	15	20	23940	19137	27949	0	21	13	13	9	19467	17071	14759	0	15	0.14330158923250252	1.0
	1706919	1709141		+	rsxC	b1629	SoxR iron-sulfur cluster reduction factor component; putative membrane-associated NADH oxidoreductase of electron transport complex	29	29	31	44921	35089	43258	0	18	43	39	27	64421	47746	41468	0	23	0.1434550434476069	1.0
	3836953	3838137		+	setC	b3659	putative arabinose efflux transporter	19	21	25	29451	25649	34935	0	25	12	21	15	17751	26147	23333	0	18	0.14346816913505803	1.0
	1634885	1634310	1632729	-	tfaQ	b1546	Qin prophage; putative tail fiber assembly protein	67	180	67	104135	216176	93799	6	239	106	178	115	156045	218486	175619	9	318	0.1438991340071604	1.0
	57364	58179		+	djlA	b0055	membrane-anchored DnaK co-chaperone, DNA-binding protein	3	5	2	4836	6989	3657	0	6	4	2	10	6258	2476	15683	0	9	0.14425504370652897	1.0
	1218983	1219201		+	ymgF	b4520	inner membrane division septum protein	1	2	1	2223	3096	1502	0	10	2	4	1	3014	5114	2721	0	16	0.14427203375034575	1.0
	2127190	2126225		-	wcaG	b2052	bifunctional GDP-fucose synthetase: GDP-4-dehydro-6-deoxy-D-mannose epimerase/ GDP-4-dehydro-6-L-deoxygalactose reductase	16	26	22	24961	31420	31855	0	30	24	32	25	35715	40155	38965	1	39	0.14437956589106937	1.0
	4410553	4411251		+	yjfJ	b4182	PspA/IM30 family protein	7	8	10	12008	10439	14804	0	17	4	4	8	6420	6077	13032	0	12	0.14451893872946467	1.0
	3447438	3446899		-	rplE	b3308	50S ribosomal subunit protein L5	43	65	66	66404	77922	93377	3	146	78	75	58	114882	92628	89043	5	183	0.14455237327327936	1.0
	351215	352666		+	prpD	b0334	2-methylcitrate dehydratase	16	24	17	25333	29433	25084	0	18	30	29	15	44851	35910	23264	0	23	0.14568735194247978	1.0
	554437	553943		-	ppiB	b0525	peptidyl-prolyl cis-trans isomerase B (rotamase B)	10	14	16	16906	17524	22409	1	38	15	15	22	23394	18938	34098	1	51	0.1456874365664578	1.0
	1371909	1373201		+	ycjN	b1310	putative ABC superfamily sugar transporter periplasmic-binding protein	3	7	2	5995	8867	3244	0	4	0	5	3	0	6558	4928	0	2	0.14579504627578435	1.0
	2509426	2508461		-	glk	b2388	glucokinase	14	24	18	21612	28882	26034	0	26	17	37	18	25708	45313	28803	1	34	0.1459269691810426	1.0
	1323082	1323038		-	trpL	b1265	trp operon leader peptide	0	0	0	1531	0	371	0	14	0	0	0	196	955	0	0	8	0.14596225857325532	1.0
	4365356	4365018		-	cutA	b4137	divalent-cation tolerance protein, copper sensitivity	14	11	7	22252	14284	10899	1	46	14	15	16	20713	18408	25174	1	63	0.14602642858581596	1.0
	3980887	3982272		+	yifK	b3795	putative APC family amino acid transporter	31	33	27	48356	39546	38155	0	30	17	25	25	26058	31659	38939	0	23	0.14664773254348645	1.0
	4026527	4027228		+	fre	b3844	NAD(P)H-flavin reductase	4	13	7	6558	16026	10048	0	15	7	15	10	11287	18988	16006	0	21	0.14685835994069887	1.0
	3361176	3361940		+	gltF	b3214	periplasmic protein	10	14	10	16871	17694	14746	0	21	11	4	8	16581	4931	12604	0	14	0.14728014801444458	1.0
	4079297	4079509		+	yiiE	b3889	CopG family putative transcriptional regulator	1	4	1	2310	5138	2295	0	15	2	2	5	4286	3218	7763	0	23	0.14744713788739142	1.0
	1948632	1948180		-	nudB	b1865	dihydroneopterin triphosphate pyrophosphatase	3	9	6	5303	11337	9322	0	19	6	14	7	9246	17877	10956	0	28	0.14752464299446474	1.0
	1352634	1351828		-	sapF	b1290	antimicrobial peptide transport ABC system ATP-binding protein	23	29	26	35455	35211	36553	1	44	34	31	30	51366	39115	46580	1	56	0.1477658043842567	1.0
4171637			4171756	+	rrfB	b3971	5S ribosomal RNA of rrnB operon	2	6	6	3729	7914	8967	1	57	10	6	5	15309	7576	8147	2	86	0.14789776921460002	1.0
3648305	3647788	3647705	3645342	-	dinQ	b4613	UV-inducible membrane toxin, DinQ-AgrB type I toxin-antitoxin system	282	302	275	435352	362141	385038	126	4692	222	259	216	327057	317559	328838	112	3862	0.1479071343747331	1.0
	1563076	1562495		-	ddpX	b1488	D-ala-D-ala dipeptidase, Zn-dependent	10	7	6	16127	9221	9594	0	20	12	10	11	18374	13286	17463	0	28	0.1481305240106678	1.0
	686669	685929		-	gltJ	b0654	glutamate, aspartate ABC transporter permease subunit	4	13	12	6887	16333	17025	0	18	11	17	10	17332	21980	15989	0	24	0.14831103029918652	1.0
	2469131	2470462		+	gtrS	b2352	serotype-specific glucosyl transferase, CPS-53 (KpLE1) prophage	34	21	30	53521	25792	43200	0	30	22	23	20	33606	29147	31088	0	23	0.14953036702341913	1.0
3915026			3915184	+	-	predicted RNA	antisense: glmU	2221	2321	2402	3420946	2780828	3352803	539	20030	2082	2153	2033	3057803	2635988	3086941	531	18408	0.1496004984439308	1.0
	727036	724988		-	kdpB	b0697	potassium translocating ATPase, subunit B	8	25	13	12398	30005	18231	0	9	16	16	24	23907	20021	36819	0	13	0.14960704696718366	1.0
	190	255		+	thrL	b0001	thr operon leader peptide	1	7	4	2232	9126	6952	2	92	1	3	3	2740	3735	5181	1	58	0.14961712724398138	1.0
2518116			2518041	-	alaX	b2396	Ala tRNA	0	0	0	147	530	214	0	3	0	0	0	691	367	575	0	7	0.1500635418418328	1.0
940483			940343	-	-	predicted RNA	antisense: serS	1986	1999	1863	3059785	2395453	2599711	513	19042	1532	1819	1483	2250734	2226947	2251814	462	15908	0.15010681075436555	1.0
1141163	1144502	1144822	1144822	+	yceQ	b1085	uncharacterized protein	2255	2653	2034	3473905	3177950	2839443	267	9855	2011	2494	1698	2953901	3052479	2578532	260	8914	0.15014325300189316	1.0
	4108834	4109823		+	sbp	b3917	sulfate transporter subunit	38	72	53	58825	86518	74915	2	74	47	38	40	69535	47484	61610	1	60	0.15078394389984479	1.0
	3155218	3154262		-	yqhC	b3010	transcriptional activator of yqhD	70	78	81	109214	94405	113227	2	110	82	78	88	121653	95620	133653	3	122	0.15082867357180457	1.0
	2495292	2495050		-	yfdY	b2377	DUF2545 family putative inner membrane protein	4	7	7	6601	9432	9792	0	35	5	3	3	7428	4520	5155	0	23	0.15104699379807265	1.0
	956632	954872		-	ycaO	b0905	ribosomal protein S12 methylthiotransferase accessory factor	16	33	24	25402	39818	34159	0	18	21	34	35	31190	42539	54056	0	24	0.15111496380263006	1.0
	2882142	2881051		-	casC	b2758	CRISP RNA (crRNA) containing Cascade antiviral complex protein	36	32	33	56636	39478	46610	1	43	43	38	41	63447	47591	62247	1	52	0.15153647185382516	1.0
	4400672	4401952		+	hflX	b4173	GTPase, stimulated by 50S subunit binding	11	10	20	17130	13032	28618	0	15	16	23	16	24573	28701	25157	0	20	0.15222886694635776	1.0
	3461023	3461460		+	gspG	b3328	pseudopilin, cryptic, general secretion pathway	17	19	15	26769	23424	21451	1	54	11	15	10	17614	19136	15422	1	39	0.15273887553848864	1.0
1746971			1746445	-	-	predicted RNA	antisense: ydhR valV valW	10111	13349	11023	15572287	15989948	15382156	809	29692	11107	13025	11399	16311646	15942638	17301578	909	31344	0.15300260324318174	1.0
	1216748	1216996		+	ymgC	b1167	Blue light, low temperature and stress induced protein	0	0	0	0	639	0	0	0	0	0	0	0	0	976	0	1	0.15313993459579153	1.0
	1272507	1273202		+	chaC	b1218	cation transport regulator	44	78	60	68852	93895	84311	3	118	67	80	68	98454	98259	104570	4	144	0.15326400556977401	1.0
	3929603	3928152	3927141	-	viaA	b3745	stimulator of RavA ATPase activity; von Willebrand factor domain protein	6003	6393	6446	9245431	7657349	8994954	160	5945	8028	6237	7594	11790889	7634347	11526857	203	7105	0.15331207635820693	1.0
	3177280	3176858		-	yqiB	b3033	DUF1249 protein YqiB	44	60	36	68316	71954	51011	4	150	40	50	24	59289	61457	36470	3	123	0.15331406983200638	1.0
225521			225363	-	-	predicted RNA	antisense: ileV alaV	9520	7098	6674	14661593	8502164	9314028	1816	68087	7548	10182	6979	11085783	12462200	10593283	2096	71574	0.15356916036258728	1.0
2441071			2441225	+	-	predicted RNA	antisense: fabB	2253	1662	1813	3470297	1991425	2530154	457	17186	1847	1709	1235	2712713	2092472	1874511	416	14364	0.15372852992395653	1.0
	679508	680215		+	ybeU	b0648	DUF1266 family protein	6	9	6	10754	11392	8570	0	14	4	4	5	6292	6027	8531	0	9	0.1538968338656813	1.0
	2297024	2296362		-	ccmB	b2200	heme exporter subunit	3	5	1	4672	6152	2122	0	6	1	1	2	1801	2440	3750	0	4	0.15470222384166613	1.0
4470605			4470767	+	-	predicted RNA	antisense: ridA	2202	2433	2159	3391590	2914856	3013888	515	19059	1829	2347	1667	2686270	2872635	2531245	483	16544	0.1550501293960559	1.0
	2639283	2638663		-	yfgM	b2513	putative anti-RcsB factor	6	6	3	9473	7234	4533	0	11	2	4	2	4397	5751	3707	0	7	0.15518965023059725	1.0
195392			194874	-	-	predicted RNA	antisense: ispU	8666	8810	7688	13347681	10553518	10728577	600	22241	9163	9376	6864	13457428	11476179	10418789	659	22705	0.155502954153623	1.0
	1936314	1934839		-	zwf	b1852	glucose-6-phosphate 1-dehydrogenase	15	30	32	23758	36531	45611	0	23	24	23	11	35450	28539	16966	0	18	0.15582230442710118	1.0
3423787			3423668	-	rrfD	b3274	5S ribosomal RNA of rrnD operon	2	5	6	4213	6022	8397	1	51	7	6	5	11723	7569	8879	2	78	0.15604476147031418	1.0
	2934235	2935551		+	fucP	b2801	L-fucose transporter	23	25	22	35871	30488	31896	0	24	17	19	16	25683	24414	24677	0	18	0.15613002550934113	1.0
4037283			4037123	-	-	predicted RNA	antisense: ileT alaT	9617	7144	6712	14811420	8557867	9366344	1807	67775	7607	10235	7029	11172925	12527421	10668675	2083	71157	0.15621785280483405	1.0
3427010			3427170	+	-	predicted RNA	antisense: ileU alaU	9615	7142	6715	14808124	8555492	9370630	1807	67772	7609	10236	7028	11175691	12529055	10667951	2084	71165	0.15634583369505908	1.0
1331510			1330877	-	-	predicted RNA	antisense: topA	8934	10264	8510	13760088	12293929	11875699	540	19942	9292	9801	7746	13646413	11996413	11758173	570	19664	0.15649317897190793	1.0
	1368079	1368747		+	pspA	b1304	regulatory protein for phage-shock-protein operon	9	11	9	14768	13461	12707	0	20	6	4	8	9537	5447	13337	0	14	0.15655351626488115	1.0
	1413927	1413733		-	ralR	b1348	Rac prophage; restriction alleviation protein	0	1	0	0	1483	0	0	2	0	0	0	452	0	662	0	1	0.15660842466070715	1.0
	2082547	2081381		-	dacD	b2010	D-alanyl-D-alanine carboxypeptidase (penicillin-binding protein 6b)	16	32	21	26016	39206	30286	0	27	17	20	14	25683	25482	21353	0	20	0.15746684533043037	1.0
672088			672374	+	-	predicted RNA	antisense: leuS lptE	3988	4544	4119	6142152	5443228	5748716	545	20132	3668	4203	3357	5387875	5144916	5096659	527	18152	0.15756966786613136	1.0
	1120586	1119468		-	solA	b1059	N-methyltryptophan oxidase, FAD-binding	10	21	16	15625	25928	23474	0	19	23	21	16	34392	26501	24546	0	25	0.15767132102132403	1.0
	2964177	2963707		-	ppdA	b2826	putative prepilin peptidase-dependent protein	1	2	0	2785	2749	0	0	3	2	2	0	4277	3105	1352	0	6	0.15787194636159063	1.0
	2850647	2850997		+	hypA	b2726	protein involved in nickel insertion into hydrogenases 3	0	1	2	1142	1238	3806	0	5	2	0	3	4055	1004	4710	0	9	0.15834189850541677	1.0
	3113477	3113067		-	yghG	b2971	secretin (GspDbeta) OM localization lipoprotein pilotin	14	11	10	22927	13515	14920	1	41	16	20	13	23548	24761	20490	1	55	0.15867685940129356	1.0
2276299	2276300	2277889	2280530	+	yejF	b2180	microcin C transporter, ATP-binding subunit; ABC family	6881	9862	7335	10597265	11813413	10235785	187	6844	8419	9782	6639	12365249	11972486	10077887	210	7215	0.15880637672357503	1.0
4416952	4416952	4417701	4417999	+	yjfP	b4190	acyl CoA esterase	210	282	253	323706	338287	353934	12	451	175	229	202	257778	280509	307964	10	376	0.15894365281404918	1.0
755338			754971	-	-	predicted RNA	antisense: sdhC	10960	11342	10099	16880247	13585177	14092444	1089	40360	11326	13068	8277	16633452	15994722	12563712	1197	40934	0.15897324096689577	1.0
672492			672668	+	-	predicted RNA	antisense: leuS	2130	2453	2250	3281752	2938934	3140500	477	17629	1981	2050	1773	2910664	2509182	2691748	442	15276	0.15999587832506731	1.0
	2777453	2777782		+	ypjF	b2646	CP4-57 prophage; toxin of the YpjF-YfjZ toxin-antitoxin system	10	8	13	15928	10140	18916	1	45	17	16	10	25563	19808	15195	1	61	0.16005656371344681	1.0
	4504058	4505275		+	yjhB	b4279	putative transporter	6	3	2	9871	4103	3600	0	4	3	2	2	5584	2603	3122	0	3	0.16014955497308328	1.0
	3074689	3073976		-	yggC	b2928	putative PanK family P-loop kinase	47	54	41	73810	65502	58137	2	92	52	70	58	76673	86890	89340	3	118	0.16043994926678912	1.0
	613942	614160		+	ybdZ	b4511	stimulator of EntF adenylation activity, MbtH-like	2	2	3	4351	2592	4615	0	17	6	3	3	8845	4230	4658	0	26	0.16098201924759245	1.0
	3175396	3173504		-	parE	b3030	DNA topoisomerase IV, subunit B	71	103	82	110477	124179	114639	1	61	93	111	100	137559	136165	152119	2	74	0.16127060846530372	1.0
	3430023	3429766	3429238	-	yrdB	b3280	DUF1488 family protein	210	228	233	324078	273730	325505	32	1192	162	233	156	238131	286232	237290	28	984	0.16147026722571076	1.0
	3448568	3448314		-	rpsQ	b3311	30S ribosomal subunit protein S17	27	24	28	42896	29481	39146	3	145	30	40	30	44339	49621	46912	5	184	0.1619432155633658	1.0
	598714	601857		+	cusA	b0575	copper/silver efflux system, membrane component	56	55	49	86745	66122	68408	0	23	38	61	32	56565	74835	49162	0	19	0.1621416366096609	1.0
	1517389	1517562		+	ydcX	b1445	DUF2566 family protein	14	16	9	22858	19382	13145	2	106	9	9	9	13473	11750	14349	2	75	0.16249983267335763	1.0
225381			225457	+	ileV	b0202	Ile tRNA	0	0	2	1245	524	3071	0	20	1	2	1	1767	3537	2337	0	33	0.1625293319364581	1.0
	2610164	2610709		+	hyfH	b2488	hydrogenase 4, Fe-S subunit	12	18	11	19666	22015	16538	0	35	21	18	15	30959	22094	24171	1	47	0.16279720438212178	1.0
	152231	151626		-	yadL	b0137	putative fimbrial-like adhesin protein	9	16	3	14916	19368	5053	0	21	13	9	14	19407	11453	22758	0	29	0.16420854868146856	1.0
	3091134	3091865		+	rsmE	b2946	16S rRNA m(3)U1498 methyltransferase, SAM-dependent	1	7	4	2820	8595	6952	0	8	3	8	7	5532	10590	11514	0	12	0.16429632078937317	1.0
1269858			1269923	+	rdlB	b4422	-	6	6	6	10616	8112	8975	3	139	10	11	6	15172	14474	10040	5	200	0.16429888748411672	1.0
	4223628	4222804		-	iclR	b4018	transcriptional repressor	35	36	37	54230	43949	52671	1	60	20	39	27	29807	48807	42280	1	48	0.16454798035111337	1.0
	3333119	3332862		-	rpmA	b3185	50S ribosomal subunit protein L27	9	12	11	14916	15149	16158	1	59	9	9	4	13977	11262	7135	1	41	0.16456654914036367	1.0
	1123273	1122713		-	yceB	b1063	lipoprotein, DUF1439 family	11	13	13	18446	16183	18512	0	31	8	12	6	11927	15755	10092	0	22	0.16465337940189226	1.0
	1004768	1005778		+	pyrD	b0945	dihydro-orotate oxidase, FMN-linked	21	18	19	32583	22335	26669	0	26	8	19	16	12269	23650	25104	0	20	0.1652017767595549	1.0
	3196753	3195320		-	hldE	b3052	fused heptose 7-phosphate kinase/heptose 1-phosphate adenyltransferase	30	35	41	46331	42337	57394	0	33	36	45	44	53816	55267	66826	1	40	0.16525922183575043	1.0
	4269012	4268809		-	yjbS	b4621	uncharacterized protein	4	1	2	6506	1265	4054	0	19	1	1	2	2681	1379	3140	0	11	0.16530199605171547	1.0
	3966417	3967676		+	rho	b3783	transcription termination factor	44	62	40	68177	74819	56461	1	52	63	70	49	93656	86466	74685	1	67	0.16550484549817981	1.0
	3006262	3007452		+	ygeW	b2870	putative carbamoyltransferase	52	49	39	80472	59255	55775	1	54	36	44	35	53261	54403	53428	1	45	0.16588064712547287	1.0
952048			952198	+	-	predicted RNA	antisense: pflB	2057	2353	2261	3169155	2818429	3156072	546	20184	1796	2029	1697	2638584	2483586	2576116	493	16994	0.16596728479142533	1.0
	515919	516596		+	fetA	b0490	iron exporter, ATP-binding subunit, ABC transporter FetAB subunit; peroxide resistance protein	7	12	11	11576	15230	15737	0	20	13	18	10	19637	22193	15430	0	28	0.16636475634753095	1.0
	1155762	1156766		+	holB	b1099	DNA polymerase III, delta prime subunit	34	37	28	52708	45494	39897	1	45	28	31	18	41248	38945	28288	1	35	0.1663695554984667	1.0
	850097	849210		-	rhtA	b0813	threonine and homoserine efflux system	17	24	11	27184	29787	15696	0	27	20	29	18	29738	36519	27625	1	35	0.16644915006385264	1.0
	2578666	2579616		+	talA	b2464	transaldolase A	20	27	19	31458	32782	27792	0	32	20	15	13	29875	19016	21161	0	24	0.16659587944613213	1.0
	4326734	4326399		-	yjdM	b4108	zinc-ribbon family protein	4	7	6	6982	9194	9099	0	25	5	5	2	7411	6501	3061	0	16	0.1666542124593088	1.0
	1612325	1611966	1611921	-	yneG	b1523	DUF4186 family protein	390	456	409	601531	547270	570828	43	1592	399	543	376	586005	665596	571641	49	1688	0.16675461045716283	1.0
	1478226	1479122		+	ynbB	b1409	putative CDP-diglyceride synthase	1	1	1	2301	1810	2411	0	2	0	1	0	981	1549	1238	0	1	0.16714211196565304	1.0
	2552138	2551713		-	ypeA	b2434	putative acyl-CoA transferase	2	3	1	3988	4688	1395	0	7	1	3	5	2365	4697	8339	0	12	0.1676793944519207	1.0
	2868753	2867614		-	nlpD	b2742	activator of AmiC murein hydrolase activity, lipoprotein	32	46	31	49775	55355	43646	1	43	31	49	46	46900	60735	71292	1	52	0.1680694203909828	1.0
	1312890	1312351		-	yciB	b1254	IspA family inner membrane protein	23	37	28	36866	44657	39691	2	74	26	24	16	38627	30576	24598	1	57	0.168147613835364	1.0
	1227714	1228007		+	ycgL	b1179	UPF0745 family protein	0	2	0	795	3511	0	0	4	1	1	1	2612	1804	2363	0	7	0.16830727590590036	1.0
	4011076	4011975		+	yigM	b3827	putative inner membrane EamA-like transporter	83	109	91	129139	130679	127470	3	143	60	103	72	89327	126954	109848	3	120	0.16856459763155499	1.0
1735516			1735372	-	-	predicted RNA	antisense: sodB	2103	1914	2219	3239366	2292547	3096755	531	19836	1690	1886	1510	2482556	2308517	2292245	473	16283	0.16870184583693304	1.0
	3379997	3378870		-	yhcM	b3232	putative AFG1-like family P-loop ATPase	33	40	28	52232	49020	39129	1	41	27	52	42	41077	64287	63895	1	50	0.16889045241419276	1.0
780843			780918	+	lysW	b0745	Lys tRNA	1	2	2	2794	3314	3137	1	40	1	5	3	2646	6416	5207	1	62	0.16892359746107954	1.0
	670572	669931		-	nadD	b0639	nicotinic acid mononucleotide adenylyltransferase, NAD(P)-dependent	34	46	35	53858	55771	48848	2	82	46	52	40	68152	64407	60720	2	100	0.16914578853226708	1.0
	2212962	2212243		-	yehT	b2125	putative response regulator in two-component system withYehU	9	23	12	14812	28079	17595	0	28	14	25	17	21738	31390	26448	1	36	0.16937830781384516	1.0
	2775919	2776377		+	yfjX	b2643	CP4-57 prophage; putative antirestriction protein	32	28	16	50605	34136	22359	2	77	40	30	25	59272	37764	38293	2	98	0.16948967692197284	1.0
	4609414	4611003		+	prfC	b4375	peptide chain release factor RF-3	32	42	39	50536	50415	54743	0	32	40	54	41	59212	66968	62482	1	39	0.16963073098855055	1.0
	1821619	1821299		-	chbB	b1738	N,N'-diacetylchitobiose-specific enzyme IIB component of PTS	0	0	0	0	483	0	0	0	0	0	0	734	0	0	0	0	0.16991051177600033	1.0
1307155	1307150	1306821	1299497	-	yciU	b1248	UPF0263 family protein	1185	1423	1150	1825315	1704627	1605350	140	5187	1271	1411	1157	1866675	1727626	1757274	156	5405	0.1700627113025538	1.0
	4516677	4514353		-	fecA	b4291	ferric citrate outer membrane transporter	10	23	14	15729	28603	20873	0	9	17	27	16	25956	33286	25750	0	12	0.17065008910449056	1.0
	4449962	4450918		+	ytfQ	b4227	galactofuranose binding proteint: periplasmic-binding component of ABC superfamily	10	10	5	16335	11991	7142	0	12	7	16	12	10553	20000	18361	0	17	0.1707791246236125	1.0
111044	111044	111433	113301	+	mutT	b0099	nucleoside triphosphate pyrophosphohydrolase, marked preference for dGTP	165	188	200	254646	225268	280232	17	649	122	145	157	179431	178103	239105	14	509	0.17113884573023572	1.0
	1967037	1966393		-	cheZ	b1881	chemotaxis regulator, protein phosphatase for CheY	0	3	0	1341	3593	255	0	2	0	0	1	0	0	2965	0	1	0.17124367908853436	1.0
	572921	573091		+	ninE	b0548	DLP12 prophage; conserved protein	0	3	1	1522	3885	1651	0	13	1	1	0	1878	1605	575	0	7	0.1716096259641368	1.0
23135			22829	-	-	predicted RNA	antisense: ileS	3834	4596	4184	5905917	5505444	5839715	508	18730	3763	4109	3321	5526579	5029847	5041599	491	16935	0.17192022449927077	1.0
	1351760	1351407		-	ycjD	b1289	DUF559 family endonuclease-related protein	4	3	1	6419	4620	2600	0	12	1	3	1	1750	4740	2206	0	8	0.17203729732360581	1.0
	969389	970621		+	ycaQ	b0916	DUF1006 family protein with C-terminal wHTH domain	11	10	12	18229	12501	17265	0	12	7	9	6	11577	12083	10170	0	9	0.17391896793681505	1.0
	4112967	4113266		+	yiiS	b3922	UPF0381 family protein	6	9	15	10122	11616	21402	1	47	20	12	8	29918	15047	12726	1	64	0.17454932194688316	1.0
	2448440	2447508		-	prmB	b2330	N5-glutamine methyltransferase	55	67	48	86087	80495	68293	2	83	64	37	34	94791	45985	52494	1	69	0.17527509954388582	1.0
	2249717	2250766		+	yeiH	b2158	UPF0324 family inner membrane protein	26	48	40	41512	57942	55924	1	49	47	52	35	69108	64478	53968	1	59	0.1754264787407618	1.0
	3884493	3884852		+	rnpA	b3704	protein C5 component of RNase P	3	4	9	4897	5913	13582	0	22	9	11	4	13814	14517	6926	0	32	0.17567880136163555	1.0
	2483755	2484369		+	evgA	b2369	response regulator in two-component regulatory system with EvgS	13	11	7	20808	13747	10403	0	24	17	12	12	25239	15330	19330	0	32	0.1757116713556045	1.0
	2704063	2703383		-	rnc	b2567	RNase III	2	5	8	4161	6682	11840	0	11	4	3	2	5993	4874	4387	0	7	0.17610812384769653	1.0
	2433926	2433012		-	accD	b2316	acetyl-CoA carboxylase, beta (carboxyltransferase) subunit	6	5	7	10494	6465	10403	0	9	7	9	10	11381	12118	15396	0	14	0.17628787771542348	1.0
	1799749	1799393		-	rplT	b1716	50S ribosomal subunit protein L20	14	22	17	22477	27160	23771	1	68	20	26	20	30455	32939	30861	2	88	0.1763007065273175	1.0
	4321247	4320663		-	phnH	b4100	ribophosphonate triphosphate synthase subunit	23	18	31	36623	22635	44356	1	59	17	23	16	26084	28560	25488	1	45	0.17645732959319158	1.0
1509064	1509064	1508834	1506169	-	yncJ	b1436	uncharacterized protein	57	70	78	87982	84197	110040	11	407	43	63	62	63217	77474	95394	9	340	0.17678674294088317	1.0
	785317	784937		-	ybgS	b0753	putative periplasmic protein	30	41	41	46885	49435	58302	3	135	51	42	38	76323	51963	57920	4	162	0.1775400717416334	1.0
3556849	3556849	3555833	3553041	-	rtcA	b4475	RNA 3'-terminal phosphate cyclase	282	453	398	435057	543282	556072	13	502	226	380	357	332197	465779	542480	12	439	0.17762158715091586	1.0
	4486218	4487318		+	lptF	b4261	lipopolysaccharide export ABC permease of the LptBFGC export complex	32	50	41	50181	60228	58401	1	51	31	30	39	45739	37042	59202	1	42	0.17811680967505267	1.0
	2263495	2262365		-	fruB	b2169	fused fructose-specific PTS enzymes: IIA component/HPr component	15	22	13	24130	27092	18602	0	20	25	24	14	37192	30442	22304	0	26	0.17830670126489492	1.0
	2038152	2036794		-	yedV	b1968	putative sensory kinase in two-component regulatory system with YedW	7	11	8	10970	13189	12112	0	8	13	13	8	19731	16632	13215	0	12	0.17842570526907126	1.0
	113444	114487		+	guaC	b0104	GMP reductase	77	87	77	119025	104811	107596	2	105	66	83	61	97677	101641	93501	2	93	0.17850462983926718	1.0
	3126522	3125470		-	glcE	b4468	glycolate oxidase FAD binding subunit	10	9	15	16222	11841	22318	0	15	8	8	8	12064	10293	13520	0	11	0.17869909142569426	1.0
4175673			4175747	+	glyT	b3978	Gly tRNA	1	1	3	2041	1987	4945	1	39	1	1	1	1895	1605	1762	0	23	0.17875350866077672	1.0
	3211107	3212852		+	dnaG	b3066	DNA primase	20	29	15	32176	35756	21691	0	17	24	31	26	36475	38160	39523	0	21	0.17907495614304983	1.0
	3139964	3139716		-	hybG	b2990	hydrogenase 2 accessory protein	35	33	41	55277	40404	57352	5	204	32	30	26	47378	37361	39628	4	166	0.17920563770989492	1.0
	3580805	3579768		-	yhhX	b3440	putative oxidoreductase	25	19	18	39150	23438	26166	0	28	21	40	20	31787	49451	31847	1	36	0.17930619849001245	1.0
	3679187	3678420		-	yhjH	b3525	cyclic-di-GMP phosphodiesterase, FlhDC-regulated	9	16	7	14258	19906	10915	0	19	11	14	16	16342	17764	25785	0	25	0.17962455173033026	1.0
	1794109	1793558		-	btuE	b1710	glutathione peroxidase	7	7	5	11636	8561	7951	0	16	8	13	7	12320	16137	11304	0	24	0.17965085622982868	1.0
2807391			2806622	-	-	predicted RNA	antisense: proX proW	9054	11009	9145	13944445	13186627	12761778	469	17269	10071	12008	7465	14790898	14697453	11331202	517	17670	0.1797397613602671	1.0
	3371036	3370347		-	nanE	b3223	putative N-acetylmannosamine-6-P epimerase	6	2	5	9534	3259	7323	0	9	3	5	1	4935	6133	2267	0	6	0.17980242104798103	1.0
	3234144	3233728		-	higA	b3082	antitoxinof the HigB-HigA toxin-antitoxin system	10	7	8	16637	8711	11790	0	29	8	9	0	12909	12118	1177	0	20	0.17996070181051393	1.0
	2663442	2664245		+	suhB	b2533	inositol monophosphatase	10	14	16	15919	16850	23226	0	23	9	30	14	14190	37573	21938	0	30	0.18018679132671797	1.0
3815768	3815768	3815127	3812713	-	pyrE	b3642	orotate phosphoribosyltransferase	313	389	386	482410	465952	539096	20	772	285	323	307	419851	395861	466765	19	665	0.1803021977977805	1.0
4374234	4374234	4373365	4372711	-	yjeJ	b4145	uncharacterized protein	233	213	264	359880	255553	369688	10	377	182	203	204	268007	248666	310066	9	316	0.18039714169256263	1.0
761887			761723	-	-	predicted RNA	antisense: sucB	2244	2394	2245	3457086	2867966	3133812	516	19108	2027	2060	1683	2977245	2522433	2555286	471	16272	0.18096646919879908	1.0
	3281976	3283130		+	agaS	b3136	tagatose-6-phosphate ketose/aldose isomerase	62	64	69	96945	76684	97159	2	78	53	57	50	78159	70902	76421	1	65	0.18121793784476325	1.0
204491			204382	-	-	predicted RNA	antisense: lpxB	1306	1519	1505	2011766	1819987	2100833	486	17977	1428	1502	1160	2097327	1838804	1761505	501	17265	0.18136286497197915	1.0
	2501130	2501987		+	ypdC	b2382	putative DNA-binding protein	13	18	17	20098	21886	24547	0	25	19	22	19	28816	27414	29745	0	33	0.18166603905863554	1.0
	3979956	3980696		+	wecG	b3794	UDP-N-acetyl-D-mannosaminuronic acid transferase	22	22	32	34530	26609	45338	1	47	30	38	27	45039	47392	41355	1	60	0.1819212379457279	1.0
	2085525	2084467		-	yeeE	b2013	UPF0394 family inner membrane protein	23	41	30	35646	50020	42878	1	40	37	38	35	54397	47484	54378	1	49	0.1820633498082025	1.0
	2222185	2223900		+	dld	b2133	D-lactate dehydrogenase, FAD-binding, NADH independent	88	88	105	135750	106158	147469	2	75	77	83	73	114523	102306	111418	1	63	0.18225682042069205	1.0
1932756	1932756	1932115	1930871	-	eda	b1850	multifunctional 2-keto-3-deoxygluconate 6-phosphate aldolase and 2-keto-4-hydroxyglutarate aldolase and oxaloacetate decarboxylase	367	332	439	566014	398475	612723	21	818	331	346	330	486202	424534	501334	21	733	0.18313511556610976	1.0
	4490063	4488561		-	yjgR	b4263	DUF853 family protein with NTPase fold	36	84	64	55658	101293	90388	1	54	44	54	47	65189	67088	72165	1	45	0.18331159974635045	1.0
	2571751	2570348		-	eutE	b2455	aldehyde oxidoreductase, ethanolamine utilization protein	9	8	3	15201	9867	5036	0	7	4	6	4	6446	8178	6341	0	4	0.1838761230252357	1.0
	893784	894896		+	potF	b0854	putrescine transporter subunit: periplasmic-binding component of ABC superfamily	4	6	3	6324	8112	4359	0	5	2	3	3	3210	3735	5469	0	3	0.18393338972570347	1.0
	4094272	4093448		-	rhaD	b3902	rhamnulose-1-phosphate aldolase	34	38	29	52491	45841	40871	1	56	49	41	28	73087	50838	42943	1	67	0.18395270156388624	1.0
	3933778	3935283		+	rbsA	b3749	fused D-ribose transporter subunits of ABC superfamily: ATP-binding components	38	49	35	59897	59480	50094	1	37	30	39	33	44424	48015	50540	0	31	0.1841654527126589	1.0
4543679			4543012	-	-	predicted RNA	antisense: fimA	11252	10297	8362	17329382	12334435	11669482	555	20625	8668	13540	9403	12730532	16572019	14271999	638	21743	0.1854492810339494	1.0
	3501268	3502290		+	frlB	b3371	fructoselysine-6-P-deglycase	29	31	28	44990	37382	40120	1	39	45	34	27	67170	41860	41224	1	48	0.18579615514222753	1.0
	2876581	2877618		+	iap	b2753	aminopeptidase in alkaline phosphatase isozyme conversion	37	39	45	58427	47413	63619	1	54	42	38	22	62218	47357	33469	1	45	0.18595488623074122	1.0
	1130128	1129835		-	flgM	b1071	anti-sigma factor for FliA (sigma 28)	38	58	52	59292	69872	73767	6	230	32	44	43	47891	54531	65579	5	190	0.18608423570052526	1.0
	2154016	2155263		+	mdtA	b2074	multidrug efflux system, subunit A	6	11	7	9491	13685	10279	0	8	6	6	4	9443	7612	6577	0	6	0.18635372174467774	1.0
	2292410	2291358		-	ccmH	b2194	heme lyase, CcmH subunit	58	66	74	90647	79760	104508	2	87	73	70	79	107812	85956	120874	2	99	0.18651002819179993	1.0
	1542590	1538850		-	narZ	b1468	nitrate reductase 2 (NRZ), alpha subunit	34	47	42	53694	56900	59970	0	15	35	38	29	51810	47364	44923	0	12	0.1865366749715612	1.0
	3750086	3750781		+	sgbE	b3583	L-ribulose-5-phosphate 4-epimerase	31	26	27	47880	31611	37924	1	56	15	29	21	22984	36016	32658	1	43	0.18727687722283473	1.0
	1301182	1302813		+	oppA	b1243	oligopeptide transporter subunit	27	43	40	42593	51939	55866	0	30	39	55	35	57539	67994	53794	1	36	0.18758723713638928	1.0
	1351039	1350251		-	fabI	b1288	enoyl-[acyl-carrier-protein] reductase, NADH-dependent	19	14	26	29797	17068	37057	0	35	30	25	20	44082	31475	30992	1	45	0.18830879753407367	1.0
3829612			3829495	-	-	predicted RNA	antisense: xanP	1435	1500	1516	2210529	1796957	2116571	466	17299	1386	1470	1281	2036057	1799985	1945664	473	16332	0.1888168193159167	1.0
	3973608	3974489		+	rffH	b3789	glucose-1-phosphate thymidylyltransferase	8	14	17	13315	17360	23755	0	20	16	23	11	24564	28984	17768	0	26	0.1894900286544292	1.0
	1070955	1070365		-	rutE	b1008	putative malonic semialdehyde reductase	22	22	18	35135	26976	25439	1	49	13	18	16	20491	22207	24520	1	37	0.1898216771933567	1.0
	3655902	3655255		-	yhiD	b3508	putative Mg(2+) transport ATPase, inner membrane protein	7	6	6	11420	7683	8826	0	14	12	10	4	18323	13328	7536	0	20	0.19003550068390743	1.0
	2270726	2272282		+	rtn	b2176	resistance protein for phages lambda and N4, putative membrane-anchored cyclic-di-GMP phosphodiesterase	10	6	11	15608	7295	15490	0	8	12	16	8	18135	20297	13189	0	11	0.19006479099895207	1.0
	2326109	2327293		+	atoB	b2224	acetyl-CoA acetyltransferase	13	27	16	21526	32911	22913	0	21	8	17	16	12645	21422	24293	0	16	0.19030241769863085	1.0
1202084	1202084	1201776	1201489	-	ymfJ	b1144	e14 prophage; uncharacterized protein	98	119	91	151687	142895	127743	12	455	65	101	81	96379	123876	123412	10	370	0.19033106075406372	1.0
	3792551	3791355		-	kbl	b3617	glycine C-acetyltransferase	7	15	11	11931	18429	15366	0	12	10	17	14	16086	21789	22418	0	16	0.1903983677338051	1.0
	4284902	4283253		-	actP	b4067	acetate transporter	41	43	31	63341	52130	44257	0	32	32	39	23	48155	48383	36270	0	26	0.19041369627811566	1.0
	1780401	1781339		+	ydiR	b1698	putative electron transfer flavoprotein, FAD-binding subunit	20	18	11	31060	21845	16423	0	24	13	14	8	20261	17891	13494	0	18	0.19045561317526594	1.0
	4275471	4277057		+	yjcC	b4061	putative membrane-anchored cyclic-di-GMP phosphodiesterase	44	122	68	68973	146957	95144	1	65	52	81	59	76511	99419	89881	1	55	0.19045791171535742	1.0
	2295586	2295377		-	ccmD	b2198	cytochrome c biogenesis protein	1	1	2	1713	1211	3319	0	9	1	0	0	2407	63	1229	0	5	0.19053084305202403	1.0
1735880			1735731	-	-	predicted RNA	antisense: sodB	2334	2005	2187	3595431	2402266	3052580	538	20111	1926	1858	1518	2829499	2274849	2304876	476	16464	0.19064266368317725	1.0
	3673362	3674375		+	yhjD	b3522	inner membrane putative BrbK family alternate lipid exporter	50	72	43	77383	87280	60606	2	74	35	54	44	51579	66926	68047	1	61	0.19064811526074232	1.0
2947387			2947463	+	metZ	b2814	Met tRNA	6	12	6	10218	15149	9016	4	148	2	9	6	3056	11404	9979	3	105	0.19065885730990312	1.0
	89634	90092		+	mraZ	b0081	RsmH methytransferase inhibitor	3	7	4	5667	8411	6770	0	15	6	8	6	9742	10944	9656	0	22	0.19076737960172585	1.0
	4022218	4022733		+	tatB	b3838	TatABCE protein translocation system subunit	6	9	10	9716	11467	14350	0	22	4	6	7	5917	8312	11017	0	16	0.19084484260904905	1.0
	706093	707757		+	glnS	b0680	glutamyl-tRNA synthetase	33	34	32	52171	41493	45454	0	27	38	43	37	56967	52812	56542	0	33	0.19086483371889768	1.0
	379571	378462		-	frmA	b0356	alcohol dehydrogenase class III/glutathione-dependent formaldehyde dehydrogenase	33	62	40	51981	74812	56320	1	54	25	42	42	37534	52196	64096	1	46	0.19102970874757993	1.0
1799385			1802714	+	-	predicted RNA	antisense: infC thrS rplT rpmI	279489	277633	247631	430430403	332540533	345551771	2991	110963	239587	283645	199639	351852766	347157813	303011182	2927	100302	0.19109214869999092	1.0
4213040			4213159	+	rrfE	b4010	5S ribosomal RNA of rrnE operon	2	6	6	4031	7914	9297	1	59	11	6	4	16214	7576	7100	2	85	0.19114927856925323	1.0
	4474053	4473340		-	bdcA	b4249	c-di-GMP-binding biofilm dispersal mediator protein	48	82	58	74770	98373	81438	3	118	55	58	38	81318	71850	58435	2	98	0.19282558489140633	1.0
	2219481	2218564		-	osmF	b2131	putative ABC superfamily transporter periplasmic-binding protein	3	3	4	5649	3695	6432	0	5	5	4	6	7812	5758	10232	0	8	0.1930751494994618	1.0
	647509	646631		-	citG	b0613	2-(5''-triphosphoribosyl)-3'-dephosphocoenzyme-A synthase	25	30	34	39730	36770	47948	1	47	35	38	34	52663	47095	51936	1	57	0.19316185282352805	1.0
	1490902	1491432		+	cybB	b1418	cytochrome b561	20	50	33	31441	61031	46395	2	87	38	44	35	56506	54750	54614	3	104	0.19349558014007684	1.0
	1330668	1330417		-	yciN	b1273	DUF2498 protein YciN	50	60	51	78162	72988	71744	8	294	48	39	42	71166	48744	64898	7	244	0.19410723625593693	1.0
	2911339	2911091		-	mazE	b2783	antitoxin of the ChpA-ChpR toxin-antitoxin system	19	33	24	30048	39601	34737	3	139	12	26	20	18510	32578	30443	3	109	0.19412244994228434	1.0
	878035	876710		-	rimO	b0835	ribosomal protein S12 methylthiotransferase; radical SAM superfamily	188	165	203	290119	198373	283964	5	194	114	167	160	167477	205192	243850	4	154	0.194174675129734	1.0
	1317222	1316416		-	trpA	b1260	tryptophan synthase, alpha subunit	16	22	18	24952	26731	25299	0	31	16	14	10	24598	17835	15753	0	24	0.1942043430353301	1.0
3982606			3982692	+	leuT	b3798	Leu tRNA	2	2	2	4239	3259	3220	1	41	2	4	3	4337	6034	5530	1	60	0.19483583636439675	1.0
	4615543	4614680		-	yjjW	b4379	putative pyruvate formate lyase activating enzyme	31	32	36	48321	38886	51077	1	53	31	28	18	46926	34934	28550	1	42	0.19485419698532688	1.0
3318289			3318213	-	metY	b3171	Met tRNA	1	1	0	2526	1449	1362	0	23	1	0	0	2117	0	1038	0	13	0.19497257577982074	1.0
2098301	2098301	2097321		-	wzzB	b2027	regulator of length of O-antigen component of lipopolysaccharide chains	182	213	246	281752	255546	344306	8	299	168	201	154	248053	247145	235083	7	248	0.1951814801819357	1.0
	2800146	2800475		+	ygaM	b2672	DUF883 family protein, putative membrane-anchored ribosome-binding protein	50	72	38	77902	86423	53125	6	219	41	50	37	60484	62398	57519	5	182	0.19563692312350558	1.0
3611733	3611733	3610516	3609130	-	yhhS	b3473	putative arabinose efflux transporter	338	493	403	521906	590690	562761	12	458	358	409	337	525759	501506	512421	12	421	0.19597246132139384	1.0
	4520324	4519338		-	yjhU	b4295	putative DNA-binding transcriptional regulator; KpLE2 phage-like element	37	52	37	57553	63263	52679	1	58	35	33	35	51758	40707	54596	1	49	0.19606588652024323	1.0
	4118515	4118760		+	zapB	b3928	FtsZ stabilizer; septal ring assembly factor, stimulates cell division	46	52	56	70911	62835	78449	7	287	38	44	43	56548	54007	65579	6	238	0.1964540134472816	1.0
	1737844	1738869		+	purR	b1658	transcriptional repressor, hypoxanthine-binding	68	91	88	105649	109745	123251	2	110	64	81	70	94407	100091	106350	2	97	0.1964816071140674	1.0
	4306597	4304612		-	yjcS	b4083	metallo-beta-lactamase superfamily protein	27	20	21	42524	24778	29427	0	16	24	33	28	36654	41216	43736	0	20	0.19648670756839667	1.0
	450641	448650		-	cyoB	b0431	cytochrome o ubiquinol oxidase subunit I	36	49	58	56229	59854	82321	0	33	60	64	54	88422	78677	82885	1	41	0.1966623194161096	1.0
	255716	254259		-	pepD	b0237	aminoacyl-histidine dipeptidase (peptidase D)	43	39	41	67589	47155	58112	1	39	37	34	32	54465	42016	50078	0	33	0.19666287639033475	1.0
	4453583	4454578		+	yjfF	b4231	inner membrane putative ABC superfamily sugar transporter permease	69	87	89	107336	104573	124737	3	112	63	81	70	92913	99830	106481	2	100	0.19677299121114414	1.0
	4479730	4480926		+	yjgN	b4257	DUF898 family inner membrane protein	50	53	70	78274	64012	98315	1	67	38	33	68	56087	40565	103654	1	55	0.19754309298653877	1.0
	415753	412607		-	sbcC	b0397	exonuclease, dsDNA, ATP-dependent	46	73	55	72175	88185	77260	0	25	72	73	62	105959	90527	95167	0	30	0.1975670089527169	1.0
	1551338	1551991		+	fdnI	b1476	formate dehydrogenase-N, cytochrome B556 (gamma) subunit, nitrate-inducible	28	37	42	44030	45202	59474	2	75	33	41	50	48915	50703	76823	2	89	0.19758294326037898	1.0
	812270	812947		+	bioD	b0778	dethiobiotin synthetase	8	16	13	12701	19198	18619	0	24	9	21	16	14532	25942	25558	0	32	0.1978547740359081	1.0
	645003	644197		-	rna	b0611	ribonuclease I	79	109	79	122979	131523	110709	4	150	59	98	72	86782	120608	110214	3	131	0.1981568940975489	1.0
	1809233	1808697		-	yniB	b1726	putative inner membrane protein	11	13	10	18428	16755	14218	0	30	12	8	4	18792	10003	6786	0	22	0.19844490775257578	1.0
	4235906	4236148		+	yjbE	b4026	extracellular polysaccharide production threonine-rich protein	3	2	3	5684	2865	4400	0	17	3	7	2	5771	9147	4527	0	26	0.19880919253691626	1.0
	2795674	2796336		+	csiR	b2664	transcriptional repressor of csiD	61	70	68	94436	84007	95400	3	137	55	72	39	81702	89303	59342	3	115	0.19888502815252135	1.0
	2299578	2298715		-	napH	b2204	ferredoxin-type protein essential for electron transfer from ubiquinol to periplasmic nitrate reductase (NapAB)	0	0	1	1003	843	2122	0	1	0	0	3	213	827	4980	0	2	0.19894526887177785	1.0
	1182829	1181783		-	potD	b1123	polyamine transporter subunit	15	14	14	23689	17013	20650	0	19	17	20	19	25093	24640	29501	0	25	0.19940646563359943	1.0
	2702469	2701741		-	recO	b2565	gap repair protein	15	19	10	24113	23730	15192	0	28	7	23	4	11458	28652	6751	0	21	0.1995979724347982	1.0
	106557	107474		+	lpxC	b0096	UDP-3-O-acyl N-acetylglucosamine deacetylase	19	10	15	29996	12760	21220	0	23	19	19	19	28338	23855	30006	0	29	0.20092770941633503	1.0
218434			218458	+	-	predicted RNA	antisense: proS	289	313	298	446184	375969	415836	445	16506	244	257	241	359596	315663	366538	401	13890	0.20105818719202403	1.0
	1290242	1291255		+	rssB	b1235	PcnB-degradosome interaction factor; response regulator	17	36	27	26959	44303	38997	1	36	20	26	15	30515	32946	23098	0	28	0.20114313451990748	1.0
	4517717	4516764		-	fecR	b4292	FecI pro-sigma factor; transmembrane signal transducer for ferric citrate transport; periplasmic FecA:ferric citrate sensor and cytoplasmic FecI ECF sigma factor activator	19	11	13	30731	13263	18941	0	21	21	23	13	32240	28489	20254	0	28	0.20124915289861	1.0
	4379366	4379007		-	frdD	b4151	fumarate reductase (anaerobic), membrane anchor subunit	19	39	28	29961	46733	39600	2	107	33	35	33	48616	43990	50776	3	132	0.20128651298131542	1.0
	842056	841796		-	mcbA	b0806	colanic acid mucoidy stimulation protein	11	20	9	17113	24527	12913	1	69	7	11	9	11125	14014	14898	1	51	0.20131870274256022	1.0
	2618776	2618075		-	hda	b2496	ATPase regulatory factor involved in DnaA inactivation	60	70	64	93311	84102	89794	3	126	39	52	67	58316	64067	101788	3	106	0.20188813287722107	1.0
	2678361	2676850		-	yphE	b2547	putative sugar transporter subunit of ABC superfamily, ATP-binding component	52	55	66	81129	66095	92535	1	52	67	92	53	98804	112599	81437	1	64	0.20204328790889925	1.0
	441343	441101		-	xseB	b0422	exonuclease VII small subunit	15	14	11	24017	17040	15481	2	77	17	19	16	25196	23622	24590	2	100	0.20236352390658302	1.0
	3742532	3741684		-	yiaJ	b3574	transcriptional repressor of yiaK-S operon	33	42	35	51202	50551	49161	1	59	28	34	26	42247	41910	39488	1	48	0.20350657861936278	1.0
177624	177624	177001	175931	-	yadS	b0157	UPF0126 family inner membrane protein	231	277	269	356783	332312	376550	15	569	186	240	217	273488	294800	330451	13	480	0.20366860945506135	1.0
4019978			4020229	+	esrE	b4707	-	14	21	19	21846	25507	27033	2	98	13	27	27	19492	33045	41495	3	124	0.2043690159379448	1.0
	1838747	1839400		+	ynjD	b1756	putative ABC superfamily transporter ATP-binding subunit	17	21	16	26561	25792	22326	1	38	9	15	14	14506	19455	22636	0	28	0.20476293393787368	1.0
3429236	3429236	3429790	3432596	+	yrdA	b3279	bacterial transferase hexapeptide domain protein	378	324	327	583171	388641	457369	22	858	299	334	247	439216	408871	376229	21	735	0.2049929080748538	1.0
	577613	578110		+	rrrD	b0555	DLP12 prophage; putative lysozyme	181	222	219	279676	265958	306564	15	570	146	166	186	215539	203600	283714	13	470	0.20504367360766457	1.0
	1399526	1398774		-	fnr	b1334	oxygen-sensing anaerobic growth regulon transcriptional regulator; autorepressor	19	20	23	30238	24009	33118	1	38	23	30	25	34383	37255	38197	1	48	0.205568486588208	1.0
	4004862	4005731		+	pldA	b3821	outer membrane phospholipase A	26	25	24	40275	30740	34043	1	40	32	31	29	47301	38528	44818	1	50	0.20565411140422762	1.0
	1244728	1244982		+	ymgE	b1195	UPF0410 family putative inner membrane protein	0	4	5	1332	5321	7827	0	18	2	3	1	3859	3883	1910	0	12	0.20567679592475538	1.0
	1312246	1311848		-	yciA	b1253	acyl-CoA esterase	37	58	54	57916	69899	76302	4	170	38	48	35	56967	58832	54535	4	142	0.2058643266760477	1.0
	4360031	4358697		-	cadB	b4132	putative lysine/cadaverine transporter	16	23	10	25471	28215	14895	0	17	14	16	7	20918	19936	10668	0	12	0.20593754128659927	1.0
2029539	2029539	2030459	2033427	+	yedA	b1959	amino acid exporter for phenylalanine, threonine	300	415	386	462770	497917	539344	14	542	306	314	313	450597	385320	475130	13	474	0.20664102478802876	1.0
	2268854	2269567		+	lpxT	b2174	lipid A 1-diphosphate synthase; undecaprenyl pyrophosphate:lipid A 1-phosphate phosphotransferase	11	12	13	17139	15169	18635	0	23	19	18	10	28201	22101	15928	0	30	0.20710147007034432	1.0
	1771071	1772285		+	ydiM	b1690	MFS superfamily sugar transport 1 family protein	6	6	3	10598	7894	4260	0	6	5	10	7	7368	13187	11967	0	8	0.20721087508368932	1.0
	2391505	2390048		-	nuoN	b2276	NADH:ubiquinone oxidoreductase, membrane subunit N	22	32	22	33976	39512	30905	0	23	29	44	20	43980	54481	31324	0	29	0.20736351158411623	1.0
2284367			2284185	-	-	predicted RNA	antisense: yejL	2415	2684	2252	3719518	3215659	3143051	497	18357	2331	2505	1987	3424436	3066742	3016704	502	17318	0.20751889412189536	1.0
	3435207	3436496		+	rsmB	b3289	16S rRNA m(5)C967 methyltransferase, SAM-dependent	60	66	65	93078	79134	90818	1	67	56	56	45	82257	69508	69024	1	57	0.20771754664784273	1.0
	1534024	1534869		+	nhoA	b1463	N-hydroxyarylamine O-acetyltransferase	57	67	75	88821	81346	104863	2	108	51	61	53	75981	75705	80722	2	91	0.20783579149509832	1.0
	1865636	1864782		-	yeaE	b1781	aldo-keto reductase, methylglyoxal to acetol, NADPH-dependent	67	54	58	103876	65666	81116	2	97	53	43	51	78176	53264	78262	2	81	0.20836135788553284	1.0
	14168	15298		+	dnaJ	b0015	chaperone Hsp40, DnaK co-chaperone	7	9	7	12207	11855	10288	0	10	8	12	12	12807	14991	18649	0	13	0.2085837192730116	1.0
	1765122	1764934		-	ydiH	b1685	uncharacterized protein	13	20	12	20704	24234	18016	3	111	9	10	13	14583	12246	20237	2	83	0.20867640155041284	1.0
	3103013	3104065		+	mutY	b2961	adenine DNA glycosylase	18	30	19	29122	36892	27900	0	29	15	24	13	22865	29784	20891	0	23	0.20882326551872374	1.0
499973	499973	499014		-	aes	b0476	acetyl esterase	234	237	239	360616	284912	334266	9	340	203	210	180	298804	257608	274180	8	288	0.2090883386672246	1.0
191663			189726	-	-	predicted RNA	antisense: rpsB tsf tff	266746	275077	243556	410805217	329478515	339864495	5016	185784	245423	267318	204347	360423821	327173922	310157519	4989	171612	0.2092958422354679	1.0
	2905557	2905697		+	yqcG	b4682	uncharacterized protein	2	0	0	3426	877	1378	0	13	1	0	0	1741	1153	514	0	8	0.2093437045012777	1.0
	4410133	4410534		+	yjfI	b4181	DUF2170 family protein	0	1	0	0	1544	0	0	1	0	1	0	0	1238	0	0	1	0.20934834435732075	1.0
	2572450	2572157		-	eutM	b2457	ethanolamine utilization protein, putative carboxysome structural protein	17	16	17	26648	19974	24613	2	80	19	24	20	29021	30053	31053	2	102	0.2093750100749259	1.0
	4473209	4472814		-	yjgH	b4248	UPF0131 family protein	9	14	17	14725	17354	24036	1	47	17	16	17	25742	20325	26517	1	61	0.209548093357656	1.0
	2451584	2451072		-	yfcR	b2335	putative fimbrial-like adhesin protein	22	36	15	33950	43596	22318	1	64	14	25	17	21396	31319	25837	1	51	0.20977615327970672	1.0
	2893919	2894179		+	ygcO	b2767	putative 4Fe-4S cluster-containing protein	7	3	6	11861	4763	8719	0	32	11	9	4	16717	11298	7519	1	45	0.21016147374455124	1.0
	3201207	3201827		+	ygiM	b3055	SH3 domain protein	27	27	39	41650	32537	54859	1	69	24	25	23	36057	30696	36025	1	55	0.21028931747519733	1.0
	3206463	3207374		+	ttdA	b3061	L-tartrate dehydratase, alpha subunit	13	16	15	21422	20191	21121	0	22	17	20	19	25657	25610	29091	0	29	0.2104783544492679	1.0
	386207	386974		+	tauB	b0366	taurine transporter subunit	3	8	7	5355	10759	10337	0	11	4	5	3	6907	6749	4911	0	8	0.21086240930570532	1.0
	3441675	3441055		-	rpsD	b3296	30S ribosomal subunit protein S4	57	81	89	88406	97740	124201	4	166	82	93	66	120628	114658	100889	5	180	0.21104890437442617	1.0
	2797520	2798044		+	ygaP	b2668	DUF2892 family inner membrane rhodanese	110	104	117	169458	124785	164594	7	291	80	89	89	118536	109826	135519	6	231	0.21112256596696105	1.0
	1907591	1907448		-	yobF	b1824	DUF2527 family heat-induced protein	6	4	3	10036	5859	5218	1	48	8	5	7	12764	6572	10947	1	70	0.21132521875160792	1.0
	1178593	1179504		+	nagK	b1119	N-acetyl-D-glucosamine kinase	1	7	4	2933	9486	6448	0	6	4	7	7	5882	9437	12002	0	9	0.21185236865529988	1.0
208422			208133	-	-	predicted RNA	antisense: dnaE	4295	4462	3706	6615686	5345025	5172066	532	19692	4114	4246	3178	6042418	5197056	4824040	536	18463	0.2119909657050874	1.0
	2386934	2387437		+	yfbM	b2272	DUF1877 family protein	2	2	5	3218	2415	7497	0	8	1	0	3	2544	360	5748	0	5	0.21200012634557228	1.0
	3994762	3995586		+	dapF	b3809	diaminopimelate epimerase	11	9	11	17935	11759	15919	0	18	13	20	9	19381	25157	14829	0	23	0.21251512077326448	1.0
	2659886	2659563		-	iscA	b2528	FeS cluster assembly protein	5	3	3	8859	3899	4632	0	17	4	1	2	6053	1966	3698	0	12	0.21279663148219796	1.0
	1188240	1187119		-	roxA	b1128	50S ribosomal protein L16 arginine hydroxylase; 2-oxoglutarate oxygenase	34	35	28	52716	42071	40252	1	40	27	51	37	40539	62999	57274	1	47	0.2128123717503352	1.0
	2489168	2488023		-	yfdE	b2371	acetyl-CoA:oxalate CoA-transferase	42	82	49	65314	98591	68829	1	67	72	70	61	106156	86522	93326	2	83	0.21324351274736014	1.0
	1889746	1888061		-	fadD	b1805	acyl-CoA synthetase (long-chain-fatty-acid--CoA ligase)	12	20	14	18541	24833	19560	0	12	19	23	15	27979	28475	24014	0	15	0.2134106583274551	1.0
	4530533	4530255		-	sgcB	b4565	putative enzyme IIB component of PTS	27	28	25	41590	34075	35306	3	132	26	38	33	38387	47584	50942	4	163	0.21352570444319452	1.0
1469358	1469358	1470509	1470509	+	insI1	b1404	IS30 transposase	411	462	388	633344	553790	541507	13	500	405	476	420	595696	583049	638005	15	525	0.21391913602789744	1.0
	3960677	3962698		+	rep	b3778	DNA helicase and single-stranded DNA-dependent ATPase	333	390	376	513825	468116	525109	6	248	318	359	273	467887	440275	415413	6	218	0.2140663640804573	1.0
	3221466	3222449		+	ebgR	b3075	transcriptional repressor	14	15	15	21621	18919	21154	0	20	20	17	18	30029	21570	27398	0	26	0.21464995199348783	1.0
3270592			3270216	-	rnpB	b3123	-	256	216	221	394601	258745	308405	22	850	124	350	134	182428	429395	204335	21	721	0.2151867157435213	1.0
	1126806	1127729		+	yceM	b1068	putative oxidoreductase	4	12	14	6912	15441	20890	0	15	14	12	12	20841	15840	19696	0	20	0.21533450725379344	1.0
	318319	317726		-	rclC	b0301	reactive chlorine species (RCS) stress resistance inner membrane protein	5	12	12	8920	14400	16885	0	22	4	5	10	6693	6430	15945	0	16	0.21539071746681618	1.0
	151599	151003		-	yadK	b0136	putative fimbrial-like adhesin protein	22	36	33	35083	43847	46437	1	69	31	45	32	46977	55281	49145	2	84	0.21542449205181993	1.0
	1367912	1366935		-	pspF	b1303	psp operon transcriptional activator	13	23	35	21482	28535	48872	0	33	18	20	16	27484	25235	25270	0	26	0.21552723812662453	1.0
1386720	1386720	1388261	1388832	+	tyrR	b1323	aromatic amino acid biosynthesis and transport regulon transcriptional regulator; autorepressor; ATPase; phosphatase	422	464	442	650268	556540	617991	10	394	399	404	347	586953	495231	527006	10	347	0.21566396523900272	1.0
	1582524	1580842		-	ydeN	b1498	putative Ser-type periplasmic non-aryl sulfatase	26	28	19	40327	34143	27867	0	20	30	44	19	44091	54021	28838	0	25	0.2158829752179199	1.0
	1069839	1068511		-	rutG	b1006	pyrimidine permease	11	24	22	17901	29685	31913	0	19	21	30	20	30976	37502	31175	0	24	0.21594967761919778	1.0
	2347384	2348514		+	nrdB	b2235	ribonucleoside-diphosphate reductase 1, beta subunit, ferritin-like protein	64	110	86	99956	131904	121179	2	104	67	94	63	99649	116031	96153	2	91	0.21626239524808663	1.0
	2606917	2608497		+	hyfF	b2486	hydrogenase 4, membrane subunit	49	56	52	75800	67605	73635	1	45	46	49	35	68066	60049	53628	1	38	0.2165793410937549	1.0
	3090347	3091054		+	endA	b2945	DNA-specific endonuclease I	6	7	6	10434	9309	8554	0	13	7	9	10	11048	12147	15727	0	18	0.21659615146506472	1.0
	492092	494023		+	dnaX	b0470	DNA polymerase III/DNA elongation factor III, tau and gamma subunits	23	28	26	35888	34469	37106	0	18	21	19	19	30848	24244	29867	0	14	0.21669649009287154	1.0
	1890532	1889951		-	yeaY	b1806	Slp family lipoprotein, RpoE-regulated	7	8	6	11299	9922	8463	0	17	9	10	8	14404	12734	13433	0	23	0.21689881134292882	1.0
	3249375	3249680		+	yqjD	b3098	membrane-anchored ribosome-binding protein	1	4	0	3036	5845	933	0	10	1	7	1	2715	8857	2861	0	15	0.21715198756025858	1.0
	2128888	2128340		-	wcaF	b2054	putative acyl transferase	2	3	1	3331	3620	2130	0	5	3	1	4	4721	1846	6873	0	8	0.21724297655041885	1.0
931917			932038	+	-	predicted RNA	antisense: trxB	1511	1760	1776	2328110	2108370	2478713	511	18893	1324	1695	1354	1944629	2075656	2055495	483	16600	0.21735526287713447	1.0
	4313350	4313799		+	rpiB	b4090	ribose 5-phosphate isomerase B/allose 6-phosphate isomerase	2	2	2	4481	3355	3195	0	8	2	4	4	3475	5716	6908	0	11	0.217840073124757	1.0
1321253			1321491	+	-	predicted RNA	antisense: trpD trpE	2281	2257	2873	3513739	2703593	4009297	382	14263	2012	2552	2528	2955780	3123728	3838241	400	13832	0.21833630983620064	1.0
	3692607	3690268		-	bcsB	b3532	regulator of cellulose synthase, cyclic di-GMP binding	41	38	44	64016	46018	62439	0	24	27	44	35	39788	54411	53201	0	20	0.21857026441871125	1.0
	1335124	1335288		+	ymiA	b4522	uncharacterized protein	6	10	9	10096	12413	12649	1	71	5	3	7	8623	4810	12055	1	51	0.2185810249765138	1.0
	1850860	1851876		+	ansA	b1767	cytoplasmic L-asparaginase 1	20	24	26	31251	29011	36520	0	31	33	32	19	49837	40332	30146	1	39	0.21903769555462776	1.0
	1212003	1211680		-	iraM	b1160	RpoS stabilzer during Mg starvation, anti-RssB factor	7	8	4	12086	10146	5903	0	28	2	6	4	4234	8468	7318	0	20	0.21918906895965512	1.0
	2446384	2445560		-	mepA	b2328	murein DD-endopeptidase	22	33	36	34685	39710	50309	1	50	33	46	29	48642	57375	44530	1	60	0.22004331989594106	1.0
2947497			2947573	+	metW	b2815	Met tRNA	13	19	12	20868	23097	17422	7	265	7	16	10	11133	19646	15378	5	199	0.22059516820071323	1.0
	3772281	3774194		+	mtlA	b3599	fused mannitol-specific PTS enzymes: IIA components/IIB components/IIC components	44	40	31	68887	48108	43803	0	28	49	57	33	72062	70095	50462	0	33	0.22063000128214247	1.0
	3535868	3534516	3532689	-	envZ	b3404	sensory histidine kinase in two-component regulatory system with OmpR	364	416	416	562086	498761	580810	10	404	376	433	355	552544	530399	539113	11	399	0.22093056395263938	1.0
	2466545	2467702		+	intS	b2349	CPS-53 (KpLE1) prophage; putative prophage CPS-53 integrase	73	90	78	113107	108887	109388	2	95	84	109	72	124248	134234	110136	3	106	0.22137730101576691	1.0
	519149	518340		-	ybbO	b0493	putative oxidoreductase	26	33	23	40621	40411	32540	1	46	26	54	22	38977	66621	33801	1	57	0.22141671125175197	1.0
	2188414	2187380		-	yehA	b2108	putative fimbrial-like adhesin protein	17	12	15	26881	14733	21063	0	20	11	12	9	17102	15238	14872	0	15	0.22154205336121519	1.0
	2395345	2395043		-	nuoK	b2279	NADH:ubiquinone oxidoreductase, membrane subunit K	5	9	9	7942	11759	13524	1	36	14	12	5	21285	15132	8295	1	49	0.22161033730854912	1.0
	4293543	4294139		+	nrfG	b4076	heme lyase (NrfEFG) for insertion of heme into c552, subunit NrfG	42	37	38	65885	45147	53860	2	92	30	38	32	45346	46685	48682	2	78	0.22184415213479752	1.0
	4370412	4369156		-	yjeH	b4141	putative transporter	46	74	64	72166	89492	89934	1	66	57	96	63	84622	117608	96554	2	79	0.22259047428437442	1.0
	4426108	4426557		+	rplI	b4203	50S ribosomal subunit protein L9	13	18	23	20868	21729	33217	1	56	22	21	23	33145	26487	35258	2	70	0.2228083164710222	1.0
	1828259	1826916		-	astB	b1745	succinylarginine dihydrolase	5	6	8	7856	7662	11956	0	6	6	2	4	9929	2907	6716	0	4	0.2228209897909649	1.0
	1552682	1552398		-	yddM	b1477	putative DNA-binding transcriptional regulator	1	2	2	2448	2599	3451	0	9	0	3	4	495	4556	7458	0	14	0.22334081541211115	1.0
3878132			3878278	+	-	predicted RNA	antisense: gyrB	1763	1851	1757	2716075	2218014	2451944	452	16748	1535	1625	1309	2255592	1989508	1986994	410	14131	0.22352718523071896	1.0
	902988	902257		-	artI	b0863	arginine transporter subunit	10	17	14	15564	21348	20609	0	26	12	8	8	18903	10930	13328	0	19	0.22388981923628956	1.0
	427647	429494		+	secD	b0408	SecYEG protein translocase auxillary subunit	22	31	30	34512	37300	42572	0	20	39	34	26	57838	42122	40195	0	25	0.22397877659940044	1.0
	338325	339743		+	yahG	b0321	DUF1116 family protein	16	21	14	25229	25670	19684	0	16	15	15	8	22301	18712	12735	0	12	0.2240413480288121	1.0
	1224545	1224279		-	minE	b1174	cell division topological specificity factor	13	8	6	21465	10541	8719	1	50	14	13	10	21866	16130	15186	1	66	0.2241494812741447	1.0
	1710204	1710824		+	rsxG	b1631	SoxR iron-sulfur cluster reduction factor component; putative membrane protein of electron transport complex	0	3	2	1003	4723	3162	0	4	4	2	2	6130	2454	4501	0	7	0.2250432845641717	1.0
	3757827	3756676		-	yiaY	b3589	putative Fe-containing alcohol dehydrogenase, Pfam00465 family	10	10	7	15833	13046	10378	0	11	12	12	12	17708	15111	18675	0	14	0.2254235680793692	1.0
	1083376	1084647		+	efeB	b1019	deferrrochelatase, periplasmic	35	35	14	54646	42534	19800	0	30	22	27	17	33598	33491	25933	0	24	0.22548033568954384	1.0
	3589180	3588110		-	ugpC	b3450	glycerol-3-phosphate transporter subunit	3	4	2	5545	5158	3781	0	4	1	2	3	1562	3657	4614	0	3	0.22721238845802308	1.0
	3301485	3302480		+	yhbU	b3158	U32 peptidase family protein	38	36	30	59889	44140	42969	1	49	22	37	27	32710	45956	42349	1	40	0.22755190390126734	1.0
	1029969	1028779		-	rlmI	b0967	23S rRNA m(5)C1962 methyltransferase, SAM-dependent	75	70	54	115668	84088	75997	2	77	59	62	47	87303	76151	71571	1	65	0.2276613172843498	1.0
	1458264	1459052		+	paaG	b1394	1,2-epoxyphenylacetyl-CoA isomerase, oxepin-CoA-forming	2	0	0	3088	0	0	0	1	1	0	1	1596	1131	2032	0	2	0.22852177275472277	1.0
	220928	220113		-	metQ	b0197	DL-methionine transporter subunit	34	33	42	52863	40676	59582	1	62	20	41	31	29585	50413	47592	1	52	0.22857503471363277	1.0
	1273599	1273246		-	ychN	b1219	putative sulfur relay protein	43	46	55	66923	55369	77491	5	188	41	43	35	61441	52911	54003	4	158	0.22871407294420823	1.0
	4105670	4104972		-	cpxR	b3912	response regulator in two-component regulatory system with CpxA	41	24	47	63575	29297	66650	2	76	39	54	42	58512	66982	64296	2	90	0.22899943302011583	1.0
	573371	573733		+	rusA	b0550	DLP12 prophage; endonuclease RUS	7	10	3	11247	12113	4665	0	25	2	6	5	4243	7824	8025	0	18	0.22907872516461814	1.0
	2493254	2492004		-	frc	b2374	formyl-CoA transferase, NAD(P)-binding	12	8	13	19311	9827	18908	0	12	9	5	9	14164	7003	14026	0	9	0.22988138312126663	1.0
	579594	579184		-	ybcV	b0558	DLP12 prophage; uncharacterized protein	21	19	23	33431	23553	32103	1	72	18	15	15	27493	18903	23822	1	56	0.23097394584293934	1.0
	4042415	4043401		+	srkA	b3859	stress response kinase A; MazF antagonist; Thr/Ser kinase involved in Cpx stress response	24	40	37	37376	47971	52918	1	46	40	37	37	59434	45914	57623	1	55	0.23138718152608792	1.0
	4318764	4318006		-	phnK	b4097	carbon-phosphorus lyase complex subunit, putative ATP transporter ATP-binding protein	23	44	30	36277	53355	43208	1	58	35	45	32	52134	56059	49450	2	69	0.2314290379355419	1.0
	2385722	2383995		-	yfbK	b2270	Von Willebrand factor domain putative lipoprotein	78	82	82	121007	99271	115630	1	64	68	84	63	101161	103084	96449	1	58	0.23149826222068595	1.0
	3446140	3445607		-	rplF	b3305	50S ribosomal subunit protein L6	55	46	76	84919	55662	106778	4	154	64	75	71	94467	93003	108068	5	184	0.23150796325803785	1.0
	1783031	1784677		+	fadK	b1701	short chain acyl-CoA synthetase, anaerobic	53	73	55	83016	88335	77929	1	50	43	67	42	63251	82384	65020	1	42	0.23155455815197049	1.0
	3899393	3898671		-	yieK	b3718	putative 6-phosphogluconolactonase	66	86	83	102041	103463	117100	4	148	59	79	66	87986	97842	100270	3	131	0.2316563657959399	1.0
	595443	594760		-	cusR	b0571	response regulator in two-component regulatory system with CusS	7	5	12	11230	6193	16835	0	16	6	5	6	9118	6154	9778	0	12	0.2317901040512622	1.0
	2107226	2106060		-	wbbH	b2035	O-antigen polymerase	2	8	2	3789	10752	3889	0	5	10	6	1	15607	8213	2590	0	7	0.2322119540372832	1.0
	2375003	2373648		-	menE	b2260	O-succinylbenzoate-CoA ligase	38	50	43	59603	60351	60160	1	44	44	72	44	65181	88977	67803	1	54	0.23238294615233715	1.0
	2517832	2515643		-	yfeA	b2395	putative diguanylate cyclase	42	55	58	65192	66578	81735	0	32	52	63	71	77288	77658	109263	1	40	0.23276318800567303	1.0
	1207501	1208130		+	stfP	b1154	e14 prophage; uncharacterized protein	1	1	3	1661	1925	4186	0	4	0	1	1	990	2037	1683	0	2	0.2328725024555807	1.0
	4543115	4543663		+	fimA	b4314	major type 1 subunit fimbrin (pilin)	12	13	14	19821	15686	20857	0	34	13	27	12	19492	34149	18326	1	43	0.23338049562621455	1.0
4275077	4275041	4274760	4274027	-	yjcB	b4060	putative inner membrane protein	284	356	274	437982	427140	383345	40	1475	268	270	221	393673	331651	336933	36	1255	0.23397936197324026	1.0
	2451075	2450587		-	yfcQ	b2334	putative fimbrial-like adhesin protein	29	38	21	45319	46706	29832	2	83	26	26	16	39523	32281	25715	1	66	0.23410549366175706	1.0
	1862771	1863766		+	gapA	b1779	glyceraldehyde-3-phosphate dehydrogenase A	19	34	29	29589	40894	40541	1	37	43	32	21	64386	39434	31934	1	45	0.23461143697201256	1.0
	1555669	1553972		-	maeA	b1479	malate dehydrogenase, (decarboxylating, NAD-requiring) (malic enzyme)	15	21	17	23922	26248	24539	0	14	22	29	15	33418	35988	23656	0	18	0.23467945676368665	1.0
	4579337	4577958		-	mcrB	b4346	5-methylcytosine-specific restriction enzyme McrBC, subunit McrB	30	21	15	46495	25159	22318	0	22	16	17	18	24769	21153	28707	0	18	0.23510774345315805	1.0
	1673913	1674947		+	tqsA	b1601	pheromone AI-2 transporter	117	121	158	181000	144943	221146	4	176	79	108	118	117358	133010	180600	4	138	0.23530620838004868	1.0
	4390360	4389392		-	psd	b4160	phosphatidylserine decarboxylase	23	30	32	35776	37035	44835	1	40	15	34	18	23446	42249	28297	0	32	0.23554088293501252	1.0
	3142989	3141286		-	hybC	b2994	hydrogenase 2, large subunit	25	31	43	39522	38131	61266	0	27	41	33	39	61501	41365	60467	0	31	0.2364295290391342	1.0
	4082759	4081857		-	fdoH	b3893	formate dehydrogenase-O, Fe-S subunit	30	38	32	47248	45855	46024	1	51	22	36	23	32522	44711	36392	1	41	0.23758081531130892	1.0
	3278914	3280194		+	kbaZ	b3132	tagatose 6-phosphate aldolase 1, kbaZ subunit	45	44	37	69709	52797	51961	1	45	41	65	47	61398	79589	72208	1	55	0.2380446884102142	1.0
	2878853	2878569		-	ygbF	b2754	CRISPR adaptation ssRNA endonuclease	4	5	5	6212	6152	8223	0	24	3	5	2	4952	6218	3218	0	16	0.23828477307038634	1.0
	247637	248134		+	rayT	b0228	RAYT REP element-mobilizing transposase; TnpA(REP)	14	15	17	22356	18544	24845	1	44	10	12	12	15514	15146	19504	0	33	0.23843269371556466	1.0
	320227	321081		+	rclR	b0305	reactive chlorine species (RCS)-specific activator of the rcl genes	7	8	3	11143	10017	5350	0	10	7	8	10	10553	10024	15683	0	14	0.23875779666635147	1.0
	2505547	2504510		-	ypdE	b2384	aminopeptidase	17	20	11	26189	24363	16068	0	21	21	16	21	31079	20374	32152	0	26	0.23973528125246996	1.0
	3431415	3430843		-	tsaC	b3282	tRNA(ANN) t(6)A37 threonylcarbamoyladenosine modification protein, threonine-dependent ADP-forming ATPase	8	16	12	12631	19232	18057	0	29	12	19	14	18297	23494	21990	1	37	0.2398202169856911	1.0
	648035	647484		-	citX	b0614	apo-citrate lyase phosphoribosyl-dephospho-CoA transferase	17	7	11	27219	8697	16497	0	31	13	27	9	19996	33165	13712	1	40	0.23987839663217495	1.0
	4004697	4004230		-	yigI	b3820	4HBT thioesterase family protein	11	18	12	17234	22655	17438	1	40	7	11	11	11296	14326	17821	0	30	0.24134099739810375	1.0
	580834	581379		+	nohD	b0560	DLP12 prophage; DNA packaging protein	5	10	4	8297	12603	6696	0	16	9	7	10	13541	8616	15326	0	22	0.24140412398486152	1.0
	2297644	2297021		-	ccmA	b2201	heme exporter subunit	2	4	0	4057	5675	1155	0	5	1	0	3	2083	226	4719	0	3	0.241455619677899	1.0
	4106469	4107371		+	fieF	b3915	ferrous iron and zinc transporter	33	68	47	52076	82503	66873	2	74	33	46	43	48761	56299	65457	1	62	0.24173554150965154	1.0
4106339			4106159	-	-	predicted RNA	antisense: cpxP	1869	3141	2120	2879546	3763161	2959384	487	17683	1478	2570	1627	2171593	3146664	2470237	423	14343	0.24187858600448106	1.0
	2582777	2581734		-	ypfG	b2466	DUF1176 family protein	37	30	33	57354	36695	46148	1	44	22	32	27	33051	39922	41957	1	36	0.24207938128290712	1.0
	1638667	1638455		-	cspI	b1552	Qin prophage; cold shock protein	0	1	0	0	2184	0	0	3	0	2	0	0	3544	218	0	5	0.24210952717016757	1.0
3700136			3700201	+	rdlD	b4454	-	24	19	12	37757	23621	17702	10	399	12	23	9	18306	29062	14305	9	311	0.24241895993507195	1.0
	1198237	1197533		-	ymfE	b1138	e14 prophage; putative inner membrane protein	23	17	20	35810	21416	28015	1	40	17	19	11	26383	23275	17541	0	31	0.24242329390089432	1.0
192025			191824	-	-	predicted RNA	antisense: pyrH	2623	2615	2389	4040353	3133217	3334216	467	17339	2812	2607	2216	4130251	3190873	3363930	509	17632	0.24255989759032853	1.0
	552594	551527		-	purK	b0522	N5-carboxyaminoimidazole ribonucleotide synthase	12	14	14	19994	17258	19643	0	17	6	11	12	9912	14347	18859	0	13	0.24256407138376937	1.0
	2871304	2870255		-	truD	b2745	tRNA(Glu) pseudouridine(13) synthase	5	7	3	9050	8568	4260	0	6	6	9	6	10083	11305	9289	0	9	0.24262667239593222	1.0
	1953442	1954413		+	cmoB	b1871	tRNA (cmo5U34)-carboxymethyltransferase, carboxy-SAM-dependent	9	10	12	14474	13155	17942	0	15	12	3	7	18203	4223	11104	0	11	0.24290401338644976	1.0
	417889	419184		+	phoR	b0400	sensory histidine kinase in two-component regulatory system with PhoB	40	64	45	62787	77221	62942	1	52	51	76	53	75956	93519	81629	1	64	0.24295365176353942	1.0
	1040617	1041915		+	appA	b0980	phosphoanhydride phosphorylase	31	32	21	48183	39403	29642	0	30	16	34	18	24871	41747	27372	0	24	0.24394747402945152	1.0
	1071765	1070965		-	rutD	b1009	putative aminoacrylate hydrolase, reactive intermediate detoxification	16	21	15	25947	25173	21038	0	30	10	21	9	15249	25949	14471	0	23	0.24397961771573135	1.0
	1064036	1065292		+	yccE	b1001	uncharacterized protein	2	3	2	4109	4137	2914	0	2	0	3	1	905	3792	2564	0	1	0.24405821456027996	1.0
	2414747	2416891		+	pta	b2297	phosphate acetyltransferase	28	68	51	43675	82543	71439	0	30	49	43	27	73360	53137	41111	0	26	0.24433301834026902	1.0
	1267320	1268129		+	ychA	b1214	transglutaminase-like TPR-repeat protein	9	13	1	14898	16101	2749	0	13	10	13	8	15479	16667	12604	0	18	0.24555954226182372	1.0
4595990	4595990	4597012	4599482	+	yjjN	b4358	L-galactonate oxidoreductase	302	392	386	466386	470634	538791	13	480	256	324	344	377373	397651	522418	12	422	0.24577650099207038	1.0
	4321696	4321244		-	phnG	b4101	ribophosphonate triphosphate synthase subunit	15	18	10	23654	21566	14400	1	43	14	9	7	21473	11835	12098	0	33	0.24609742408327917	1.0
	3573502	3571316		-	glgB	b3432	1,4-alpha-glucan branching enzyme	32	47	42	50571	57472	58739	0	25	38	36	28	55874	44308	43606	0	21	0.24634357069301133	1.0
	1167599	1168138		+	ycfJ	b1110	uncharacterized protein	76	96	91	117269	115523	127198	6	222	91	71	63	134306	87315	95987	5	196	0.24637994080492845	1.0
1320775			1320996	+	-	predicted RNA	antisense: trpD	2363	2397	2798	3639816	2871205	3904516	420	15638	2144	2633	2527	3149342	3222928	3835633	444	15327	0.24643946199099284	1.0
	3965761	3966090		+	trxA	b3781	thioredoxin 1	67	82	57	104438	98298	80323	7	285	74	87	65	109212	106812	99598	9	318	0.24705248686369413	1.0
	2352374	2351016		-	glpT	b2240	sn-glycerol-3-phosphate transporter	28	38	35	44350	46508	48881	0	34	32	34	16	47643	41853	25261	0	28	0.24758842524431995	1.0
	3977525	3978604		+	wecF	b4481	TDP-Fuc4NAc:lipidIIFuc4NAc transferase	19	12	11	30550	15434	15465	0	18	10	13	9	16137	16066	14715	0	14	0.2476023359872642	1.0
	2919385	2918045		-	gudD	b2787	(D)-glucarate dehydratase 1	109	136	122	169034	163692	171571	3	125	91	95	97	134528	117325	147688	2	99	0.24792261476776314	1.0
	912150	911182		-	hcr	b0872	HCP oxidoreductase, NADH-dependent	9	13	10	15391	16673	15052	0	16	13	17	13	19202	20940	19923	0	20	0.24796538251412686	1.0
4610990			4610831	-	-	predicted RNA	antisense: prfC	2300	2525	2376	3543173	3025166	3316654	556	20593	1987	2169	1736	2919373	2655111	2635938	496	17105	0.24796721617900638	1.0
	141225	138835		-	gcd	b0124	glucose dehydrogenase	67	120	90	103183	143983	125802	1	51	73	77	80	107769	94856	122138	1	45	0.24800136549192964	1.0
706386			706376	-	-	predicted RNA	antisense: glnS	129	142	131	199792	170634	182908	453	16767	104	114	96	152996	140219	146231	386	13316	0.2484114892779436	1.0
	3140799	3140311		-	hybE	b2992	hydrogenase 2-specific chaperone	6	4	2	10192	5743	4120	0	13	5	3	1	8094	3671	2329	0	9	0.24875363874013331	1.0
	1860229	1858850		-	ydjK	b1775	putative transporter	4	1	5	6445	1653	8174	0	3	4	2	0	7197	3098	1003	0	2	0.24941042865294627	1.0
	3623399	3623782		+	yhhH	b3483	putative immunity protein for putative polymorphic toxin RhsB	0	0	0	467	578	0	0	0	0	0	0	162	49	662	0	0	0.24946136024738283	1.0
2167114			2167200	+	cyaR	b4438	-	7	3	7	11948	3947	10279	2	100	5	4	3	8102	4945	5870	2	72	0.24949188958028246	1.0
	3373576	3372683		-	nanA	b3225	N-acetylneuraminate lyase	6	9	4	9534	11412	6209	0	10	8	11	6	12576	14043	10144	0	13	0.2498226889210575	1.0
	845480	843255		-	ybiO	b0808	mechanosensitive channel protein, intermediate conductance	334	375	343	514967	449353	479060	5	216	333	297	267	489967	363551	405617	5	188	0.25008689398884915	1.0
3882725			3882989	+	-	predicted RNA	antisense: dnaA	2774	2999	2568	4272469	3592568	3584840	389	14402	3724	3821	2893	5469646	4677382	4391181	531	18287	0.2505054355263196	1.0
	963828	964112		+	ihfB	b0912	integration host factor (IHF), DNA-binding protein, beta subunit	4	6	10	6393	8329	15085	0	34	6	5	3	8965	7117	5792	0	25	0.25110082828775765	1.0
	1893367	1893711		+	yoaB	b1809	putative reactive intermediate deaminase	6	9	6	10044	11753	8991	0	29	8	8	11	12918	10470	17629	1	39	0.25122487482429906	1.0
3776380	3776380	3776171	3774409	-	yibT	b4554	uncharacterized protein	64	78	90	99394	93881	126298	13	507	76	99	72	111834	121896	110127	15	545	0.2513623240587715	1.0
	45463	45750		+	fixX	b0044	putative 4Fe-4S ferredoxin-type protein	1	2	0	2889	2545	1172	0	7	2	3	0	3842	4740	994	0	11	0.251780082910059	1.0
	1024348	1023902		-	yccF	b0961	DUF307 family inner membrane protein	8	7	8	13125	9439	11361	0	25	5	5	7	8060	6409	10650	0	18	0.25234792935291783	1.0
	1779617	1780381		+	ydiQ	b1697	putative electron transfer flavoprotein subunit	13	21	20	21318	26133	29081	0	33	21	27	19	31198	34128	29143	1	41	0.25266306156700585	1.0
	558974	559666		+	sfmC	b0531	putative periplasmic pilus chaperone	28	38	21	44497	45882	30014	1	57	33	42	28	49906	51559	43335	2	69	0.25291988353419037	1.0
	1175165	1174092		-	ycfT	b1115	inner membrane protein	35	36	35	55346	43119	48938	1	45	37	44	40	54952	54163	62133	1	53	0.25294993433671087	1.0
	1027946	1028359		+	yccU	b0965	putative CoA-binding protein	22	36	15	35248	43214	22153	2	81	17	18	22	24982	22221	33644	1	65	0.2531976072320134	1.0
	4196099	4194204		-	thiC	b3994	phosphomethylpyrimidine synthase	47	39	48	72867	46991	67385	0	32	42	42	29	63114	51524	45411	0	28	0.2532250875782711	1.0
	2401555	2400218		-	nuoF	b2284	NADH:ubiquinone oxidoreductase, chain F	7	7	9	11775	9480	12847	0	8	8	8	15	11825	9925	23229	0	11	0.2535419109827796	1.0
1153106			1147995	-	-	predicted RNA	antisense: fabD plsX fabF acpP fabH fabG	199733	186758	171618	307602085	223693391	239480455	1351	50259	172449	183684	135967	253256275	224813845	206371484	1298	44629	0.25365118780614776	1.0
	2758600	2757644		-	yfjH	b2623	CP4-57 prophage; uncharacterized protein	11	27	16	17727	33387	23152	0	25	24	26	15	36390	31906	23482	0	31	0.25385826570979914	1.0
	3247773	3248435		+	yqjA	b3095	general envelope maintenance protein; DedA family inner membrane protein	17	17	13	27020	20960	18743	0	33	16	10	9	24701	12776	13921	0	25	0.2541935975341716	1.0
	3258010	3256679		-	yhaO	b3110	putative transporter	89	129	99	137506	155471	138576	2	107	120	152	115	177108	186133	175907	3	134	0.25519437627556546	1.0
	1688377	1686731		-	fumA	b1612	fumarate hydratase (fumarase A), aerobic Class I	9	10	10	14786	13148	14168	0	8	13	9	15	19603	11262	22950	0	10	0.2553286971859304	1.0
	2512706	2511468		-	mntH	b2392	manganese/divalent cation transporter	23	26	14	36649	31182	20130	0	23	20	39	20	29619	47782	30617	0	29	0.25544399981226423	1.0
	943414	944031		+	dmsB	b0895	dimethyl sulfoxide reductase, anaerobic, subunit B	7	4	10	12043	5301	14812	0	17	5	13	12	7675	16462	18422	0	22	0.25545305117460393	1.0
	3231665	3233683		+	fadH	b3081	2,4-dienoyl-CoA reductase, NADH and FMN-linked	60	63	62	93580	75588	86995	1	42	68	87	59	101306	107343	90788	1	49	0.25572369269597295	1.0
1409129			1409250	+	fnrS	b4699	-	14	9	11	21578	10997	15630	3	131	10	7	7	15257	9310	11383	2	98	0.2573863956997889	1.0
	4370688	4370981		+	groS	b4142	Cpn10 chaperonin GroES, small subunit of GroESL	4	4	4	7682	5036	5738	0	20	7	4	6	11279	5129	9621	0	29	0.2574653088085755	1.0
	1279864	1283607		+	narG	b1224	nitrate reductase 1, alpha subunit	31	32	21	48304	39172	29559	0	10	35	42	24	52518	51977	36723	0	12	0.2576087850478349	1.0
	4560930	4561484		+	kptA	b4331	RNA 2'-phosphotransferase	31	38	33	49221	46195	46222	2	85	21	37	26	32112	45383	39733	2	70	0.2578610275775584	1.0
	4368327	4366891		-	aspA	b4139	aspartate ammonia-lyase	141	149	137	217598	178644	192370	3	136	104	133	103	153406	162999	157745	3	109	0.2581615324815452	1.0
	1884665	1885789		+	yeaW	b1802	putative YeaWX dioxygenase alpha subunit; 2Fe-2S cluster	5	16	9	8998	20130	13582	0	12	12	14	12	18562	17453	18440	0	16	0.25818574266625394	1.0
	4070401	4069475		-	yihR	b3879	mutarotase superfamily protein, YihR family	12	15	10	18601	19075	14466	0	18	7	13	7	11663	16950	10799	0	14	0.2582044607597203	1.0
	3274907	3273573		-	garP	b3127	putative (D)-galactarate transporter	18	36	35	29183	43766	49145	0	30	24	21	23	35758	26805	36209	0	24	0.2584374422202013	1.0
	3372574	3371084		-	nanT	b3224	sialic acid transporter	11	28	13	17035	33891	19304	0	15	14	13	11	20739	16299	17437	0	12	0.2587679830991679	1.0
618254	618254	619387	622221	+	fepE	b0587	regulator of length of O-antigen component of lipopolysaccharide chains	303	337	309	467727	404171	431227	10	383	262	284	253	384964	348680	384726	9	328	0.25909068314990175	1.0
	137083	138633		+	cueO	b0123	multicopper oxidase (laccase)	234	285	238	360693	342500	332177	6	222	317	281	230	466248	344520	350165	7	249	0.25930953456532907	1.0
	901534	900866		-	artM	b0861	arginine transporter subunit	7	11	15	11014	13250	20980	0	22	8	7	7	11996	9444	12133	0	16	0.2593736342199616	1.0
	1951395	1952213		+	yecE	b1868	UPF0759 family protein	33	48	37	52145	57567	52852	1	66	32	41	26	48292	51248	40666	1	57	0.2595396830918252	1.0
	4607803	4608216		+	holD	b4372	DNA polymerase III, psi subunit	5	12	6	8539	14448	8397	0	25	11	6	10	17341	8093	16085	0	33	0.26004506905812375	1.0
	702751	701603		-	nagA	b0677	N-acetylglucosamine-6-phosphate deacetylase	85	98	71	131052	117503	99578	2	100	88	106	93	130157	129883	142158	3	116	0.26044520605084714	1.0
	1536617	1535937		-	narV	b1465	nitrate reductase 2 (NRZ), gamma subunit	8	6	7	13376	8207	9957	0	15	5	8	3	7581	10180	5600	0	11	0.2604655049910778	1.0
	3843964	3845730		+	ade	b3665	cryptic adenine deaminase	169	242	186	260711	289921	260399	4	152	210	260	197	309289	318507	299057	5	174	0.26058452221572437	1.0
	3908366	3907593		-	pstB	b3725	phosphate transporter subunit	15	11	15	24312	13223	21245	0	25	13	25	15	19108	30668	24084	0	31	0.26067150845192355	1.0
	2991268	2991759		+	ygeG	b2851	SycD-like chaperone family TPR-repeat-containing protein	6	2	0	10728	3321	1205	0	10	4	7	4	6531	9366	6106	0	14	0.26068736241518936	1.0
	4406654	4409095		+	rnr	b4179	exoribonuclease R, RNase R	96	104	106	147871	125255	148526	1	57	149	125	101	219894	153547	153846	2	71	0.26105985952887595	1.0
	1862429	1862016		-	msrB	b1778	methionine sulfoxide reductase B	8	20	11	12753	24608	15556	1	42	20	16	11	29422	19957	17402	1	53	0.2611067691355795	1.0
1764780			1764713	-	rydB	b4430	-	5	4	3	8626	5036	5383	2	93	3	4	2	5020	5221	3192	1	65	0.2611829870900061	1.0
	4196903	4197676		+	nudC	b3996	NADH pyrophosphatase	82	160	98	126639	192452	137437	5	196	113	182	114	166256	223020	173988	7	242	0.2616793104885198	1.0
	3474081	3473542		-	rpsG	b3341	30S ribosomal subunit protein S7	32	50	54	50216	60310	76310	3	115	50	62	51	74573	76561	77512	4	141	0.2617578224863172	1.0
	1870385	1871860		+	yeaI	b1785	putative membrane-anchored diguanylate cyclase	10	6	8	16767	8180	11675	0	8	9	13	11	13396	16016	18161	0	10	0.2620515400430219	1.0
	981047	982894		+	ldtD	b0925	murein L,D-transpeptidase	44	76	58	68809	91704	82231	1	43	64	91	54	95346	111418	83417	1	52	0.26209383452528684	1.0
	1842135	1841863		-	ynjH	b1760	DUF1496 family protein	50	50	56	77054	60602	78441	7	263	42	61	30	62158	75733	46458	6	225	0.2623388332788011	1.0
	3144164	3142986		-	hybB	b2995	putative hydrogenase 2 cytochrome b type component	2	16	10	4585	19552	14664	0	10	6	23	8	9409	28312	12255	0	14	0.26246888859225026	1.0
	2922100	2920748		-	gudP	b2789	putative D-glucarate transporter	20	26	19	32003	31155	27058	0	22	26	19	31	38806	24386	47156	0	27	0.2625415167070789	1.0
	3452286	3451681		-	rplD	b3319	50S ribosomal subunit protein L4	40	65	55	62874	78188	77920	3	120	69	64	57	101425	78783	87133	4	147	0.26262415104639386	1.0
3516035			3516214	+	-	predicted RNA	antisense: damX	2431	2809	2420	3743943	3365019	3377499	526	19419	2545	2590	2189	3738387	3170024	3322993	548	18947	0.2630097951870222	1.0
3377810			3378795	+	-	predicted RNA	antisense: rpsI rplM	224148	225969	199699	345202422	270659439	278665898	8159	302409	204374	228964	166662	300140061	280232005	252959481	8206	281721	0.26329795720477567	1.0
	865129	864380		-	moeB	b0826	molybdopterin synthase sulfurylase	11	11	7	17546	13597	10511	0	18	9	15	12	14216	19285	19591	0	23	0.2634151717027216	1.0
2755953			2755603	-	-	predicted RNA	antisense: ssrA	162876	186574	154825	250839980	223472682	216047122	17782	655612	128444	177778	97260	188630771	217584839	147622060	15500	525961	0.2634434005079352	1.0
	4419625	4418561		-	ulaG	b4192	L-ascorbate 6-phosphate lactonase	28	33	29	43822	40622	41020	1	39	18	36	19	26622	45150	30259	0	31	0.263904291673779	1.0
	246502	246242		-	dinJ	b0226	antitoxin of YafQ-DinJ toxin-antitoxin system	2	5	5	4317	6927	6985	0	23	6	6	6	8837	7619	9185	0	32	0.26390899274949686	1.0
	2239289	2237769		-	mglA	b2149	fused methyl-galactoside transporter subunits of ABC superfamily: ATP-binding components	146	155	128	225558	185810	178796	3	129	185	187	137	271917	229487	208077	4	155	0.26391971865307373	1.0
	4356411	4354954		-	dtpC	b4130	dipeptide and tripeptide permease	54	62	48	83318	75221	67773	1	51	40	57	42	58802	70916	63939	1	44	0.2640875435501864	1.0
	1209119	1208517		-	tfaE	b1156	e14 prophage; putative tail fiber assembly protein	5	3	7	8652	3974	10486	0	12	6	8	7	10160	10336	11357	0	17	0.2642151617128588	1.0
	558212	558754		+	sfmA	b0530	FimA homolog, function unknown	0	2	0	1514	2504	0	0	2	0	3	0	0	4266	1474	0	3	0.26533050069369374	1.0
	3913668	3911839		-	glmS	b3729	L-glutamine:D-fructose-6-phosphate aminotransferase	75	88	91	116222	105696	128354	1	63	81	116	94	120167	143176	143065	2	74	0.2655958141552636	1.0
	4638178	4639530		+	creD	b4400	inner membrane protein	179	228	202	275860	273792	282288	5	204	232	224	216	341145	274241	329064	6	232	0.2656258110460565	1.0
	1056261	1057289		+	torT	b0994	periplasmic sensory protein associated with the TorRS two-component regulatory system	57	53	51	89089	63828	72141	1	72	43	44	49	63276	54432	74973	1	62	0.2662148425009642	1.0
	3192864	3194525		+	yqiK	b3051	PHB family membrane protein, function unknown	213	327	227	328897	392037	317595	5	208	217	218	201	319304	267640	306053	5	179	0.2662582902230074	1.0
	4262840	4263082		+	pspG	b4050	phage shock protein G	7	6	5	11861	8316	8256	1	39	6	8	11	9477	10442	17986	1	51	0.2663000665141187	1.0
	1103196	1102546		-	csgD	b1040	csgBAC operon transcriptional regulator	2	2	5	3893	3014	8306	0	7	1	3	2	1946	4754	4012	0	5	0.2663357804527468	1.0
	1247376	1245679		-	treA	b1197	periplasmic trehalase	27	33	22	43026	39642	31904	0	22	24	39	35	36449	48256	53384	0	27	0.26644901360146106	1.0
	3759861	3758017		-	selB	b3590	selenocysteinyl-tRNA-specific translation factor	6	6	10	10131	7771	14779	0	5	4	5	7	6062	6947	11366	0	4	0.2668501191824395	1.0
	3866273	3864612		-	yidE	b3685	putative transporter	47	75	57	73222	90295	79919	1	48	44	71	37	64728	87102	56838	1	41	0.2669943154583433	1.0
	4608185	4608631		+	rimI	b4373	ribosomal-protein-S18-alanine N-acetyltransferase	7	7	10	12017	9207	14482	0	26	9	3	6	13516	3933	9228	0	19	0.2676739436192732	1.0
	3920888	3920418		-	atpF	b3736	F0 sector of membrane-bound ATP synthase, subunit b	46	59	49	72183	70681	68598	4	149	40	44	43	59887	54283	66503	3	127	0.26792430516751403	1.0
	3597984	3598367		+	panM	b3459	PanD autocleavage accelerator, panothenate synthesis	40	72	74	61680	87253	103971	6	219	49	58	47	72754	72111	72051	5	188	0.2682638250811658	1.0
	255977	256435		+	gpt	b0238	xanthine phosphoribosyltransferase; xanthine-guanine phosphoribosyltransferase	5	2	8	7838	3321	12327	0	17	9	3	8	14608	3968	13590	0	23	0.26960363396077847	1.0
	1592442	1592176		-	hipB	b1508	antitoxin of HipAB toxin-antitoxin system	11	22	13	16975	26663	18256	2	77	14	23	17	20850	29197	27093	2	96	0.2703716903923739	1.0
	3766337	3767179		+	yibA	b3594	HEAT-domain lethality reduction protein; putative immunity protein for putative polymorphic toxin RhsA	6	13	6	10728	15605	8372	0	13	5	4	8	7744	5864	12412	0	10	0.2704327579387297	1.0
	1982387	1981587		-	otsB	b1897	trehalose-6-phosphate phosphatase, biosynthetic	12	23	6	19371	27922	9264	0	23	10	14	6	15420	18280	9839	0	18	0.2716841758363669	1.0
	3653961	3654527		+	slp	b3506	outer membrane lipoprotein	15	24	12	24052	29386	17587	1	41	23	14	24	33777	17148	36461	1	51	0.2718659884532943	1.0
	3105714	3106970		+	nupG	b2964	nucleoside transporter	114	166	143	176752	198958	200313	4	152	92	136	107	135339	167520	162918	3	123	0.27190484055857617	1.0
	1184444	1183617		-	potB	b1125	polyamine transporter subunit	5	3	10	8600	3906	14490	0	10	8	10	7	12431	12713	10956	0	14	0.2720344137528859	1.0
2211201	2211225	2211686	2213357	+	yehR	b2123	lipoprotein, DUF1307 family	342	406	372	527989	486579	519635	30	1106	381	392	333	560382	480813	505983	32	1116	0.2720910862549635	1.0
696504			696430	-	glnX	b0664	Gln tRNA	0	1	1	579	1245	2179	0	17	0	0	1	204	332	1814	0	10	0.27212983448013617	1.0
	1454868	1455155		+	paaB	b1389	putative ring 1,2-phenylacetyl-CoA epoxidase subunit	2	1	3	3296	1708	4590	0	11	3	3	2	5865	3891	3811	0	15	0.2721511170130787	1.0
	2370908	2372560		+	arnT	b2257	4-amino-4-deoxy-L-arabinose transferase	42	72	56	65443	87171	78143	1	46	37	50	54	54653	61591	81995	1	39	0.27224546812664513	1.0
	3751992	3752966		+	yiaU	b3585	putative DNA-binding transcriptional regulator	8	12	15	12934	15251	21856	0	17	7	9	10	10459	11567	15858	0	12	0.2722661183600519	1.0
	1916128	1915631		-	msrC	b1832	free methionine-(R)-sulfoxide reductase	2	8	7	3382	10460	10238	0	16	6	8	8	9298	10399	13093	0	21	0.2726870144274592	1.0
4481406			4481696	+	-	predicted RNA	antisense: valS	3723	4379	4149	5734954	5245168	5789769	520	19209	3774	3894	3305	5542614	4766183	5016643	508	17554	0.2730162885510337	1.0
	2065222	2064479		-	cobS	b1992	cobalamin synthase	1	11	9	2171	13304	13665	0	13	10	11	5	15121	14446	9010	0	17	0.27314384759600185	1.0
	988985	987585		-	asnS	b0930	asparaginyl tRNA synthetase	82	110	89	126682	132101	125076	2	91	87	88	62	128517	108807	94827	2	79	0.27343523304060735	1.0
	1453927	1454856		+	paaA	b1388	ring 1,2-phenylacetyl-CoA epoxidase subunit	23	16	22	35637	19450	30872	0	30	16	20	12	24094	25588	19234	0	24	0.27351831275391936	1.0
	2523985	2522729		-	xapB	b2406	xanthosine transporter	18	15	15	27772	18143	21013	0	17	13	11	12	20227	13576	18292	0	13	0.2739393090597003	1.0
	1639334	1639080		-	rzoQ	b4689	putative Rz1-like lipoprotein, Qin prophage	12	43	25	18740	51796	35760	3	138	21	46	26	30993	56448	40893	4	167	0.27397873561280134	1.0
	539147	540508		+	allB	b0512	allantoinase	16	18	14	25757	21838	20551	0	16	9	22	7	14591	27442	11104	0	13	0.2743814610904361	1.0
3423655			3423580	-	thrV	b3273	Thr tRNA	2	3	4	3287	4654	6275	1	62	6	4	3	9084	5914	5303	2	89	0.2747800192196756	1.0
	2225631	2225044		-	yohC	b2135	Yip1 family inner membrane protein	6	10	9	10564	12631	13079	0	20	10	17	6	15573	20877	10415	0	26	0.27508651023489983	1.0
	4602858	4602088		-	yjjP	b4364	DUF1212 family inner membrane protein	4	9	8	6999	11303	11815	0	13	8	4	2	13037	5008	4439	0	9	0.2751211371206173	1.0
	3019161	3020489		+	ssnA	b2879	putative chlorohydrolase/aminohydrolase	16	28	21	25852	34531	30170	0	22	18	23	11	26596	28666	17855	0	18	0.2751726147615243	1.0
	4494406	4493375		-	idnD	b4267	L-idonate 5-dehydrogenase, NAD-binding	7	12	5	11792	14400	7216	0	10	5	7	5	7351	8942	8775	0	8	0.2756583064964642	1.0
	745935	746726		+	nei	b0714	endonuclease VIII/ 5-formyluracil/5-hydroxymethyluracil DNA glycosylase	23	36	41	36926	43146	57517	1	57	29	30	22	42640	37530	33906	1	48	0.2761157261537742	1.0
	304182	303853		-	ykgJ	b0288	UPF0153 cysteine cluster protein	35	39	36	53988	47488	50276	4	153	46	39	38	68946	47881	58182	5	176	0.27620287337424376	1.0
3830240			3830221	-	-	predicted RNA	antisense: xanP	214	247	237	330610	296522	331269	432	15973	192	226	176	283427	277219	268161	402	13813	0.27644743623769436	1.0
	2001024	2000473		-	fliZ	b1921	RpoS antagonist; putative regulator of FliA activity	34	37	27	53633	44957	38279	2	82	26	30	24	38311	37757	37299	1	68	0.27649361091701563	1.0
	960264	961028		+	ycaL	b0909	putative peptidase-related chaperone	10	22	15	16231	26813	21476	0	28	17	23	16	25409	29013	25462	1	34	0.2771896586592708	1.0
	2905418	2904747		-	queE	b2777	7-carboxy-7-deazaguanine synthase; queosine biosynthesis	12	15	11	18671	18803	15688	0	26	17	20	10	25623	25390	15561	0	33	0.27727281310070045	1.0
	4324352	4323336		-	phnD	b4105	phosphonate ABC transporter periplasmic binding protein	12	8	14	18999	10541	20642	0	16	12	5	8	18049	7018	13058	0	12	0.2773896979737926	1.0
	3852988	3852890		-	ivbL	b3672	ilvB operon leader peptide	2	1	1	4360	2279	2328	0	30	2	2	4	3372	2681	6638	1	42	0.27774588287194274	1.0
	3086706	3087860		+	metK	b2942	S-adenosylmethionine synthetase	65	92	75	100311	111086	105796	2	91	88	96	59	129627	118153	90605	2	97	0.2782897450590992	1.0
	3888730	3890145		+	tnaA	b3708	tryptophanase/L-cysteine desulfhydrase, PLP-dependent	6	4	7	9240	5852	10998	0	6	3	11	10	5353	14354	15195	0	8	0.2784131777487128	1.0
	2003872	2005278		+	fliD	b1924	flagellar filament capping protein	12	13	5	18740	16578	7480	0	10	14	13	10	21209	17085	15710	0	12	0.2785325591880203	1.0
1645897	1645897	1646202	1646202	+	ydfV	b1565	Qin prophage; uncharacterized protein	69	77	86	106800	92262	121195	9	348	78	94	72	115753	116186	110554	10	373	0.27908345535680934	1.0
	3886828	3888192		+	mnmE	b3706	tRNA U34 5-methylaminomethyl-2-thiouridine modification GTPase	33	35	25	52137	42690	35868	0	31	31	48	30	46951	59816	46632	1	37	0.27914713537169145	1.0
	3828945	3830336		+	xanP	b3654	xanthine permease	65	70	73	101540	85007	103005	1	69	58	69	54	85356	84626	83138	1	60	0.279601902856405	1.0
	2747795	2746434		-	ffh	b2610	Signal Recognition Particle (SRP) component with 4.5S RNA (ffs)	11	11	10	18454	14318	14846	0	11	4	14	7	6591	17877	11453	0	8	0.2798528659262638	1.0
60346	60346	59687	59332	-	rluA	b0058	dual specificity 23S rRNA pseudouridine(746), tRNA pseudouridine(32) synthase, SAM-dependent	167	234	206	257189	280311	287606	11	416	218	252	200	320927	309020	304788	13	472	0.2801264076381306	1.0
3923680	3923680	3923057	3923034	-	rsmG	b3740	16S rRNA m(7)G527 methyltransferase, SAM-dependent; glucose-inhibited cell-division protein	234	229	214	361662	274819	299702	13	500	237	269	240	348377	330017	365064	16	557	0.2804544522045483	1.0
	2879772	2878855		-	ygbT	b2755	multifunctional endonuclease Cas1, CRISPR adaptation protein; DNA repair enzyme	3	2	3	5554	3457	5507	0	5	3	6	4	5532	8404	6751	0	7	0.2806396545558239	1.0
2035835	2035835	2036686		+	hchA	b1967	glyoxalase III and Hsp31 molecular chaperone	180	212	185	277928	254273	259441	8	309	146	179	150	214540	220169	228079	7	259	0.28079867987201274	1.0
	2328143	2327367		-	yfaP	b2225	DUF2135 family protein, putative host defense protein	11	11	10	17503	14189	14482	0	19	11	22	9	16495	27095	14340	0	24	0.281558653229663	1.0
	2377592	2376834		-	menH	b2263	2-succinyl-6-hydroxy-2,4-cyclohexadiene-1-carboxylate synthase	1	5	3	2958	6199	4615	0	6	1	4	1	2552	4945	2198	0	4	0.2817927160053105	1.0
1291457	1291457	1292365	1292949	+	galU	b1236	glucose-1-phosphate uridylyltransferase	222	299	257	342317	358881	359796	10	389	267	318	264	392119	390123	400837	12	433	0.2818802261867645	1.0
	1879948	1879589		-	yeaR	b1797	DUF1971 family protein, nitrate-inducible	7	12	7	11195	15482	10420	0	34	7	9	3	11031	11496	5364	0	25	0.28189621940817605	1.0
	3449883	3449182		-	rpsC	b3314	30S ribosomal subunit protein S3	59	89	103	91140	107200	144818	4	162	59	85	77	87406	104442	116913	4	146	0.28236598750650166	1.0
	1234717	1233176		-	nhaB	b1186	sodium:proton antiporter	64	84	79	98901	101279	110742	1	67	68	95	75	100000	116299	115073	2	71	0.28256516422630557	1.0
	4376317	4376442		+	ecnA	b4410	entericidin A membrane lipoprotein, antidote entericidin B	7	9	5	11723	11004	8075	2	81	5	8	3	7675	10081	5355	1	61	0.2825843052515735	1.0
	3502340	3503170		+	frlC	b4474	fructoselysine 3-epimerase	7	10	9	11550	12059	12889	0	14	11	11	10	16880	13484	16564	0	18	0.28261644937987795	1.0
	1285139	1285849		+	narJ	b1226	molybdenum-cofactor-assembly chaperone subunit (delta subunit) of nitrate reductase 1	2	11	9	4334	14284	12963	0	14	11	10	7	17426	12833	10973	0	19	0.28318282550914325	1.0
	1315770	1315270		-	yciF	b1258	putative rubrerythrin/ferritin-like metal-binding protein	4	5	5	6990	6090	7596	0	13	3	4	3	4653	5680	4614	0	9	0.28344630667283904	1.0
	1912576	1911695		-	htpX	b1829	putative endopeptidase	7	35	18	10875	42126	25423	0	29	22	25	20	33213	31001	31280	1	36	0.28351212632893963	1.0
	170575	171465		+	fhuD	b0152	iron-hydroxamate transporter subunit	3	4	3	5796	4879	4987	0	5	3	5	0	4755	6395	0	0	4	0.284122261063219	1.0
	3324070	3322733		-	glmM	b3176	phosphoglucosamine mutase	15	20	14	23611	24744	19734	0	16	15	19	24	22207	24244	37194	0	20	0.28457415427066124	1.0
	1624497	1624105		-	ydeI	b1536	hydrogen peroxide resistance OB fold protein; putative periplasmic protein	3	5	3	4724	6390	5383	0	13	1	4	2	1818	5631	4282	0	9	0.2846668356265146	1.0
	4253016	4253888		+	ubiA	b4040	p-hydroxybenzoate octaprenyltransferase	39	81	72	60477	97692	101288	2	99	43	60	56	64463	74043	85685	2	85	0.2847302455913753	1.0
	4513409	4512411		-	fecC	b4289	iron-dicitrate transporter subunit	9	18	8	14215	22607	12145	0	16	11	19	13	16171	24223	20812	0	20	0.2851203997191086	1.0
1492119			1492174	+	sokB	b4429	-	8	5	6	13410	6880	8463	4	171	6	6	2	9434	8199	3890	3	128	0.28566548797320473	1.0
	587981	587091		-	ybcH	b0567	PRK09936 family protein	21	22	22	33846	27262	32020	0	34	30	30	20	44501	36922	31202	1	42	0.2859092314214328	1.0
	1028721	1028404		-	hspQ	b0966	heat shock protein involved in degradation of mutant DnaA; hemimethylated oriC DNA-binding protein	83	61	66	128785	73975	92651	8	309	60	81	46	88405	99681	71083	7	271	0.2859733602765567	1.0
	2797211	2797510		+	ygaV	b2667	tributyltin-inducible repressor of ygaVP	12	15	14	18999	18613	20237	1	64	9	5	15	14139	7315	23473	1	49	0.28597746736693547	1.0
	2734173	2731600		-	clpB	b2592	protein disaggregation chaperone	22	28	17	34642	34510	24448	0	12	30	25	23	45192	31680	36270	0	14	0.28603507983638216	1.0
	1266924	1267316		+	ychQ	b1213	SIRB family inner membrane protein	6	8	13	9655	10487	19387	0	33	6	10	5	8845	13137	7841	0	25	0.2863242676062774	1.0
	1131854	1132549		+	flgD	b1075	flagellar hook assembly protein	8	18	11	12779	22335	16142	0	24	16	14	14	24692	17920	21353	0	30	0.28637864972100513	1.0
	3420134	3421315		+	yhdX	b3269	putative amino-acid transporter subunit	95	200	120	147577	239859	168070	4	156	148	230	107	217733	282716	162622	5	186	0.28648391382852634	1.0
	1318415	1317222		-	trpB	b1261	tryptophan synthase, beta subunit	18	25	28	29252	30563	39790	0	27	38	29	17	56241	36561	27241	0	33	0.28659762459649935	1.0
1991901			1991815	-	leuZ	b1909	Leu tRNA	1	2	1	2431	2531	1725	0	25	1	1	0	2313	1351	549	0	16	0.2873214299643696	1.0
2337186			2337508	+	-	predicted RNA	antisense: gyrA	3943	4190	3991	6072503	5018994	5569300	464	17193	3804	3826	3071	5587406	4682801	4662247	446	15410	0.287488278345946	1.0
	2224870	2223938		-	pbpG	b2134	D-alanyl-D-alanine endopeptidase	52	69	70	80308	83054	97679	2	93	59	53	48	86791	65058	74031	2	80	0.2875474104819643	1.0
	3298846	3298211		-	yraR	b3152	putative nucleoside-diphosphate-sugar epimerase	19	20	20	29287	24370	29023	1	43	23	27	21	34725	33272	32362	1	52	0.2876827384247673	1.0
	3721198	3722049		+	insK	b3558	IS150 transposase B	46	54	38	71569	64767	53835	2	74	37	49	31	55455	60834	47723	1	64	0.2877877834089233	1.0
	1003947	1004657	1004657	+	ycbF	b0944	putative periplasmic pilin chaperone	112	168	111	173334	201898	155924	6	249	146	198	116	215351	242872	176404	8	297	0.28793481197689585	1.0
3581016			3580927	-	ryhB	b4451	-	2	1	0	4248	2293	611	0	26	2	4	0	3475	5688	889	1	37	0.28805488952086694	1.0
	4382318	4380510		-	frdA	b4154	fumarate reductase (anaerobic) catalytic and NAD/flavoprotein subunit	59	64	47	92351	77848	65964	1	43	58	61	28	85203	75493	43457	1	37	0.28807109210746695	1.0
	3000345	3002603		+	xdhA	b2866	xanthine dehydrogenase, molybdenum binding subunit	69	100	81	107103	120838	114193	1	50	89	99	86	131540	121450	130643	1	56	0.28822288153232073	1.0
	1148759	1149712		+	fabH	b1091	3-oxoacyl-[acyl-carrier-protein] synthase III	7	4	4	11204	5056	6440	0	7	7	5	8	10911	6706	13293	0	10	0.28846272157618363	1.0
	190857	191708		+	tsf	b0170	translation elongation factor EF-Ts	26	43	29	40699	51789	41532	1	52	33	52	28	48983	64428	42602	1	61	0.2885185371729418	1.0
	1339330	1340094		+	pgpB	b1278	phosphatidylglycerophosphatase B	23	31	32	36442	37409	44719	1	51	23	28	18	34520	34375	27991	1	42	0.28868912374356537	1.0
	93166	94653		+	murE	b0085	UDP-N-acetylmuramoyl-L-alanyl-D-glutamate:meso-diaminopimelate ligase	5	8	15	8210	9963	21046	0	8	11	12	11	17238	15217	17315	0	11	0.288804781144211	1.0
	1556625	1557056		+	osmC	b1482	lipoyl-dependent Cys-based peroxidase, hydroperoxide resistance; salt-shock inducible membrane protein; peroxiredoxin	6	7	3	10425	8438	5383	0	18	7	8	6	11501	10753	10441	0	25	0.28896119273078913	1.0
	2829047	2829820		+	srlR	b2707	sorbitol-inducible srl operon transcriptional repressor	18	29	17	29243	35089	24333	1	38	10	26	15	15138	32706	24049	0	30	0.2892056256418054	1.0
	3976278	3977528		+	wzxE	b3792	O-antigen translocase	9	16	16	14448	19647	23375	0	15	18	18	13	27706	23035	20577	0	19	0.2901788953402236	1.0
	85630	87354		+	ilvI	b0077	acetolactate synthase 3 large subunit	24	47	30	37843	57050	41986	0	26	23	27	30	33879	33540	46606	0	22	0.29036497397455163	1.0
	2455646	2455083		-	yfcV	b2339	putative fimbrial-like adhesin protein	1	4	2	2448	5369	3600	0	6	3	4	3	5233	5610	4989	0	9	0.29042600867083196	1.0
	2118404	2117124		-	wcaK	b2045	colanic acid biosynthesis protein	14	13	13	21820	16244	18495	0	14	13	19	18	19219	23268	27747	0	18	0.29066931565041776	1.0
	4604160	4604837	4604837	+	bglJ	b4366	bgl operon transcriptional activator	1527	1646	1658	2352336	1972213	2313772	88	3263	1292	1478	1408	1897839	1809437	2137168	83	2873	0.29076710978284526	1.0
	1099640	1100194		+	ycdY	b1035	redox enzyme maturation protein (REMP) chaperone for YcdX	46	96	72	70929	116088	101618	4	173	52	91	84	77100	111453	127913	5	190	0.2908895515549765	1.0
	3078859	3077471		-	cmtA	b2933	putative mannitol-specific PTS enzymes: IIB component/IIC component	4	13	9	6489	15591	13112	0	8	12	10	8	18698	13081	13503	0	10	0.29183720396286905	1.0
2389116	2389116	2389964	2405453	+	yfbP	b2275	TPR-like repeats-containing protein	490	461	512	755606	552694	715126	21	794	401	409	392	589702	501344	595760	19	662	0.2918683705045126	1.0
	765984	767960		+	mngA	b0731	fused 2-O-a-mannosyl-D-glycerate specific PTS enzymes: IIA component/IIB component/IIC component	13	12	8	21465	14978	11815	0	8	8	10	7	13165	12430	11139	0	6	0.2920868735761424	1.0
	1656184	1656744		+	speG	b1584	spermidine N1-acetyltransferase	76	76	76	117909	92044	106820	5	188	60	75	66	88609	92812	101352	4	168	0.29241777805441294	1.0
	2237753	2236743		-	mglC	b2148	methyl-galactoside transporter subunit	18	22	15	28612	26834	21996	0	25	11	12	19	16290	15634	29823	0	20	0.2927568766899074	1.0
	1617028	1618218		+	ydeA	b1528	arabinose efflux transporter, arabinose-inducible	59	59	55	91503	70899	77103	1	67	51	58	39	75580	71623	60162	1	58	0.292996381599622	1.0
	3138727	3139593		+	yghU	b2989	putative S-transferase	56	51	51	86572	62168	72289	2	84	45	38	50	67375	46855	76770	2	73	0.2930633645227319	1.0
	646580	645117		-	citT	b0612	citrate:succinate antiporter	38	64	52	59058	77126	73437	1	47	37	54	38	54730	67067	58906	1	41	0.29323945290906617	1.0
	2867551	2866559		-	rpoS	b2741	RNA polymerase, sigma S (sigma 38) factor	19	32	29	29390	38614	40657	0	36	28	28	34	42426	34828	52826	1	43	0.29351397154000447	1.0
1344994	1346796	1346900	1349131	+	ymiB	b4672	uncharacterized protein	40	40	27	61680	48917	38246	12	472	31	31	27	45935	38372	42105	11	401	0.2935367582911895	1.0
4278066			4277927	-	ryjA	b4459	-	24	17	21	37298	21498	29914	5	211	17	17	16	25973	21004	25104	4	171	0.2935580640317681	1.0
	3630602	3629535		-	yhiI	b3487	putative membrane fusion protein (MFP) of efflux pump	8	8	4	12709	9582	6853	0	9	10	10	6	15070	13385	9691	0	11	0.29359957447226925	1.0
	2465301	2466233		+	yfdC	b2347	putative inner membrane protein	53	77	51	83024	93065	72421	2	88	53	79	77	77851	97113	117210	3	104	0.293705911817679	1.0
	1169073	1169330		+	bhsA	b1112	biofilm, cell surface and signaling protein	17	27	31	26622	33074	43910	3	133	17	23	19	25947	28645	30102	3	109	0.2938947668780095	1.0
	2819146	2818961		-	csrA	b2696	pleiotropic regulatory protein for carbon source metabolism	7	3	4	11636	4158	6027	1	39	6	11	4	9144	13576	6987	1	53	0.29391777225503335	1.0
	1995359	1994703		-	uvrY	b1914	response regulator in two-component regulatory system with BarA	10	35	22	15435	42765	31442	1	45	18	15	17	27441	19228	26264	1	37	0.29407871985508616	1.0
	11786	11382		-	yaaI	b0013	UPF0412 family protein	29	40	23	45959	48434	32334	2	104	36	41	30	53304	50222	45586	3	122	0.2942154225072441	1.0
	2476310	2476510		+	torI	b4501	response regulator inhibitor for tor operon	10	14	15	16335	17503	21748	2	92	15	16	17	23113	19738	26099	3	114	0.29475095052455613	1.0
	3558268	3559866		+	rtcR	b3422	sigma 54-dependent transcriptional regulator of rtcBA expression	312	304	274	481129	365149	383230	6	256	229	311	227	337149	381804	344801	6	221	0.2952984614342119	1.0
	2625115	2626656		+	ppx	b2502	exopolyphosphatase	29	37	25	44791	44684	35868	0	27	27	42	35	40838	52373	54605	0	31	0.29544741902445193	1.0
	2965155	2964361		-	thyA	b2827	thymidylate synthetase	75	80	82	116681	96025	115407	3	137	71	112	72	105635	137601	110502	4	148	0.2954954455261166	1.0
	957653	958741		+	serC	b0907	3-phosphoserine/phosphohydroxythreonine aminotransferase	10	20	16	16084	24744	22681	0	19	16	17	21	23890	21655	32588	0	23	0.29554465680907643	1.0
	2356904	2357803		+	yfaD	b2244	transposase_31 family protein	10	20	18	15867	25017	25959	0	24	16	26	16	24854	32055	24956	0	30	0.2958860044522688	1.0
1741413	1741413	1742561	1743422	+	cfa	b1661	cyclopropane fatty acyl phospholipid synthase (unsaturated-phospholipid methyltransferase)	346	405	339	533249	485456	473156	11	432	366	395	338	537542	483905	513354	12	445	0.2959888699480511	1.0
	3053518	3052340		-	ubiH	b2907	2-octaprenyl-6-methoxyphenol hydroxylase, FAD/NAD(P)-binding	5	11	10	7847	13297	14590	0	10	10	18	5	14779	22447	8557	0	12	0.29600813392980185	1.0
	824497	823736		-	ybhP	b0790	endo/exonuclease/phosphatase family protein	9	9	3	13877	11542	4219	0	12	10	12	5	15556	14835	8278	0	16	0.2961581781235313	1.0
	2214644	2212959		-	yehU	b2126	inner membrane putative sensory kinase in two-component system with YehT	19	32	25	29858	39247	35290	0	20	26	35	27	38900	43784	42402	0	24	0.29645538967789103	1.0
	1447519	1449018		+	feaB	b1385	phenylacetaldehyde dehydrogenase	8	14	14	12891	17932	19742	0	11	14	14	15	20952	17990	23883	0	13	0.2964798166346765	1.0
	334433	333501		-	yahB	b0316	putative DNA-bindng transcriptional regulator	90	114	104	139877	137280	145380	4	150	117	165	95	172284	203134	145516	5	186	0.29657436664597076	1.0
	715412	715906		+	ybfP	b0689	lipoprotein	17	22	16	26189	27113	22979	1	51	20	24	21	29610	29515	33382	1	62	0.29673430025702335	1.0
	800759	801811		+	ybhH	b0769	putative PrpF family isomerase	3	1	3	5061	2273	5540	0	4	1	1	3	1673	1499	5879	0	2	0.29734005012903186	1.0
	1039296	1040432		+	cbdB	b0979	cytochrome bd-II oxidase, subunit II	11	29	18	18402	34735	25340	0	23	16	18	9	24812	23211	14802	0	18	0.2976997212322616	1.0
	3141286	3140792		-	hybD	b2993	maturation protease for hydrogenase 2	3	3	9	6125	3988	13252	0	15	5	3	3	8068	4287	4937	0	11	0.29776179103119194	1.0
	4512414	4511458		-	fecD	b4288	iron-dicitrate transporter subunit	11	16	14	16957	19633	20460	0	19	9	14	8	13968	18103	12465	0	15	0.29808217030428574	1.0
1789613	1789613	1789804	1791245	+	ydiE	b1705	hemin uptake protein HemP homolog	362	424	332	558357	508840	464007	72	2658	389	431	292	572122	528178	443998	78	2681	0.2982552567227096	1.0
	4421393	4421698		+	ulaB	b4194	L-ascorbate-specific enzyme IIB component of PTS	6	4	5	10763	5512	7340	0	25	7	9	6	10288	11970	9577	1	34	0.29836850596841946	1.0
	3262418	3260124		-	tdcE	b3114	pyruvate formate-lyase 4/2-ketobutyrate formate-lyase	16	23	25	25635	27671	35554	0	12	21	17	12	30917	21874	19574	0	10	0.29859579889563626	1.0
	4551636	4552820		+	uxuA	b4322	mannonate hydrolase	38	32	38	59612	39410	54116	1	43	34	43	18	50913	53017	27346	1	36	0.2988687851299966	1.0
	4478311	4477307		-	argI	b4254	ornithine carbamoyltransferase 1	27	37	31	42758	45127	43984	1	43	34	41	34	50213	50880	52547	1	50	0.29903501175167113	1.0
	1365550	1366815		+	puuE	b1302	4-aminobutyrate aminotransferase, PLP-dependent	46	69	68	71664	83591	94897	1	65	39	70	48	57735	86062	73124	1	57	0.2994447578246018	1.0
	2822011	2819381		-	alaS	b2697	alanyl-tRNA synthetase	34	38	28	52474	46127	39971	0	17	32	51	32	48437	62589	48813	0	20	0.2994546676086405	1.0
	4200566	4201261		+	yjaH	b4001	DUF1481 family putative lipoprotein	73	73	52	113903	87838	73610	3	131	68	96	59	100469	117877	90186	4	147	0.2996303225052496	1.0
	1834116	1834793		+	ydjY	b1751	putative ferrodoxin-like lipoprotein	7	3	5	10884	3620	8248	0	11	5	0	5	7590	714	8504	0	8	0.29964230012811954	1.0
	2871780	2871301		-	ispF	b2746	2C-methyl-D-erythritol 2,4-cyclodiphosphate synthase	13	22	10	20462	26711	14945	1	43	19	14	19	28551	17601	30268	1	53	0.2997080279251053	1.0
	2028017	2026323		-	yedQ	b1956	putative membrane-anchored diguanylate cyclase	238	372	295	366949	446229	412311	6	241	341	353	289	502245	432175	438878	7	270	0.29995669748544984	1.0
	1179631	1180359		+	cobB	b1120	deacetylase of acs and cheY, chemotaxis regulator	24	35	22	37800	42323	31483	1	51	30	41	24	44544	51107	37438	1	60	0.2999837439798654	1.0
	866568	867533		+	iaaA	b0828	Isoaspartyl peptidase	6	7	4	9733	9418	6712	0	8	8	9	7	12141	11163	10929	0	11	0.30007334070321195	1.0
	636569	635349		-	ybdN	b0602	PAPS reductase-like domain protein	21	32	24	32704	38941	33523	0	28	16	25	20	23710	31552	30914	0	23	0.3001662828185635	1.0
	3881221	3880148		-	recF	b3700	gap repair protein	72	92	82	111758	110446	114664	2	104	74	76	66	109955	94234	100724	2	94	0.3003240152678451	1.0
	2240348	2239350		-	mglB	b2150	methyl-galactoside transporter subunit	3	5	3	6151	6301	5292	0	5	8	6	2	12064	8199	4248	0	8	0.30064247391903154	1.0
	1376832	1377887		+	ycjS	b1315	putative NADH-binding oxidoreductase	8	16	13	13808	19763	18842	0	16	9	15	21	13234	19320	32379	0	20	0.30114947539501147	1.0
	1059256	1061802		+	torA	b0997	trimethylamine N-oxide (TMAO) reductase I, catalytic subunit	10	24	16	16360	29808	22516	0	8	13	13	11	20184	16215	17890	0	7	0.30118292199663144	1.0
4079751	4079751	4079969	4085970	+	yiiF	b3890	putative thymol sensitivity protein, CopG family putative transcriptional regulator	59	76	73	91391	92187	101882	11	434	73	80	71	107556	98471	108138	13	478	0.3013594918229518	1.0
	3307933	3307853		-	yrbN	b4685	uncharacterized protein	1	1	2	1704	1633	3583	0	28	2	3	1	3142	3947	2547	1	39	0.3014865384656263	1.0
	2644864	2644433		-	ndk	b2518	multifunctional nucleoside diphosphate kinase and apyrimidinic endonuclease and 3'-phosphodiesterase	2	1	0	3971	1878	239	0	4	0	2	2	939	3657	3916	0	6	0.3016893425497829	1.0
	2205695	2207974		+	yehM	b2120	uncharacterized protein	31	55	47	48788	66380	66782	0	26	26	53	35	39062	65178	54064	0	23	0.3024842839565249	1.0
	1628352	1629038		+	rspR	b1540	transcriptional repressor for rspAB	10	13	6	16265	16217	9586	0	20	7	10	5	11441	12515	8025	0	15	0.30274993975431047	1.0
	995988	994843		-	ssuD	b0935	alkanesulfonate monooxygenase, FMNH(2)-dependent	5	6	6	8020	7207	9173	0	7	4	3	4	6489	4478	7222	0	5	0.30301398440915284	1.0
	2204596	2205684		+	yehL	b2119	putative ABC superfamily transporter ATP-binding subunit	6	8	5	9240	9752	7992	0	8	7	4	2	10467	5765	4073	0	6	0.3030248675851804	1.0
	679406	678852		-	ybeT	b0647	Sel1 family TPR-like repeat protein	5	3	2	8383	3858	2898	0	9	7	3	4	10467	3947	6830	0	12	0.30355839091163983	1.0
	2708754	2707798		-	rseB	b2571	anti-sigma E factor, binds RseA	66	56	56	102370	67558	78441	2	86	46	46	59	68391	57438	89898	2	75	0.3037996145807898	1.0
	2168306	2167989		-	yegR	b2085	uncharacterized protein	0	0	0	960	809	264	0	2	0	0	2	85	0	3279	0	3	0.30423310676750986	1.0
	3411271	3411567		+	fis	b3261	global DNA-binding transcriptional dual regulator	5	5	12	8652	6431	17290	0	36	1	9	6	2715	12019	9935	0	27	0.3050673345238197	1.0
565978	565978	564815	564713	-	intD	b0537	DLP12 prophage; putative phage integrase	2173	3320	2586	3346573	3976834	3608595	85	3130	2570	3053	2672	3775093	3737064	4056106	96	3312	0.30510149504432604	1.0
	1637047	1637457		+	ydfO	b1549	Qin prophage; uncharacterized protein	5	6	4	7838	7349	6787	0	17	5	11	4	8247	14389	7109	0	24	0.30531641311004876	1.0
	620199	619384		-	fepC	b0588	iron-enterobactin transporter subunit	6	8	9	9370	10609	13153	0	13	12	11	6	18254	13781	10572	0	17	0.3054088185725827	1.0
	2477629	2476694		-	dsdC	b2364	dsd operon activator; autorepressor	21	53	19	33708	64556	26835	1	44	25	26	22	36979	31835	34630	1	36	0.30614279821568413	1.0
	2059690	2058203		-	yeeO	b1985	putative multdrug exporter, MATE family	32	41	24	50372	49666	34563	0	30	27	22	30	39899	27081	45542	0	25	0.30650435092099926	1.0
	1517648	1517881		+	ydcY	b1446	uncharacterized protein	32	43	37	49844	52048	52448	5	219	38	48	39	57214	59533	59944	7	251	0.3073789568271149	1.0
3081417			3081619	+	-	predicted RNA	antisense: tktA	2516	2457	2567	3875540	2943432	3582586	459	17079	2167	2348	1957	3183051	2874594	2971144	430	14825	0.3076645530582508	1.0
	3238580	3239545		+	alx	b3088	putative membrane-bound redox modulator	13	36	24	20487	43228	33861	0	33	15	24	17	22540	30562	27110	0	27	0.30788006064224377	1.0
	1694263	1692890		-	uidB	b1616	glucuronide transporter	8	11	5	12934	14026	7976	0	8	15	8	7	23206	10590	10851	0	10	0.3081499897584301	1.0
3869309	3869309	3868062	3867619	-	yidR	b3689	DUF3748 family protein	354	414	413	545682	496583	576451	11	432	379	401	352	557163	491588	535223	12	423	0.30818916688368114	1.0
	1057954	1057262		-	torR	b0995	response regulator in two-component regulatory system with TorS	29	43	34	45959	52218	47783	1	70	29	42	46	43912	52515	70263	2	80	0.30879711884927885	1.0
	4539501	4538785		-	nanC	b4311	N-acetylnuraminic acid outer membrane channel protein	21	15	19	33033	19150	27817	0	37	22	25	21	32855	30802	32737	1	44	0.3088230838268955	1.0
	4073571	4072675		-	yihU	b3882	gamma-hydroxybutyrate dehydrogenase, NADH-dependent	24	23	25	37073	27630	34926	0	37	21	19	17	31275	23374	27285	0	30	0.3088466364201371	1.0
4231631	4231631	4231359	4230367	-	yjbD	b4023	DUF3811 family protein	153	164	165	236364	196515	231483	21	811	130	148	113	191111	181393	172147	19	665	0.3090507649931096	1.0
	219594	218887		-	tsaA	b0195	tRNA-Thr(GGU) m(6)t(6)A37 methyltransferase, SAM-dependent	15	22	11	23974	27371	16001	0	31	12	11	13	18852	13929	20568	0	25	0.30909631626775885	1.0
	2126222	2125743		-	wcaH	b2051	GDP-mannose mannosyl hydrolase	22	25	17	34815	30284	23969	1	61	7	23	21	11261	28277	33356	1	50	0.3091402051589881	1.0
	883673	884905		+	mdfA	b0842	multidrug efflux system protein	31	39	44	48131	46712	62042	1	42	26	39	32	38763	48510	48804	1	36	0.3098242536365729	1.0
	4019624	4020229		+	ubiJ	b3834	aerobic ubiquinone synthesis protein, SCP2 family protein	23	37	26	36719	44943	36710	1	65	21	40	38	32300	50116	57763	2	77	0.31002207176903185	1.0
	1704949	1705164		+	cnu	b1625	nucleoid-associated oriC-binding protein; H-NS and StpA stabilizing factor	3	1	1	6013	1878	2212	0	15	0	3	0	947	4761	1133	0	10	0.3105319747640055	1.0
	2000385	1999585		-	fliY	b1920	cystine transporter subunit	23	25	24	36537	30291	34406	1	42	15	25	19	22549	31248	29501	1	34	0.3106316198474896	1.0
	3219076	3217556		-	aer	b3072	fused signal transducer for aerotaxis sensory component/methyl accepting chemotaxis component	68	96	66	105104	115741	93460	1	68	59	82	60	87038	101436	92315	1	61	0.31080147724284923	1.0
	44180	45466		+	fixC	b0043	putative oxidoreductase	4	9	7	6549	11290	10684	0	7	5	8	2	8111	10385	3192	0	5	0.31094652641601317	1.0
	3268415	3269602		+	yhaC	b3121	pentapetide repeats-related protein	23	17	14	35447	20852	20361	0	21	11	17	15	16530	21429	23595	0	17	0.31099732387471773	1.0
	2381608	2382525		+	rbn	b2268	RNase BN, tRNA processing enzyme	46	50	34	72313	60249	47832	1	65	51	56	46	76178	69246	70594	2	78	0.3110967675523913	1.0
	3602747	3602079		-	ftsE	b3463	putative ABC superfamily transporter ATP-binding subunit	51	46	46	78664	55995	64495	2	99	59	62	51	87107	76059	77486	3	119	0.3111748074987609	1.0
444814			444690	-	-	predicted RNA	antisense: yajQ	1752	1533	1720	2698987	1836531	2401387	495	18498	1342	1655	1274	1971601	2025772	1933722	460	15816	0.3115611872579938	1.0
	2176321	2175059		-	gatZ	b2095	D-tagatose 1,6-bisphosphate aldolase 2, subunit	8	14	10	12666	17040	15135	0	11	6	14	4	9596	18203	6376	0	9	0.31164879076615787	1.0
	2973862	2972669		-	lplT	b2835	lysophospholipid transporter	155	182	157	238916	219157	220072	5	189	136	154	110	200307	188836	167821	4	155	0.31186059105515435	1.0
4457865	4457865	4457314	4455777	-	yjgA	b4234	ribosome-associated UPF0307 family protein	372	461	393	574095	553150	549062	27	1012	377	370	357	554030	453569	542332	27	935	0.31187975973548704	1.0
	3311168	3309033		-	pnp	b3164	polynucleotide phosphorylase/polyadenylase	32	50	59	50475	60323	83287	0	30	41	47	32	61261	57672	49459	0	26	0.3123114342843336	1.0
	1924591	1923719		-	yebZ	b1840	inner membrane protein	27	40	40	42836	48359	56238	1	56	25	29	34	38106	35493	52285	1	48	0.31255329416567157	1.0
	807281	805998		-	ybhC	b0772	acyl-CoA thioesterase, lipoprotein	27	31	42	42368	38008	59706	0	36	22	35	27	33555	43056	41756	0	30	0.3127850724672238	1.0
	1640057	1639524		-	rrrQ	b1554	Qin prophage; putative lysozyme	7	23	13	11706	28603	18949	1	36	11	14	7	16871	17771	12028	0	29	0.3128521384489606	1.0
	3925633	3923744		-	mnmG	b3741	5-methylaminomethyl-2-thiouridine modification at tRNA U34	73	90	74	112623	108826	104169	1	57	89	94	66	131378	115818	100575	1	61	0.3146136010561776	1.0
	1587734	1586820		-	ydeQ	b1502	putative fimbrial-like adhesin protein	0	2	3	1133	3586	5210	0	3	1	2	0	2689	3275	776	0	2	0.3147234234200231	1.0
	2846471	2844762		-	hycE	b2721	hydrogenase 3, large subunit	11	29	20	16992	35864	29064	0	15	20	20	28	29585	25221	43597	0	19	0.3152658458309471	1.0
	1151939	1153180		+	fabF	b1095	3-oxoacyl-[acyl-carrier-protein] synthase II	28	18	27	43960	21811	38791	0	28	29	41	19	43835	50923	29649	0	33	0.3155019674346871	1.0
	3442734	3442618		-	rpmJ	b3299	50S ribosomal subunit protein L36	11	17	9	17926	20920	13945	4	150	18	15	12	27433	18889	18640	5	185	0.31570336632322027	1.0
	1164095	1165120		+	nagZ	b1107	beta N-acetyl-glucosaminidase	15	16	24	23187	19926	34481	0	25	14	28	24	21909	34807	36618	0	30	0.31609147184125813	1.0
	970673	970855		+	ycaR	b0917	peroxide and acid resistance protein, UPF0434 family	6	5	7	9595	6165	10015	1	46	5	5	2	8401	6593	4483	1	35	0.3162030010985252	1.0
	3519064	3518543		-	aroK	b3390	shikimate kinase I	4	4	5	7432	4791	7043	0	12	8	6	3	12440	8277	5425	0	16	0.3164094069393377	1.0
	1116807	1117859		+	yceA	b1055	putative rhodanese-related sulfurtransferase	18	19	13	27790	23097	19197	0	22	12	30	18	18767	37580	28445	0	26	0.3168497021970533	1.0
	1550461	1551345		+	fdnH	b1475	formate dehydrogenase-N, Fe-S (beta) subunit, nitrate-inducible	2	10	15	3495	12807	21773	0	14	8	4	7	12047	5666	11488	0	10	0.3169546677365157	1.0
	1832428	1833234		+	xthA	b1749	exonuclease III	21	19	24	32471	23329	34794	1	37	22	30	24	33768	37629	37002	1	44	0.3172593196092201	1.0
	268005	267184		-	yafZ	b0252	CP4-6 prophage; conserved protein	65	100	85	101254	120688	118751	3	138	88	109	73	130566	134580	111243	4	152	0.3177380212392781	1.0
	4563603	4562743		-	yjiK	b4333	SdiA-regulated family putative membrane-anchored protein; putative phytase-like esterase	79	96	78	122676	116026	110040	3	135	96	114	75	141043	139582	113852	4	152	0.31777223598362947	1.0
	2968977	2968447		-	rppH	b2830	RNA pyrophosphohydrolase	8	9	5	12554	11215	8091	0	20	4	5	7	6565	6515	11366	0	15	0.3177954989909943	1.0
	2615881	2614820		-	yfgO	b2493	putative UPF0118 family inner membrane permease	9	16	14	14016	20328	20667	0	17	10	22	16	15420	27194	24947	0	21	0.317932560174624	1.0
	4577958	4576912		-	mcrC	b4345	5-methylcytosine-specific restriction enzyme McrBC, subunit McrC	6	8	5	9551	9609	7943	0	8	9	7	7	14216	9762	11331	0	11	0.31812104436502103	1.0
	1556280	1556065		-	bdm	b1481	biofilm-dependent modulation protein	2	0	2	4516	1163	2955	0	13	1	1	0	2757	2157	819	0	8	0.31815962583799146	1.0
	2381027	2380722		-	elaB	b2266	DUF883 family protein, putative membrane-anchored ribosome-binding protein	3	5	3	5935	6996	4879	0	19	4	4	1	6002	5136	1875	0	14	0.3181700855409103	1.0
3790081	3790081	3789047	3785206	-	waaH	b3615	LPS(HepIII)-glucuronic acid glycosyltransferase	310	349	328	477902	418715	458046	11	436	265	316	269	389634	387407	408321	11	381	0.31827714067543783	1.0
	2796786	2796337		-	ygaU	b2665	uncharacterized protein	17	23	20	26596	28515	28593	1	62	23	25	22	34895	30633	34839	2	74	0.3184433481556729	1.0
	1662990	1663607		+	ynfG	b1589	oxidoreductase, Fe-S subunit	2	2	3	4360	2484	5441	0	6	1	2	2	1758	2546	4370	0	4	0.3186785762955538	1.0
	2092398	2093468		+	hisC	b2021	histidinol-phosphate aminotransferase	3	12	16	5641	15475	22888	0	13	9	13	15	14412	16781	23194	0	16	0.3187249402086354	1.0
	1851887	1852528		+	pncA	b1768	nicotinamidase/pyrazinamidase	53	69	46	82012	83755	65518	3	120	66	88	45	97856	108043	69155	4	142	0.31930258903952563	1.0
	1048691	1047945		-	gfcC	b0985	putative O-antigen capsule production periplasmic protein	10	18	14	15461	21648	19684	0	25	8	9	13	12252	11609	20908	0	19	0.3193065416239191	1.0
	4487318	4488400		+	lptG	b4262	lipopolysaccharide export ABC permease of the LptBFGC export complex	43	61	41	66603	73125	57394	1	60	56	46	63	83427	57191	96807	2	73	0.3193927645789633	1.0
	1686588	1685185		-	fumC	b1611	fumarate hydratase (fumarase C),aerobic Class II	137	164	180	211939	196665	252117	4	156	109	157	125	160314	192472	190910	3	129	0.3196892542525366	1.0
	537633	539087		+	ybbW	b0511	putative allantoin transporter	5	1	2	7977	1544	2972	0	2	0	2	3	922	2716	5225	0	2	0.31989781086725483	1.0
	3834537	3832219		-	yicI	b3656	putative alpha-glucosidase	218	298	279	335784	356975	389464	4	155	279	324	255	410280	396929	388398	4	171	0.3199921403217618	1.0
	4177743	4178288		+	nusG	b3982	transcription termination factor	10	13	14	16378	16285	20369	0	32	11	10	8	16521	12479	12569	0	25	0.32010323517965533	1.0
	4001426	4002376		+	corA	b3816	magnesium/nickel/cobalt transporter	89	93	68	137740	112052	95417	3	120	74	83	66	109776	101655	100409	3	109	0.3204363088315813	1.0
	2475873	2476178		+	yfdT	b2363	CPS-53 (KpLE1) prophage; uncharacterized protein	24	55	40	37117	65931	56609	4	173	29	41	30	42887	50527	46449	4	152	0.3204925363791463	1.0
	2931055	2931810		+	ygdG	b2798	Ssb-binding protein, misidentified as ExoIX	14	9	16	22564	11902	23664	0	25	12	15	22	18092	19349	33679	0	31	0.3215747620685674	1.0
	911049	909331		-	poxB	b0871	pyruvate dehydrogenase (pyruvate oxidase), thiamine triphosphate-binding, FAD-binding	13	16	10	20920	20355	14367	0	10	12	12	6	18750	15210	9900	0	8	0.3218925498102583	1.0
	2719223	2719921		+	yfiP	b2583	DTW domain protein	39	20	25	60996	24071	35678	1	57	39	43	19	58657	53661	29832	1	67	0.3221111524388114	1.0
	276715	277647		+	mmuM	b0261	CP4-6 prophage; S-methylmethionine:homocysteine methyltransferase	28	34	32	43173	41908	45438	1	46	28	45	35	41308	55925	54256	1	54	0.32228368491441983	1.0
	2467855	2468217		+	gtrA	b2350	CPS-53 (KpLE1) prophage; bactoprenol-linked glucose translocase (flippase)	12	19	15	19830	23941	22178	1	60	15	17	23	23206	21888	34926	2	73	0.322346284418667	1.0
	1501562	1502155		+	tehB	b1430	tellurite, selenium methyltransferase, SAM-dependent; tellurite, selenium resistance protein	6	11	6	10174	13182	9313	0	18	5	6	5	7752	8333	9045	0	14	0.3225433303151509	1.0
	2135652	2133490		-	wzc	b2060	colanic acid production tyrosine-protein kinase; autokinase; Ugd phosphorylase	56	68	59	86442	81618	83370	1	38	49	69	40	72976	85086	61732	0	33	0.32269980701048767	1.0
	2121554	2120160		-	wcaJ	b2047	colanic biosynthesis UDP-glucose lipid carrier transferase	8	14	17	13116	17081	24647	0	13	13	13	19	20543	17064	29596	0	16	0.3236617099841738	1.0
	1045803	1044664		-	gfcE	b0983	putative O-antigen capsule outer membrane auxillary protein export channel	17	27	14	26959	32360	20716	0	23	24	24	19	36270	29487	30137	0	28	0.3237567792100933	1.0
	312777	312514		-	ykgM	b0296	50S ribosomal protein L31 type B; alternative L31 utilized during zinc limitation	8	6	12	13228	7853	17950	1	49	6	7	7	9118	9006	11924	1	37	0.3247336392085582	1.0
	178462	177662		-	btuF	b0158	vitamin B12 transporter subunit: periplasmic-binding component of ABC superfamily	35	58	34	54905	69654	48616	1	72	35	42	31	52561	52026	47784	1	63	0.32509113181980914	1.0
	4462660	4460522		-	nrdD	b4238	anaerobic ribonucleoside-triphosphate reductase	44	61	37	68082	73077	52935	0	30	39	46	36	57812	56547	54684	0	26	0.32518867483672337	1.0
	4376875	4377192		+	sugE	b4148	multidrug efflux system protein	16	11	14	24796	14046	20353	1	62	6	17	11	8828	20933	17123	1	49	0.3253270337718065	1.0
	3584759	3585043		+	yrhB	b3446	stable heat shock chaperone	0	4	3	1055	5389	5424	0	13	0	3	2	1220	3728	3419	0	9	0.3254685807177752	1.0
	1298121	1295446		-	adhE	b1241	fused acetaldehyde-CoA dehydrogenase/iron-dependent alcohol dehydrogenase/pyruvate-formate lyase deactivase	63	64	82	97283	77460	115465	0	36	83	89	55	122532	109508	83627	1	39	0.32559516637638225	1.0
	3430838	3430020		-	aroE	b3281	dehydroshikimate reductase, NAD(P)-binding	47	63	58	73620	76071	81471	2	94	59	81	56	88054	100169	86226	3	111	0.3257606762940277	1.0
	1222988	1222644		-	ymgG	b1172	UPF0757 family protein	2	2	1	3798	3042	2460	0	8	3	0	4	4747	891	7083	0	12	0.3258510426720181	1.0
	3407375	3407617		+	yhdT	b3257	DUF997 family putative inner membrane protein	8	11	4	12709	13903	6531	1	45	3	5	8	5276	6784	13511	1	35	0.3259949461745872	1.0
	3922440	3922060		-	atpI	b3739	ATP synthase, membrane-bound accessory factor	3	6	13	6142	8234	18924	0	29	11	4	13	16982	5645	19774	1	37	0.3260592138324904	1.0
	2603847	2604794		+	hyfC	b2483	hydrogenase 4, membrane subunit	10	11	9	16793	13597	13070	0	15	17	13	7	25922	16986	10676	0	18	0.32620926218915736	1.0
491896			491701	-	-	predicted RNA	antisense: apt	2562	2493	2507	3945734	2986484	3499570	477	17741	2068	2371	1923	3037935	2902157	2920202	437	15068	0.3264460041490147	1.0
	4199504	4200094		+	yjaG	b3999	DUF416 domain protein	86	78	89	133915	93752	124713	5	198	82	129	80	120508	157976	122862	6	226	0.32759241016664764	1.0
	651856	650798		-	citC	b0618	[citrate [pro-3S]-lyase] ligase	73	88	70	113497	106499	97795	2	100	86	94	60	127066	116123	92559	3	105	0.3277158631592597	1.0
	4004178	4003288		-	rarD	b3819	putative chloramphenical resistance permease	56	71	61	87497	86109	85352	2	96	60	79	73	88840	97488	110860	3	111	0.32813664024426076	1.0
607734			607792	+	sokE	b4700	-	12	34	22	20012	41377	31781	14	526	18	28	31	27535	35344	47967	18	626	0.32815967998699275	1.0
	1588839	1588309		-	ydeS	b1504	putative fimbrial-like adhesin protein	3	5	5	5788	7036	7910	0	13	4	5	1	6164	6374	2904	0	9	0.32880510235411375	1.0
	1606100	1606975		+	lsrF	b1517	putative autoinducer-2 (AI-2) aldolase	7	6	9	11766	7424	13202	0	12	9	7	11	14591	9133	17463	0	15	0.33001179887395743	1.0
	638573	637827		-	dsbG	b0604	thiol:disulfide interchange protein, periplasmic	66	84	61	102188	100789	86020	3	128	44	81	60	65488	99292	91774	3	114	0.3301294332185778	1.0
	3296409	3296984		+	yraP	b3150	outer membrane lipoprotein	80	109	92	123974	130917	129708	6	222	112	132	90	165155	161563	138066	7	268	0.33072071028450534	1.0
	2022893	2023678		+	fliR	b1950	flagellar export pore protein	53	62	70	82592	74309	99058	2	108	48	67	46	71422	82603	70437	2	95	0.33101502236342256	1.0
	2397442	2396465		-	nuoH	b2282	NADH:ubiquinone oxidoreductase, membrane subunit H	4	6	8	6445	8139	11468	0	8	5	12	7	7368	15776	10746	0	11	0.33168506129778486	1.0
632087	632182	632379	632379	+	ybdD	b4512	DUF466 family protein	62	67	52	95950	81441	73181	11	421	43	75	41	63439	92522	63729	10	369	0.33171080413499043	1.0
	237335	238120		+	yafT	b0217	lipoprotein	3	8	12	5718	10773	17967	0	14	7	13	10	11261	16363	16006	0	18	0.3318255325144939	1.0
3055983			3056165	+	ssrS	b2911	-	5	6	6	8132	8261	9437	1	47	4	12	8	6634	14877	12142	1	61	0.3324154102354529	1.0
	1340243	1340551		+	yciS	b1279	DUF1049 family inner membrane protein, function unknown	0	0	1	1012	939	1502	0	3	1	2	0	2100	2603	43	0	5	0.3325217846791379	1.0
	4329360	4330238		+	yjcZ	b4110	YjcZ family protein, mutational suppressor of yhjH motility mutation	19	33	28	30472	40519	39600	1	41	31	39	23	46482	48503	35484	1	49	0.3327095910812122	1.0
	1455925	1456422		+	paaD	b1391	ring 1,2-phenylacetyl-CoA epoxidase subunit	13	4	6	21033	5791	8380	0	23	7	14	10	11705	17332	15378	0	29	0.33289241069045034	1.0
	2637356	2635884		-	der	b2511	GTPase; multicopy suppressor of ftsJ	66	67	81	101739	80264	113409	1	66	68	52	64	100119	64697	97984	1	59	0.33332749813868534	1.0
4481787			4481814	+	-	predicted RNA	antisense: valS	323	363	342	497698	435238	478564	454	16803	305	313	275	448676	383714	418483	430	14891	0.33348775581983786	1.0
	3260110	3259721		-	tdcF	b3113	putative reactive intermediate deaminase	6	6	3	10417	7343	4822	0	19	1	7	3	2237	9133	5669	0	14	0.33387436606379056	1.0
	1194288	1193827		-	nudJ	b1134	bifunctional thiamine pyrimidine pyrophosphate hydrolase/ thiamine pyrophosphate hydrolase	10	3	6	16914	4294	8405	0	21	5	4	6	7616	5942	9324	0	16	0.33435370106645834	1.0
	283201	285168		+	yagF	b0269	CP4-6 prophage; dehydratase family protein	11	17	6	17139	21546	8760	0	8	13	19	9	20517	23806	13738	0	9	0.3344622348712282	1.0
657938	657938	657555	657555	-	flc	b0624	fluoride efflux channel, dual topology membrane protein	183	290	175	282116	347754	244554	20	759	227	276	193	334033	338641	294138	24	839	0.33464152361709665	1.0
	2242967	2241810		-	yeiB	b2152	DUF418 family putative inner membrane protein	6	21	7	10408	26248	10304	0	13	2	17	8	3364	20933	12142	0	10	0.3353738813202042	1.0
	458888	461242		+	lon	b0439	DNA-binding ATP-dependent protease La	65	96	73	101358	115931	102485	1	45	81	71	54	119176	88001	83225	1	41	0.3364773060644723	1.0
	222833	223408		+	gmhB	b0200	D,D-heptose 1,7-bisphosphate phosphatase	4	2	3	6272	3035	5342	0	8	0	5	1	1331	6834	2643	0	6	0.33671361498428887	1.0
	1630913	1629453		-	ydfI	b1542	putative NAD-dependent D-mannonate oxidoreductase	48	94	78	75116	112596	108983	1	67	55	61	71	81258	75168	107780	1	60	0.33678507664237134	1.0
3575720	3574878	3573775	3573775	-	asd	b3433	aspartate-semialdehyde dehydrogenase, NAD(P)-binding	289	287	252	445085	344344	352481	9	344	282	387	243	415411	474099	370263	11	380	0.33700647341320294	1.0
	2225801	2226379		+	yohD	b2136	DedA family inner membrane protein	8	13	10	13038	15775	14152	0	24	6	7	9	9076	9451	14619	0	19	0.33716003819596235	1.0
	3484218	3484436		+	yheU	b3354	UPF0270 family protein	15	23	9	23922	27623	13169	2	98	10	15	10	15915	19554	16320	2	78	0.33811331924232413	1.0
964041			961728	-	-	predicted RNA	antisense: rpsA cmk ihfB	362862	339284	311560	558829062	406384211	434758995	5424	201666	325135	323018	247643	477487235	395346225	375872156	5219	179876	0.3382593678120415	1.0
	886131	885316		-	ybjI	b0844	5-amino-6-(5-phospho-D-ribitylamino)uracil phosphatase; pyrimidine phosphatase; riboflavin synthesis	60	87	93	93355	104389	130170	3	133	68	87	93	101007	106494	142140	4	142	0.33878221321779173	1.0
	3170484	3171833		+	qseC	b3026	quorum sensing sensory histidine kinase in two-component regulatory system with QseB	18	27	16	28075	32768	23193	0	20	10	21	18	15249	26395	27520	0	17	0.3389770356456993	1.0
	152812	152243		-	yadM	b0138	putative fimbrial-like adhesin protein	6	5	3	10019	6247	5193	0	12	5	9	5	8307	11213	9002	0	16	0.3390820066181559	1.0
	290305	289301		-	argF	b0273	ornithine carbamoyltransferase 2, chain F; CP4-6 prophage	3	0	1	5468	0	2650	0	2	1	0	1	1562	1124	2712	0	1	0.3391556897287057	1.0
	2019618	2020082		+	fliL	b1944	flagellar biosynthesis protein	12	11	8	18809	14250	12154	0	32	14	13	11	21960	16271	17088	1	39	0.3391591988404197	1.0
	1998479	1997811		-	yecS	b1918	ABC family putative inner membrane permease	7	5	6	11550	6859	8735	0	13	11	7	6	16342	9310	9307	0	17	0.3395118241582671	1.0
2737154	2737154	2737495	2737506	+	raiA	b2597	cold shock protein associated with 30S ribosomal subunit	56	73	79	87030	88451	111353	7	279	67	81	75	98633	100205	114340	8	305	0.33962663098854473	1.0
	1950522	1948750		-	aspS	b1866	aspartyl-tRNA synthetase	48	69	61	73992	83428	86351	1	45	58	80	66	85186	98804	100994	1	53	0.3397822988575574	1.0
	3043623	3043312		-	yqfB	b2900	UPF0267 family protein	32	37	36	49688	44419	51457	4	155	26	24	37	38968	30116	56175	3	133	0.33978642435765477	1.0
	461451	461723		+	hupB	b0440	HU, DNA-binding transcriptional regulator, beta subunit	3	5	4	5753	6158	6886	0	22	3	6	0	4875	7732	1378	0	17	0.34027927213780856	1.0
	828981	827245		-	ybhF	b0794	putative transporter subunit of ABC superfamily: ATP-binding component	17	19	13	26414	23512	18677	0	13	16	20	22	23565	24478	34359	0	15	0.3411180924081375	1.0
	1310865	1310569		-	yciI	b1251	putative DGPF domain-containing enzyme	8	10	8	13419	12358	11460	1	41	10	14	9	14754	17488	14200	1	52	0.3412206066237394	1.0
	4478473	4478889		+	rraB	b4255	protein inhibitor of RNase E	41	45	43	63912	54192	61250	3	143	39	36	36	57675	44605	55608	3	126	0.341405161793387	1.0
	1795552	1795253		-	ihfA	b1712	integration host factor (IHF), DNA-binding protein, alpha subunit	6	5	4	10616	6635	5788	0	25	2	5	5	2971	6126	8417	0	19	0.3415247731111828	1.0
	2132070	2130853		-	wcaC	b2057	putative glycosyl transferase	7	10	8	12303	12488	11378	0	9	12	9	10	17879	11227	16163	0	12	0.3420660322640746	1.0
	2859760	2860416		+	pphB	b2734	serine/threonine-specific protein phosphatase 2	11	12	10	17918	14461	15308	0	24	8	14	18	12064	17856	28236	0	29	0.34219034567695744	1.0
	1434224	1433991		-	ynaE	b1375	cold shock protein, Rac prophage	1	1	2	2431	1851	3624	0	11	1	4	2	1562	6062	3087	0	15	0.3425787243288045	1.0
	3513638	3512634		-	trpS	b3384	tryptophanyl-tRNA synthetase	8	9	11	12978	11889	16431	0	13	8	19	9	12807	23402	14567	0	16	0.34263103563840724	1.0
	2604811	2606250		+	hyfD	b2484	hydrogenase 4, membrane subunit	21	35	31	32981	42452	44273	0	27	16	29	25	24812	36632	38433	0	23	0.34301722911225935	1.0
2924193			2924511	+	-	predicted RNA	antisense: csrB	53475	49785	45758	82355684	59630971	63853191	5784	215088	32813	35621	25886	48189941	43597078	39290081	3987	136966	0.34382598360363054	1.0
	1743242	1742601		-	ribC	b1662	riboflavin synthase, alpha subunit	32	35	35	49740	42146	49979	1	73	29	29	28	42827	35550	43248	1	63	0.3439039255382955	1.0
	3515059	3514382		-	rpe	b3386	D-ribulose-5-phosphate 3-epimerase	14	16	13	22175	19810	19139	0	30	13	23	16	20141	28227	25549	1	36	0.3439249623136499	1.0
	2292964	2292407		-	dsbE	b2195	periplasmic thioredoxin of cytochrome c-type biogenesis	2	3	5	3460	3885	8306	0	9	4	5	5	6232	6975	8190	0	12	0.3439480546007104	1.0
	417142	417831		+	phoB	b0399	response regulator in two-component regulatory system with PhoR (or CreC)	26	39	32	41382	46910	45074	1	64	31	39	38	45867	48793	58548	2	74	0.34421418456098285	1.0
	1335831	1338506		+	acnA	b1276	aconitate hydratase 1	335	431	382	516525	516489	533465	5	195	350	384	310	514122	471121	471449	5	181	0.344263203334396	1.0
	1759290	1758874		-	sufE	b1679	sulfur acceptor protein	27	39	38	42559	46862	53645	3	114	35	44	37	51494	54021	56673	3	129	0.34456083856694897	1.0
	3685618	3683630		-	yhjK	b3529	cyclic-di-GMP phosphodiesterase	45	71	47	70349	85164	65956	1	37	47	57	36	70116	69791	55076	0	32	0.3451762094704919	1.0
	4247971	4249311		+	lamB	b4036	maltose outer membrane porin (maltoporin)	70	87	70	108626	104484	98117	2	77	75	93	67	111407	114538	101980	2	81	0.34575982260606947	1.0
	3856307	3855960		-	yidH	b3676	DUF202 family inner membrane protein	11	7	10	17208	9486	15151	1	40	9	6	19	14566	7378	29344	1	49	0.34580472725462275	1.0
	974319	975641		+	mukF	b0922	chromosome condensin MukBEF, kleisin-like subunit, binds calcium	7	13	3	10918	15720	5333	0	8	6	13	8	10228	17099	13040	0	10	0.34616682370276036	1.0
	2574305	2573502		-	eutT	b2459	cobalamin adenosyltransferase involved in ethanolamine utilization	6	10	1	10269	12011	2047	0	10	3	6	3	5379	8383	4876	0	7	0.3462064948047641	1.0
	3161146	3158927		-	ygiQ	b4469	Radical SAM superfamily protein	24	38	43	37869	46590	60036	0	21	34	43	39	51306	52989	59220	0	24	0.34679084520521436	1.0
3374869	3374869	3376236	3377738	+	dcuD	b3227	putative transporter	388	503	427	598901	602599	596589	11	438	431	529	429	633922	647845	651892	13	471	0.34685659208874364	1.0
2526946	2526946	2527944	2531268	+	yfeH	b2410	putative inorganic ion transporter	308	444	369	474952	531985	515168	13	507	290	390	324	427339	477891	492925	13	466	0.3469020502968391	1.0
	3672414	3673313		+	yhjC	b3521	LysR family putative transcriptional regulator	8	20	11	13445	24649	15490	0	19	5	7	16	7838	9579	25200	0	15	0.3470446133773076	1.0
	1324098	1324718		+	yciO	b1267	putative RNA binding protein	28	17	16	44497	20770	22871	1	47	14	19	18	20739	23869	28628	1	39	0.3474287168849824	1.0
	4361934	4360396		-	cadC	b4133	cadBA operon transcriptional activator	22	19	26	34365	23669	36388	0	20	24	31	24	35322	38776	37360	0	24	0.34758564698139194	1.0
	2230624	2231022		+	yohJ	b2141	UPF0299 family inner membrane protein	4	7	5	6324	8554	8166	0	19	5	5	1	8350	6586	2643	0	14	0.34766556969955215	1.0
1757101			1755525	-	-	predicted RNA	antisense: pykF	39513	42477	40165	60853806	50878392	56048567	957	35464	33115	35146	31377	48632078	43016299	47624938	852	29438	0.34766613332708374	1.0
953293			953559	+	-	predicted RNA	antisense: pflB	3783	4174	3978	5826812	4999632	5551688	552	20447	3491	3668	3187	5127971	4490314	4837438	522	18047	0.3484166699233379	1.0
	3252304	3252669		+	yhaH	b3103	DUF805 family inner membrane protein	8	11	14	12917	13352	20039	1	42	12	17	11	18297	21245	16826	1	51	0.34899053671759095	1.0
	2989304	2989786		+	yqeJ	b2848	uncharacterized protein	6	2	4	9595	2518	5911	0	12	1	6	2	2126	7400	3916	0	9	0.34926003018031654	1.0
	3989066	3987885		-	hemX	b3803	putative uroporphyrinogen III methyltransferase	67	75	73	103754	90274	102700	2	83	66	67	56	97626	82079	85415	2	74	0.3493029822557569	1.0
	1665315	1666571		+	clcB	b1592	H(+)/Cl(-) exchange transporter	71	102	99	110382	122995	138725	2	98	77	88	71	114011	108468	107798	2	87	0.3499087789102642	1.0
	3073691	3072672		-	epd	b2927	D-erythrose 4-phosphate dehydrogenase	103	116	100	158998	139070	140219	3	143	112	151	116	164890	184888	177154	5	172	0.3500868223417335	1.0
	3922051	3921236		-	atpB	b3738	F0 sector of membrane-bound ATP synthase, subunit a	39	59	48	60287	70688	67740	2	81	66	49	52	97848	60325	78977	2	96	0.3501831718001329	1.0
	1836073	1837239		+	ynjB	b1754	putative ABC superfamily transporter periplasmic-binding protein	4	6	5	7553	8152	7711	0	6	2	9	9	3859	11864	15047	0	8	0.35033063617818505	1.0
	1222634	1222305		-	ymgD	b1171	uncharacterized protein	4	6	8	7622	7275	12278	0	27	3	5	6	5336	6119	9621	0	21	0.35035151680906207	1.0
3215473	3215473	3214967	3210661	-	mug	b3068	G/U mismatch-specific DNA glycosylase; xanthine DNA glycosylase	216	284	269	333370	340662	375493	18	690	203	227	225	298275	278457	342768	17	604	0.35053305041636507	1.0
2440120	2440120	2438942	2437919	-	yfcJ	b2322	putative arabinose efflux transporter	344	459	402	530048	550142	562331	12	464	363	419	368	533529	512904	558845	13	453	0.35054874499784333	1.0
	463937	464308		+	ybaV	b0442	putative competence-suppressing periplasmic helix-hairpin-helix DNA-binding protein	18	29	19	28075	35762	26554	2	80	10	24	19	15479	30279	29631	1	67	0.3506737550554685	1.0
	2101268	2099862		-	gnd	b2029	6-phosphogluconate dehydrogenase, decarboxylating	15	27	27	24156	33340	37932	0	22	31	22	25	45739	27626	39061	0	26	0.3512659237531282	1.0
	2186960	2187298		+	rcnB	b2107	periplasmic modulator of Ni and Co efflux	7	2	4	11195	2851	5779	0	19	3	9	5	5584	12033	8714	0	25	0.3513209930528207	1.0
	819884	820588		+	ybhL	b0786	UPF0005 family inner membrane protein	4	8	14	7682	10541	20898	0	18	10	15	8	15701	19391	13145	0	22	0.35177276371290916	1.0
	3747084	3748580		+	lyxK	b3580	L-xylulose kinase	5	6	4	8098	7431	5606	0	4	5	11	3	8649	14036	5242	0	6	0.35190989973287623	1.0
	1562481	1560931		-	ddpA	b1487	D-ala-D-a la transporter subunit	25	30	25	38622	36953	36107	0	24	30	30	31	44544	37920	48394	0	28	0.3519615031224925	1.0
	4024988	4026481		+	ubiD	b3843	3-octaprenyl-4-hydroxybenzoate decarboxylase	51	53	50	79356	64005	70786	1	47	41	47	45	61364	58167	69016	1	42	0.352175148373021	1.0
	4325165	4324377		-	phnC	b4106	phosphonate ABC transporter ATP-binding subunit	13	11	11	20617	14271	15655	0	21	12	19	12	17785	24365	19146	0	25	0.3521882177650494	1.0
	3871730	3870438		-	dgoT	b3691	D-galactonate transporter	29	43	45	44696	52130	63223	1	41	38	42	47	57257	52437	72845	1	47	0.35233600804387905	1.0
	1653915	1652896		-	rspB	b1580	putative Zn-dependent NAD(P)-binding oxidoreductase	26	60	31	41391	72961	43415	1	51	39	51	37	58580	63544	56934	1	58	0.35243841389621455	1.0
	2162876	2164279		+	baeS	b2078	sensory histidine kinase in two-component regulatory system with BaeR	36	45	37	55883	54654	51746	1	38	37	42	24	54858	51694	37377	1	34	0.3525042723746577	1.0
	3097267	3098403		+	yggW	b2955	HemN family putative oxidoreductase	55	97	87	84988	117020	122103	2	95	58	69	82	86065	84548	125418	2	86	0.35309667241986664	1.0
	1459054	1460481		+	paaH	b1395	3-hydroxyadipyl-CoA dehydrogenase, NAD+-dependent	4	6	11	7579	7683	15597	0	7	6	7	13	9631	9253	20054	0	9	0.3532456710304934	1.0
	3008764	3009975		+	ygeY	b2872	putative peptidase	9	23	13	15296	27977	18933	0	17	16	11	7	23966	14503	11549	0	13	0.3536670631161338	1.0
	4581462	4580068		-	hsdS	b4348	specificity determinant for hsdM and hsdR	88	76	74	136200	91132	103765	2	79	100	95	58	148258	117212	88267	2	84	0.3540063664932915	1.0
	3222633	3225725		+	ebgA	b3076	evolved beta-D-galactosidase, alpha subunit	74	86	72	114924	103477	101808	0	34	72	77	59	106822	94934	90221	0	31	0.35432923343831274	1.0
	3785260	3786804		+	gpmM	b3612	phosphoglycero mutase III, cofactor-independent	25	16	23	38864	19817	33267	0	19	14	19	20	21260	24004	31612	0	16	0.35474350580318936	1.0
	200482	200967		+	skp	b0178	periplasmic chaperone	7	5	9	11446	6648	13334	0	21	12	9	6	18758	11687	9132	0	27	0.3547489644389874	1.0
	329334	328747		-	betI	b0313	choline-inducible betIBA-betT divergent operon transcriptional repressor	8	7	6	13410	8772	9223	0	17	6	6	4	10066	7831	6664	0	13	0.35476540700590203	1.0
	189506	188712		-	map	b0168	methionine aminopeptidase	26	20	24	40171	24275	33680	1	41	29	34	19	43451	42504	29361	1	48	0.3548427176574138	1.0
	3020540	3021319		+	ygfM	b2880	putative oxidoreductase	16	33	32	25895	39873	45553	1	47	31	37	25	46388	45546	38398	1	55	0.3549603147485502	1.0
	3250077	3250376		+	yqjK	b3100	uncharacterized protein	3	5	6	5840	6397	9693	0	24	2	4	4	3679	5935	7091	0	18	0.35537868952861174	1.0
	1697052	1696462		-	uidR	b1618	transcriptional repressor	10	7	6	16464	8629	9379	0	19	4	10	4	6454	13279	7283	0	15	0.3555685417551477	1.0
	3804137	3803058		-	waaB	b3628	UDP-D-galactose:(glucosyl)lipopolysaccharide-1,6-D-galactosyltransferase	4	6	7	7042	7649	10222	0	7	3	9	9	5182	12033	15116	0	9	0.3557498941696895	1.0
1196377			1195028	-	-	predicted RNA	antisense: icd	38205	40354	37316	58838596	48335654	52072289	1061	39320	33709	35006	27300	49505652	42845454	41436366	959	33033	0.35647172048030473	1.0
	3617015	3617779		+	nikD	b3479	nickel transporter subunit	16	19	27	25497	22914	38171	1	37	19	35	19	29183	43565	29562	1	44	0.35649914142453354	1.0
	3558079	3556853		-	rtcB	b3421	RNA-splicing ligase	13	13	13	21059	16033	18512	0	15	9	20	18	14651	25022	27486	0	18	0.35718147368920766	1.0
	809344	810384		+	bioB	b0775	biotin synthase	53	51	43	82791	61542	61283	1	65	36	47	46	53133	57743	70019	1	57	0.35732581704909205	1.0
	2853254	2854264		+	hypE	b2730	carbamoyl dehydratase, hydrogenases 1,2,3 maturation protein	15	32	19	24597	39206	26851	0	29	10	25	18	16009	31284	28532	0	25	0.3575420593976626	1.0
	2005303	2005713		+	fliS	b1925	flagellar protein potentiates polymerization	3	10	7	5987	12032	9982	0	22	7	1	5	11586	1740	8539	0	17	0.3578320148542682	1.0
	749707	748979		-	ybgP	b0717	putative periplasmic pilin chaperone	36	41	28	56930	49598	39823	1	66	41	41	35	60587	50413	53846	2	75	0.3578640090575365	1.0
1648823	1648823	1649041		+	ydfC	b1573	uncharacterized protein, Qin prophage	30	51	43	46651	61365	60531	7	256	43	69	31	63669	84534	47330	8	297	0.3581619800643879	1.0
	818055	818567		+	moaB	b0782	inactive molybdopterin adenylyltransferase	1	1	1	2708	1694	1626	0	3	1	3	0	2544	4457	1090	0	5	0.3584284341396465	1.0
	494076	494405		+	ybaB	b0471	DNA-binding protein, putative nucleoid-associated protein	3	10	9	5156	12134	12856	0	30	3	9	4	5541	11149	6908	0	23	0.35844954730561523	1.0
657504			657261	-	-	predicted RNA	antisense: cspE	46989	35880	30372	72366118	42976391	42381892	5759	215470	31382	44025	22924	46088276	53883006	34793972	5433	184105	0.35871457078207425	1.0
	3727361	3726924		-	yiaA	b3562	YiaAB family inner membrane protein, tandem domains	12	34	18	19242	41710	26232	1	66	19	18	14	27962	22051	22679	1	55	0.3590168455164757	1.0
	2096614	2097225	2099191	+	hisI	b2026	fused phosphoribosyl-AMP cyclohydrolase/phosphoribosyl-ATP pyrophosphatase	389	409	352	599498	490853	492403	23	862	376	423	319	552928	518139	484630	24	847	0.35938234995232493	1.0
	3271770	3270625		-	garK	b3124	glycerate kinase I	12	20	11	19155	23955	15506	0	17	11	21	18	16521	25992	28070	0	20	0.3596876962189002	1.0
	637618	636716		-	ybdO	b0603	putative DNA-binding transcriptional regulator	15	12	18	24277	15428	25431	0	24	13	13	11	19526	15925	17184	0	19	0.3596975793767371	1.0
	3409070	3409951		+	prmA	b3259	methyltransferase for 50S ribosomal subunit protein L11	52	55	61	80844	66693	86376	2	88	50	56	42	73804	68581	64811	2	78	0.35972756048284144	1.0
	4514308	4513406		-	fecB	b4290	iron-dicitrate transporter subunit	11	31	20	17503	38151	28428	0	31	20	38	14	29653	47067	22618	1	36	0.35976170129217544	1.0
	2445560	2444751		-	yfcA	b2327	UPF0721 family inner membrane protein	34	47	30	53382	56342	42853	1	62	34	45	42	50990	55797	64829	2	70	0.3599668072526012	1.0
	2952461	2950635		-	recD	b2819	exonuclease V (RecBCD complex), alpha chain	65	94	81	100951	113774	113178	1	59	67	74	72	99060	91531	109542	1	54	0.3600586845222952	1.0
3411553			3410267	-	-	predicted RNA	antisense: fis dusB	47545	40344	36452	73222408	48323029	50866245	1197	44654	33900	43635	27750	49785314	53405496	42119626	1103	37635	0.36074578593512274	1.0
	922913	923233		+	clpS	b0881	regulatory protein for ClpA substrate specificity	1	0	0	2967	932	0	0	4	0	0	0	512	1068	898	0	2	0.36090431675461415	1.0
	2393041	2391512		-	nuoM	b2277	NADH:ubiquinone oxidoreductase, membrane subunit M	2	9	6	3599	11562	8719	0	5	8	6	7	13029	7449	10650	0	6	0.36090758271636697	1.0
	4071756	4070515		-	yihS	b3880	aldose-ketose isomerase; D-mannose isomerase	180	198	147	278620	237920	205854	5	193	132	160	143	194475	196752	218361	4	163	0.3617287613196604	1.0
	4485951	4484440		-	pepA	b4260	multifunctional aminopeptidase A: a cyteinylglycinase, transcription regulator and site-specific recombination factor	48	75	57	73922	90567	80794	1	54	37	70	50	54525	86112	76578	1	47	0.3623903058381168	1.0
	4315102	4314344		-	phnP	b4092	5-phospho-alpha-D-ribosyl 1,2-cyclic phosphate phosphodiesterase	31	36	32	48425	43616	46016	1	60	31	58	26	45585	71199	39916	2	68	0.363061691855961	1.0
	3855970	3855608		-	yidG	b3675	inner membrane protein	16	23	17	24658	28392	24803	1	71	10	12	22	15018	15068	33975	1	58	0.3637020715537772	1.0
	1894731	1894552		-	yoaH	b1811	UPF0181 family protein	30	42	38	46720	51177	54322	7	281	35	32	27	51511	39985	41695	7	246	0.3638770253948457	1.0
	1988716	1989213		+	ftnA	b1905	ferritin iron storage protein (cytoplasmic)	6	8	13	9802	10534	18792	0	26	7	14	1	11304	17219	2172	0	20	0.36391603248474913	1.0
	2385860	2386831		+	yfbL	b2271	putative peptidase	6	9	8	10520	11406	11196	0	11	9	8	11	14497	9890	17001	0	14	0.36392419874016446	1.0
	3669592	3671241		+	treF	b3519	cytoplasmic trehalase	128	138	127	198572	165564	178234	2	109	159	168	124	234264	205652	189375	3	127	0.3639681973056053	1.0
	703944	705890		+	nagE	b0679	fused N-acetyl glucosamine specific PTS enzyme: IIC, IIB, and IIA components	25	38	41	40024	45869	58409	0	24	33	47	36	49786	57693	55102	0	27	0.36412088316742147	1.0
586057			586101	+	pauD	b4635	Xaa tRNA	1	3	2	2535	4008	2906	1	69	1	1	1	2663	1605	2355	1	49	0.36418065852817444	1.0
	622300	623550		+	entS	b0591	enterobactin exporter, iron-regulated	59	91	70	92161	109085	98010	2	79	74	90	64	109178	111220	98560	2	84	0.36431436116190347	1.0
	1907435	1907226		-	cspC	b1823	stress protein, member of the CspA-family	5	4	4	8098	5927	6952	0	33	1	4	5	2279	5072	8661	0	25	0.3644391945907587	1.0
	3971260	3972522		+	wecC	b3787	UDP-N-acetyl-D-mannosaminuronic acid dehydrogenase	21	34	29	33024	41234	41061	0	30	27	34	34	41068	41655	51657	1	35	0.36467944387402906	1.0
	2278237	2277893		-	yejG	b2181	uncharacterized protein	38	47	45	58600	57458	62984	4	172	40	57	52	59024	70972	80425	5	203	0.3657577407414578	1.0
3071541			3072832	+	-	predicted RNA	antisense: epd pgk	39271	33294	34399	60479676	39879209	48001907	1024	38276	30329	30132	26260	44540659	36879688	39857423	905	31289	0.36582865792997793	1.0
	4267114	4268307		+	tyrB	b4054	tyrosine aminotransferase, tyrosine-repressible, PLP-dependent	36	56	38	56367	68129	53901	1	49	40	49	25	59733	60367	37988	1	44	0.3662205308099332	1.0
	1150670	1151404		+	fabG	b1093	3-oxoacyl-[acyl-carrier-protein] reductase	14	13	17	21811	15700	24399	0	28	19	15	17	28927	18521	26718	0	33	0.3662246946050507	1.0
2282797			2282452	-	-	predicted RNA	antisense: rplY	39610	35353	32180	61002396	42345276	44905251	3835	142825	31832	38331	24459	46748070	46914184	37125008	3687	125999	0.36691378349226444	1.0
	4383839	4385341		+	yjeM	b4156	putative transporter	37	56	46	57224	67211	64883	1	41	36	53	31	53876	65702	47418	1	37	0.3669622358673972	1.0
	1495071	1494148		-	ydcI	b1422	putative DNA-binding transcriptional regulator	59	107	77	91650	128610	108801	3	118	90	99	62	132223	121775	95150	3	125	0.36707105607641904	1.0
781369			781444	+	lysZ	b0748	Lys tRNA	0	1	1	1020	2218	1907	0	22	1	1	1	2416	1754	2669	0	29	0.3671129974780909	1.0
	340165	341115		+	yahI	b0323	carbamate kinase-like protein	20	15	27	31026	18980	38370	0	30	25	30	19	36979	37184	29815	1	36	0.36712589447373145	1.0
	1910099	1909308		-	kdgR	b1827	KDG regulon transcriptional repressor	53	70	62	82920	84047	87292	2	107	60	71	32	89011	87831	48586	2	94	0.3671559444569765	1.0
	1924969	1924595		-	yobA	b1841	CopC family protein	2	5	7	4334	6989	10189	0	19	3	6	2	4576	7937	3977	0	14	0.36850348989999304	1.0
	118645	117752		-	nadC	b0109	quinolinate phosphoribosyltransferase	23	19	27	35957	22825	38700	0	36	22	27	30	33743	33703	46589	1	42	0.368817778396812	1.0
	3969031	3970077		+	wzzE	b3785	Entobacterial Common Antigen (ECA) polysaccharide chain length modulation protein	11	19	26	17381	22907	36603	0	24	22	24	18	32342	30498	27974	0	28	0.3689533310771535	1.0
	3540163	3540390		+	feoA	b3408	ferrous iron transporter, protein A	4	2	1	6878	2899	1461	0	16	2	3	4	3978	3841	7030	0	21	0.36906438747296766	1.0
	3401087	3400044		-	mreB	b3251	cell wall structural complex MreBCD, actin-like component MreB	15	18	9	23966	21927	13896	0	19	20	24	7	29789	30286	11584	0	22	0.36922768960655383	1.0
	916047	915352		-	aqpZ	b0875	aquaporin Z	11	27	15	17260	32829	22219	0	34	18	16	7	26810	20778	11540	0	28	0.3692881840063102	1.0
	4391604	4392149		+	orn	b4162	oligoribonuclease	11	10	13	17624	12910	19329	0	30	22	12	8	32581	15210	12273	1	36	0.3693763104452485	1.0
639552			638716	-	-	predicted RNA	antisense: ahpC	35040	35506	33629	53964916	42528120	46928057	1539	57117	28509	32909	26919	41869117	40278726	40857772	1423	48986	0.36957104607007607	1.0
	2055061	2056515		+	amn	b1982	AMP nucleosidase	53	50	65	82488	60330	91247	1	53	64	79	53	94859	97813	81271	1	62	0.3700045329452312	1.0
	1263714	1264970		+	hemA	b1210	glutamyl tRNA reductase	23	42	17	36857	50564	24630	0	29	24	35	34	35348	43119	52049	1	34	0.3701285121101463	1.0
	1125326	1124118		-	mdtH	b1065	multidrug resistance efflux transporter conferring overexpression resistance to norfloxacin and enoxacin	35	43	30	54724	51544	42515	1	41	30	40	23	44970	49062	35772	1	35	0.37032437299684845	1.0
4101421			4100770	-	-	predicted RNA	antisense: sodA	34305	34880	33508	52832773	41778229	46757980	1948	72274	29274	33099	26857	42991188	40510944	40764157	1845	63530	0.37057403576546116	1.0
	1249757	1249125		-	dhaL	b1199	dihydroxyacetone kinase, C-terminal domain	1	2	4	2067	3123	5771	0	5	2	6	1	3133	8284	3026	0	7	0.37101710811648514	1.0
	1797944	1795557		-	pheT	b1713	phenylalanine tRNA synthetase, beta subunit	22	36	27	34348	43636	38650	0	16	22	25	22	33538	30909	33670	0	13	0.3710378061657957	1.0
	578107	578568		+	rzpD	b0556	DLP12 prophage; putative murein endopeptidase	1239	1063	1256	1908911	1273655	1753794	95	3561	816	1001	968	1199573	1225440	1469225	81	2809	0.3713631461730495	1.0
	2971597	2972637		+	tas	b2834	putative NADP(H)-dependent aldo-keto reductase	120	136	122	185629	162984	171447	4	166	106	98	103	156019	120650	156516	3	138	0.37140497079428036	1.0
	1376034	1376822		+	ycjR	b1314	putative TIM alpha/beta barrel enzyme	1	3	3	2586	4219	5061	0	5	2	2	0	3808	3402	1421	0	3	0.37150554989887297	1.0
	3043662	3045101		+	bglA	b2901	6-phospho-beta-glucosidase A	131	148	153	202526	178195	214829	3	137	134	133	92	197925	162836	139733	3	115	0.37155684875131845	1.0
	724979	724407		-	kdpC	b0696	potassium translocating ATPase, subunit C	10	13	4	16231	15918	6861	0	22	10	17	7	15163	21287	11261	0	27	0.37165631486428713	1.0
	3413864	3415021		+	acrE	b3265	cytoplasmic membrane lipoprotein	33	40	33	50986	48965	46858	1	42	27	41	24	39976	50718	37168	1	36	0.3716799398859009	1.0
	2660289	2659903		-	iscU	b2529	iron-sulfur cluster assembly scaffold protein	8	9	5	13644	10854	7745	0	27	7	13	8	11057	16427	12709	1	34	0.37196681386992575	1.0
3147897	3147897	3148937	3149480	+	gpr	b3001	L-glyceraldehyde 3-phosphate reductase	235	291	288	362779	349319	402047	9	356	235	201	253	346046	246996	385188	8	313	0.37201417998590786	1.0
	3283143	3284003		+	kbaY	b3137	tagatose 6-phosphate aldolase 1, kbaY subunit	36	52	55	55727	62392	76930	2	75	40	55	29	59818	68029	44321	1	66	0.37212349360227764	1.0
	3490829	3490266		-	pabA	b3360	aminodeoxychorismate synthase, subunit II	2	6	8	4490	7724	11865	0	14	2	6	4	4226	7683	6812	0	11	0.3723271559326991	1.0
	3503167	3503952		+	frlD	b3374	fructoselysine 6-kinase	12	11	10	18887	13508	15341	0	20	10	12	17	15667	15486	26343	0	24	0.37239874835090375	1.0
	680212	681663		+	djlC	b0649	J domain-containing HscC co-chaperone; Hsc56	11	28	12	18212	34286	17281	0	16	14	16	9	22003	20778	14174	0	13	0.3724221207757477	1.0
4333272	4333272	4332181	4330366	-	basS	b4112	sensory histidine kinase in two-component regulatory system with BasR	977	1238	1029	1505234	1483360	1436206	36	1350	1194	1176	1049	1754226	1440318	1592280	42	1461	0.3734354305069879	1.0
1019006			1020179	+	-	predicted RNA	antisense: ompA	326926	345634	319255	503485802	413989315	445496664	10450	386988	300140	333907	268529	440779567	408673781	407572984	10369	356906	0.3745227226374172	1.0
	2094535	2095125		+	hisH	b2023	imidazole glycerol phosphate synthase, glutamine amidotransferase subunit with HisF	2	8	4	3495	10664	5722	0	11	3	4	3	4636	5985	4553	0	8	0.3753628260558299	1.0
218196			218208	+	-	predicted RNA	antisense: proS	146	152	142	225549	182305	198744	419	15553	115	126	122	168971	154403	186592	377	13076	0.3755493089887258	1.0
	3412621	3412800		+	yhdU	b3263	putative membrane protein	1	2	1	2163	2402	1486	0	11	3	1	0	5541	2334	157	0	14	0.37590563267458227	1.0
	1404565	1403255		-	abgA	b1338	p-aminobenzoyl-glutamate hydrolase, A subunit	6	20	10	10771	24799	14705	0	12	10	9	8	15659	11821	12709	0	10	0.3761487281217488	1.0
	983075	983623		+	ycbK	b0926	M15A protease-related family periplasmic protein	52	51	58	81527	61930	81083	3	136	43	56	43	64549	69062	66181	3	121	0.3763028237421203	1.0
2113996			2114014	+	-	predicted RNA	antisense: wcaN	203	232	226	313687	278079	315547	430	15917	186	207	181	274581	253562	275575	408	14100	0.37641627124910476	1.0
	2891898	2890099		-	cysJ	b2764	sulfite reductase, alpha subunit, flavoprotein	9	10	9	15279	12767	13062	0	7	11	18	7	16308	22235	11304	0	9	0.37646611672629826	1.0
	2461306	2462646		+	fadL	b2344	long-chain fatty acid outer membrane transporter	17	30	25	26405	36062	36190	0	24	23	34	24	35143	42617	37281	0	28	0.3766629703300738	1.0
	2587595	2590708		+	acrD	b2470	aminoglycoside/multidrug efflux system	56	77	53	87471	92384	75278	0	27	54	57	50	79533	70541	76823	0	24	0.3773861922762644	1.0
	3742733	3743731		+	yiaK	b3575	2,3-diketo-L-gulonate reductase, NADH-dependent	10	5	7	16248	6458	10824	0	11	7	15	7	11074	19143	11444	0	13	0.37755582670838966	1.0
	3800965	3800267		-	waaY	b3625	lipopolysaccharide core biosynthesis protein	22	35	30	34729	41989	42341	1	56	25	39	34	36996	48425	52608	1	65	0.37758605898388364	1.0
2537237	2537237	2536386	2533514	-	pdxK	b2418	pyridoxal-pyridoxamine kinase/hydroxymethylpyrimidine kinase	244	297	296	376509	356458	414160	12	448	191	243	283	281557	297629	430068	11	394	0.3777877057040344	1.0
	4635521	4635994		+	creA	b4397	putative periplasmic protein	27	28	16	41901	34245	23383	1	69	23	32	27	34870	39434	41687	2	81	0.37782056894564114	1.0
	1603019	1604047		+	lsrC	b1514	autoinducer 2 import system permease protein	5	12	7	8496	15257	10271	0	11	10	11	8	15035	14354	12857	0	13	0.3778261570142822	1.0
	1942662	1943417		+	znuC	b1858	zinc transporter subunit: ATP-binding component of ABC superfamily	42	45	46	65919	54961	64841	2	81	45	66	47	66120	80905	71624	2	96	0.37797195584753823	1.0
	2230385	2229438		-	dusC	b2140	tRNA-dihydrouridine synthase C	6	4	8	9629	5219	11468	0	9	2	8	3	4021	10845	5835	0	7	0.3796660931201729	1.0
	2788985	2789962		+	csiD	b2659	carbon starvation protein	4	3	5	7440	3845	7472	0	6	4	3	2	5959	4669	3663	0	4	0.3797174672567847	1.0
	2120158	2118680		-	wzxC	b2046	putative colanic acid exporter	17	19	15	26708	23288	21335	0	16	23	18	18	34050	22051	28157	0	18	0.3798050882745282	1.0
	2807132	2808124		+	proX	b2679	glycine betaine transporter subunit	97	109	82	149697	131257	114664	3	132	77	98	73	114241	119992	111732	3	116	0.3802041091956119	1.0
2429105			2430784	+	-	predicted RNA	antisense: purF cvpA	38845	39943	36812	59823931	47843289	51369094	851	31554	34945	39316	31655	51320022	48120353	48045926	850	29263	0.3804251631350203	1.0
	426137	427264		+	tgt	b0406	tRNA-guanine transglycosylase	15	20	23	23758	24356	33440	0	24	19	15	13	28543	18797	20638	0	20	0.3805613153027225	1.0
	1854854	1854096		-	ydjF	b1770	putative DNA-binding transcriptional regulator	4	11	3	6454	13937	5482	0	11	6	11	6	9853	13639	9473	0	14	0.3808889722769601	1.0
203375			203187	-	-	predicted RNA	antisense: lpxA lpxB	2869	2465	2299	4418748	2952885	3208141	500	18659	2143	2314	1784	3148070	2833257	2707772	445	15324	0.38110957402174467	1.0
2286211			2286287	+	proL	b2189	Pro tRNA	2	3	1	3088	3831	1899	1	38	2	4	1	3662	5412	2599	1	50	0.3811971915426628	1.0
	3448759	3448568		-	rpmC	b3312	50S ribosomal subunit protein L29	18	26	29	27781	31475	41070	4	174	28	29	25	42221	36328	38189	5	202	0.38154274030103164	1.0
	2924113	2923784		-	yqcC	b2792	DUF446 family protein	15	8	14	23455	10718	20171	1	54	15	15	15	22856	18726	23456	1	65	0.3817001247482495	1.0
	2248532	2247063		-	lysP	b2156	lysine transporter	30	42	34	47516	51476	47477	0	33	29	50	38	43476	62164	58312	1	37	0.3821702237497758	1.0
	4591279	4589129		-	yjiY	b4354	putative transporter	32	64	46	49325	77201	64940	0	29	53	64	44	78987	79547	67219	1	34	0.38255596419546567	1.0
	573084	573374		+	ybcO	b0549	DLP12 prophage; uncharacterized protein	2	5	1	3910	6104	1527	0	13	1	5	0	1946	6466	0	0	9	0.38271186709906757	1.0
	3571319	3569346		-	glgX	b3431	glycogen debranching enzyme	58	83	60	90205	99714	84410	1	46	69	82	67	101972	100537	101718	1	51	0.38310012567695645	1.0
1411948	1411948	1411013	1410933	-	ttcA	b1344	tRNA 2-thiocytidine biosynthesis protein	223	277	216	343580	332931	302196	9	348	266	290	208	391231	355196	316730	11	378	0.3831715356848401	1.0
	2524878	2524045		-	xapA	b2407	purine nucleoside phosphorylase II	7	4	4	12173	5757	6110	0	9	9	5	6	14643	6876	9455	0	12	0.38320431691608714	1.0
	3133957	3133244		-	yghS	b2985	putative ATP-binding protein	7	10	6	11957	12392	9536	0	15	4	7	7	6070	8949	11906	0	12	0.38332994148638083	1.0
	342884	343933		+	yahK	b0325	aldehyde reductase, NADPH-dependent, Zn-containing, broad specificity	20	15	20	31415	18075	27974	0	24	25	15	23	37184	18613	35214	0	28	0.3835423710628821	1.0
	2231844	2232728		+	cdd	b2143	cytidine/deoxycytidine deaminase	7	18	11	11714	22424	15820	0	18	17	11	12	25725	14545	19565	0	22	0.3837762809943232	1.0
	1162247	1162624		+	ycfL	b1104	uncharacterized protein	3	1	3	5831	1544	5367	0	11	0	2	3	1033	3622	4841	0	8	0.38406792731797024	1.0
2630326	2630326	2630865	2634091	+	yfgI	b2506	nalidixic acid resistance protein, putative periplasmic protein	419	445	501	646625	533142	699504	31	1160	370	376	428	544168	461252	650942	29	1022	0.38437352881156456	1.0
	420986	422359		+	proY	b0402	proline-specific permease	49	58	46	75843	69797	64660	1	51	46	51	37	67725	62695	56393	1	45	0.38446551526708433	1.0
	371239	372105		+	mhpC	b0349	2-hydroxy-6-ketonona-2,4-dienedioic acid hydrolase	29	40	15	46002	48489	21913	1	44	29	34	32	44006	41846	48909	1	51	0.38482745379180167	1.0
	484403	481254		-	acrB	b0462	multidrug efflux system protein	54	71	45	84409	85681	63710	0	24	68	84	45	100307	103409	68911	0	28	0.3850319393290078	1.0
	3104093	3104368		+	yggX	b2962	protein that protects iron-sulfur proteins against oxidative damage	5	8	9	7881	10616	12996	1	38	13	10	4	19544	12451	7091	1	47	0.38531028321999783	1.0
	3228888	3231239		+	ygjK	b3080	alpha-glucosidase	50	76	57	78292	92221	79770	0	35	50	58	50	74154	71680	77259	0	31	0.3854094914333131	1.0
	4542037	4542633		+	fimE	b4313	tyrosine recombinase/inversion of on/off regulator of fimA	29	57	53	46002	69205	75130	2	106	41	63	56	61270	77658	85197	3	125	0.385545825367502	1.0
	1639527	1639030		-	rzpQ	b1553	Rz-like protein, Qin prophage	20	72	38	32142	86885	54405	3	116	33	70	43	48958	86735	65535	3	134	0.3855478586828075	1.0
	4081228	4080299		-	fdhE	b3891	formate dehydrogenase formation protein	69	65	59	107397	78481	83576	2	96	86	72	56	126460	88510	86217	3	107	0.38562084707127253	1.0
	1072863	1072171		-	rutB	b1011	ureidoacrylate amidohydrolase	12	20	13	18999	23955	19197	0	29	19	17	15	28611	21025	24258	1	35	0.3858777294810058	1.0
3423542			3423423	-	rrfF	b3272	5S ribosomal RNA of rrnD operon	5	12	11	8435	14801	16588	3	110	15	12	7	22148	14771	11374	3	134	0.38593933141662273	1.0
	3099565	3098558		-	yggM	b2956	DUF1202 family putative secreted protein	210	220	202	324926	264039	282908	7	288	174	173	199	256617	212189	303550	7	255	0.38597983623664717	1.0
	846463	845741		-	glnQ	b0809	glutamine transporter subunit	14	14	17	21638	17680	24217	0	29	10	14	12	15710	17849	18274	0	23	0.38601181266363294	1.0
	498055	499017		+	hemH	b0475	ferrochelatase	19	38	29	29313	45889	41482	1	40	27	32	36	39754	39978	55294	1	46	0.38605751038517394	1.0
408177	408177	408461	408495	+	yaiE	b0391	UPF0345 family protein	121	133	122	187636	159452	171075	16	606	140	175	117	205618	214793	178087	20	699	0.3860707271261452	1.0
4175472			4175556	+	tyrU	b3977	Tyr tRNA	2	2	5	3080	2415	7084	1	49	4	2	4	7317	3183	6123	1	65	0.3860772042947815	1.0
61515			61525	+	-	predicted RNA	antisense: rapA	124	141	131	191252	169559	182982	446	16478	114	114	98	167836	139731	149886	401	13862	0.38617814680768714	1.0
	3794929	3795975		+	waaF	b3620	ADP-heptose:LPS heptosyltransferase II	91	138	111	141192	166237	155536	4	147	134	154	104	196866	188694	158757	5	173	0.3862720538294238	1.0
	2158386	2161463		+	mdtC	b2076	multidrug efflux system, subunit C	52	43	66	80714	52531	92857	0	24	34	66	46	50580	81259	70045	0	21	0.3866978902302725	1.0
	405644	404835		-	proC	b0386	pyrroline-5-carboxylate reductase, NAD(P)-binding	9	12	9	14206	14842	13846	0	17	9	8	6	13217	10718	9891	0	13	0.38688352170060125	1.0
	1263500	1262877		-	lolB	b1209	lipoprotein localization factor	22	31	23	33950	37668	32350	1	55	22	18	20	33111	22935	31830	1	46	0.38701998230481294	1.0
	3852784	3851096		-	ilvB	b3671	acetolactate synthase 2 large subunit	40	44	41	63081	53225	58492	0	34	40	71	37	58845	87661	56577	1	40	0.38706996593223547	1.0
	880480	879854		-	gstB	b0838	glutathione S-transferase	12	15	13	19640	18347	18330	0	29	12	18	16	18758	22744	25689	1	35	0.3871573544811657	1.0
	433002	433451		+	nrdR	b0413	Nrd regulon repressor	13	15	27	20790	18599	38692	1	57	10	15	19	15770	19264	29849	1	48	0.38721670218872645	1.0
	2642844	2641831		-	rodZ	b2516	MreB assembly cytoskeletal protein	29	15	26	45146	18892	36644	0	33	29	26	26	43997	32309	40605	1	38	0.38754689244875606	1.0
	1401773	1400247		-	abgT	b1336	p-aminobenzoyl-glutamate transporter; membrane protein	43	46	46	67451	55383	64313	1	40	34	54	32	50956	66423	48700	1	36	0.38775162941625707	1.0
430597	430605	430952	432175	+	yajD	b0410	HNH nuclease family protein	339	385	432	523594	462297	603377	41	1522	355	329	370	522003	403600	561915	40	1424	0.38802195621322116	1.0
	1793558	1792809		-	btuD	b1709	vitamin B12 transporter subunit : ATP-binding component of ABC superfamily	3	5	5	5485	6077	7307	0	8	3	5	8	5165	6699	12848	0	10	0.3882904464136987	1.0
3477137			3477335	+	-	predicted RNA	antisense: fkpA	2557	2805	2483	3939046	3360664	3465329	487	18031	2280	2576	1936	3348676	3153696	2939279	460	15815	0.38830823659276126	1.0
	2838105	2837578		-	hydN	b2713	formate dehydrogenase-H, [4Fe-4S] ferredoxin subunit	31	43	49	49030	52558	69705	2	108	37	37	33	55293	46374	51439	2	96	0.3888221395153817	1.0
	3909439	3908549		-	pstA	b3726	phosphate transporter subunit	9	19	13	14024	23914	18569	0	21	13	14	4	20218	18146	7554	0	17	0.3890270672725425	1.0
3070216			3071484	+	-	predicted RNA	antisense: fbaA pgk	49401	41767	44605	76080610	50027603	62243745	1323	49475	36536	36002	33548	53657325	44064067	50919731	1127	39044	0.38912256613709995	1.0
	3476440	3475718		-	yheO	b3346	putative PAS domain-containing DNA-binding transcriptional regulator	43	31	28	66577	37893	40170	1	66	28	43	20	41401	53639	31367	1	58	0.3893188136649609	1.0
	2682745	2679464		-	yphG	b2549	DUF4380 domain-containing TPR repeat protein	62	66	49	96565	79059	68945	0	24	60	73	68	89113	89593	103375	0	28	0.38948324811363916	1.0
2685835	2685835	2687025	2688117	+	hmp	b2552	fused nitric oxide dioxygenase/dihydropteridine reductase 2	324	330	371	499974	395372	517967	10	395	281	308	316	413345	376964	479727	10	355	0.38993765737836295	1.0
	2009821	2010489		+	yedK	b1931	DUF159 family protein	2	4	10	3426	5002	14689	0	11	3	11	7	4456	14340	11060	0	14	0.39013346971397195	1.0
	3199641	3196801		-	glnE	b3053	fused deadenylyltransferase/adenylyltransferase for glutamine synthetase	21	33	29	32557	39907	41028	0	13	14	34	21	21866	42030	32091	0	11	0.390375293842469	1.0
	98403	99647		+	ftsW	b0089	lipid II flippase; integral membrane protein involved in stabilizing FstZ ring during cell division	6	10	11	9508	13086	16571	0	10	13	13	7	19680	16328	11496	0	12	0.3906055240465126	1.0
	1477621	1478226		+	ynbA	b1408	inner membrane protein	2	3	2	3850	4151	3641	0	6	3	2	0	4824	2667	1055	0	4	0.39063772242775846	1.0
	3902220	3900604		-	bglH	b3720	carbohydrate-specific outer membrane porin, cryptic	25	32	29	39816	38662	40508	0	24	28	37	32	42298	45688	49424	0	28	0.39068474782280865	1.0
	4077449	4078438		+	yiiD	b3888	putative acetyltransferase	20	40	20	32116	47958	28403	1	36	16	39	35	23958	48036	53663	1	42	0.3908420593341936	1.0
	1465230	1465165		-	ynbG	b4674	uncharacterized protein	0	0	0	1150	830	544	0	12	1	0	0	1571	233	0	0	9	0.3910236568797891	1.0
	3590911	3590024		-	ugpA	b3452	glycerol-3-phosphate transporter subunit	14	13	7	22443	16578	10676	0	18	6	16	6	9494	20474	9979	0	14	0.3918930097002603	1.0
	1195123	1196373		+	icd	b1136	e14 prophage; isocitrate dehydrogenase, specific for NADP+	31	42	39	48321	50816	54462	1	40	34	44	20	50384	54807	30713	1	36	0.3919292868142232	1.0
	2153128	2152469		-	yegL	b2073	VMA domain protein	8	4	6	13696	4961	9635	0	14	7	7	1	11415	8623	2486	0	11	0.3920227551404168	1.0
	2259296	2258355		-	psuK	b2166	pseudouridine kinase	0	1	0	579	1599	1387	0	1	0	0	0	0	827	1482	0	0	0.3921146050903765	1.0
	4075553	4076152		+	yihX	b3885	alpha-D-Glucose-1-P phosphatase, anomer-specific	13	22	20	20972	27249	28560	1	42	15	26	22	23360	32578	34045	1	49	0.3928830254961888	1.0
	149601	148807		-	panB	b0134	3-methyl-2-oxobutanoate hydroxymethyltransferase	21	30	23	33673	36354	32524	1	42	29	38	18	43203	47102	28515	1	49	0.39310273359190373	1.0
	2090192	2091091		+	hisG	b2019	ATP phosphoribosyltransferase	16	23	17	25168	28038	24440	0	28	16	20	10	23958	24980	15683	0	23	0.3933860016748231	1.0
	4612128	4612289		+	ytjA	b4568	uncharacterized protein	2	4	4	4516	5818	5870	0	33	5	1	1	8427	1846	2093	0	25	0.393580259703453	1.0
	1903895	1904746		+	manZ	b1819	mannose-specific enzyme IID component of PTS	30	63	37	47361	76099	51985	1	68	44	54	46	65411	67308	70865	2	79	0.39434791617710463	1.0
	926443	926225		-	infA	b0884	translation initiation factor IF-1	10	10	14	15781	12338	20394	1	73	7	12	7	11705	15606	11610	1	59	0.39493185906070216	1.0
	99644	100711		+	murG	b0090	N-acetylglucosaminyl transferase	11	9	12	17926	11902	17042	0	14	7	10	9	10604	12698	14122	0	11	0.3949626689689692	1.0
	3481161	3480607		-	kefG	b3351	potassium-efflux system ancillary protein for KefB, glutathione-regulated	29	35	28	45829	42105	39253	2	76	21	32	24	31804	40091	36880	1	65	0.39503625160919137	1.0
1316413			1317635	+	-	predicted RNA	antisense: trpB trpA	32978	32953	33216	50788259	39470477	46350838	1002	37233	32079	33100	28797	47110920	40511885	43709211	1036	35795	0.3950650109273911	1.0
	1405979	1406542		+	smrA	b1340	DNA endonuclease	8	19	13	13600	23608	19461	0	33	11	24	13	16461	30555	20359	1	39	0.39607590422927996	1.0
	826108	825002		-	ybhR	b0792	inner membrane putative ABC superfamily transporter permease	101	114	85	155684	137110	119783	3	124	77	105	74	114233	129635	113695	3	107	0.3969664932077477	1.0
2099851			2101308	+	-	predicted RNA	antisense: gnd	32845	32680	33854	50584097	39144011	47242069	842	31314	26866	28319	25584	39455720	34660014	38831803	747	25822	0.3970091533511868	1.0
460450			460344	-	-	predicted RNA	antisense: lon	1280	1335	1387	1972313	1599727	1935488	462	17157	1332	1222	1165	1957061	1496802	1768902	469	16270	0.39738145727894253	1.0
	1092289	1089866		-	pgaA	b1024	biofilm adhesin polysaccharide PGA secretin; OM porin; poly-beta-1,6-N-acetyl-D-glucosamine export protein	40	46	47	62554	55178	66889	0	25	45	55	53	66197	67866	81864	0	29	0.39774900153413584	1.0
	221621	220968		-	metI	b0198	DL-methionine transporter subunit	7	12	10	11507	15053	14730	0	21	6	6	10	9596	7513	15675	0	16	0.3978404676903801	1.0
	3176006	3175425		-	yqiA	b3031	acyl CoA esterase	4	9	4	7129	10779	6927	0	14	7	12	3	10373	15451	5818	0	18	0.39793952396948856	1.0
	3875160	3874471		-	dgoR	b4479	putative DNA-binding transcriptional regulator	3	7	8	4680	9003	12302	0	12	7	9	6	10715	12033	10057	0	15	0.399724110325276	1.0
	2038823	2038152		-	yedW	b1969	response regulator family protein	15	27	15	24017	32925	21567	1	38	11	31	23	16615	38846	36217	1	45	0.40064209321788913	1.0
	3805116	3804181		-	waaS	b3629	lipopolysaccharide core biosynthesis protein	4	26	14	7284	31318	20749	0	21	9	19	21	14284	23700	32327	0	25	0.4007636785832836	1.0
	3996287	3997183		+	xerC	b3811	site-specific tyrosine recombinase	14	21	21	21811	25928	29683	0	28	18	28	18	26989	34962	28506	0	33	0.4008585257100957	1.0
	3761249	3759858		-	selA	b3591	selenocysteine synthase	24	27	32	37731	33142	45413	0	27	30	21	18	44074	26841	27861	0	23	0.4010150904356936	1.0
	1663609	1664463		+	ynfH	b1590	oxidoreductase, membrane subunit	13	16	14	21076	19388	19659	0	23	14	14	6	21277	18224	9726	0	19	0.40106934200883876	1.0
2818135			2818059	-	argZ	b2692	Arg tRNA	2	0	3	4075	1136	4954	1	44	3	2	2	5780	3615	3785	1	57	0.40114258711061374	1.0
	3411653	3412537		+	yhdJ	b3262	DNA adenine methyltransferase, SAM-dependent	24	30	21	37108	35994	29782	1	38	19	22	20	28893	27081	31402	0	32	0.4011437920838144	1.0
	2413132	2412677		-	yfbV	b2295	UPF0208 family inner membrane protein	19	26	17	30152	31250	24580	1	62	25	22	23	37073	27937	35092	2	73	0.40164678279074095	1.0
906753	906753	905740	904548	-	ybjS	b0868	putative NAD(P)H-dependent oxidoreductase with NAD(P)-binding Rossmann-fold domain	342	390	343	527695	467796	479960	13	485	327	362	282	481343	443134	428332	12	444	0.4031087697685486	1.0
781577			781652	+	lysQ	b0749	Lys tRNA	0	0	0	43	306	553	0	3	0	0	0	461	176	575	0	5	0.4033166841764853	1.0
	2827362	2827733		+	srlB	b2704	glucitol/sorbitol-specific enzyme IIA component of PTS	1	0	1	2067	0	2493	0	4	0	2	0	1280	3105	1509	0	5	0.40371984660835103	1.0
	41931	40417		-	caiT	b0040	putative transporter	12	16	10	18991	20232	14656	0	11	9	16	6	14224	20601	9115	0	9	0.403901153847458	1.0
3380363			3380179	-	-	predicted RNA	antisense: yhcB	2665	2938	2521	4104326	3520076	3518949	543	20078	2469	3356	2148	3627091	4107661	3260354	581	19811	0.4041888500741643	1.0
	4419980	4421377		+	ulaA	b4193	L-ascorbate-specific enzyme IIC permease component of PTS	35	39	40	54810	47066	56601	1	37	43	54	31	63396	66112	47967	1	42	0.40438478246245807	1.0
	3690261	3689155		-	bcsZ	b3531	endo-1,4-D-glucanase	16	7	6	25160	9289	9132	0	13	6	10	7	9554	13194	11889	0	10	0.40498994536124694	1.0
	3936278	3937168		+	rbsB	b3751	D-ribose transporter subunit	53	90	70	82817	107921	98051	2	108	57	87	78	85126	106501	119836	3	116	0.40506172827482106	1.0
	1627517	1628263		+	ydfG	b1539	NADP-dependent 3-hydroxy acid dehydrogenase; malonic semialdehyde reductase	19	26	24	30472	31400	34629	1	43	23	29	26	34895	36172	40491	1	49	0.4051295647231827	1.0
	3486791	3488893		+	yhfK	b3358	putative transporter, FUSC superfamily inner membrane protein, tandem domains	253	277	266	390430	332693	372273	4	173	217	252	224	318809	309579	340239	4	153	0.4052786960334722	1.0
	4227731	4229362		+	yjbB	b4020	putative Na+/Pi-cotransporter	36	44	25	55753	53402	35810	0	29	40	56	21	59784	68737	33060	0	33	0.40551380431574807	1.0
	4287764	4289200		+	nrfA	b4070	nitrite reductase, formate-dependent, cytochrome	18	14	15	28119	17721	21129	0	15	18	24	14	27843	29656	21249	0	18	0.4055906455403963	1.0
2806326			2806220	-	-	predicted RNA	antisense: proW	1148	1343	1165	1769415	1609486	1625984	422	15591	1171	1526	937	1720440	1868814	1422705	458	15613	0.40593261451923685	1.0
	3756511	3754973		-	aldB	b3588	aldehyde dehydrogenase B	8	15	14	13834	18898	20056	0	11	10	17	16	15650	21740	25244	0	13	0.4060085012265362	1.0
	1841403	1840783		-	ynjF	b1758	inner membrane protein, phosphatidylglycerophosphate synthase homolog	10	10	8	15556	12617	11601	0	21	7	11	4	11048	14212	6533	0	17	0.4066776609629925	1.0
	4133835	4136015		+	katG	b3942	catalase-peroxidase HPI, heme b-containing	54	65	66	84210	78167	92304	1	38	71	67	67	104371	82341	103201	1	44	0.4067271962390087	1.0
	2336644	2334956		-	yfaA	b2230	DUF2138 family protein, putative host defense protein	15	25	13	24294	29991	18479	0	14	16	24	20	24077	30088	30914	0	16	0.4069214956590911	1.0
	1288624	1287782		-	purU	b1232	formyltetrahydrofolate hydrolase	44	63	46	68714	75622	64594	2	82	35	55	44	51613	68199	66983	2	73	0.4069891366527047	1.0
1923066			1923314	+	ryeA	b4432	-	123	131	93	190655	157758	130195	17	640	82	115	93	121209	141938	141931	15	542	0.40706858673574686	1.0
	3851092	3850802		-	ilvN	b3670	acetolactate synthase 1 small subunit	4	6	2	6558	7472	4004	0	20	8	5	2	12363	6593	4527	0	26	0.4074729182775805	1.0
	3377420	3376782		-	sspA	b3229	stringent starvation protein A, phage P1 late gene activator, RNAP-associated acid-resistance protein, inactive glutathione S-transferase homolog	6	3	5	10096	4586	7720	0	11	7	8	5	10348	10788	7623	0	15	0.40785171768608747	1.0
	763014	764180		+	sucC	b0728	succinyl-CoA synthetase, beta subunit	10	24	18	15789	29617	26356	0	20	19	18	20	29311	22914	31690	0	23	0.4086651196381847	1.0
	3125459	3124236		-	glcF	b4467	glycolate oxidase 4Fe-4S iron-sulfur cluster subunit	19	14	22	30532	17190	31500	0	21	12	20	15	18357	24747	23394	0	18	0.40887071565334193	1.0
	2142948	2142307		-	udk	b2066	uridine/cytidine kinase	20	14	11	30861	17347	16398	0	33	19	12	6	27937	14977	10345	0	27	0.4098006997309193	1.0
	848911	848408		-	dps	b0812	Fe-binding and storage protein; stress-inducible DNA-binding protetin	35	32	33	55018	39206	46998	2	93	24	30	33	35971	37502	50270	2	81	0.4101932526402095	1.0
	1641554	1641339		-	cspB	b1557	Qin prophage; cold shock protein	4	5	6	6912	6553	8801	0	34	2	6	3	3987	7704	5861	0	27	0.4103955236369741	1.0
	779067	779588		+	pal	b0741	peptidoglycan-associated outer membrane lipoprotein	20	21	18	32185	25772	25712	1	53	23	27	19	33777	33746	29666	1	62	0.41092244822993107	1.0
	1567140	1565758		-	dosC	b1490	diguanylate cyclase, cold- and stationary phase-induced oxygen-dependent biofilm regulator	2	7	8	3729	8615	12038	0	5	4	10	7	7035	13088	10833	0	7	0.41137066144121487	1.0
141431	141431	141967	142686	+	hpt	b0125	hypoxanthine phosphoribosyltransferase	359	323	358	554317	387811	500528	23	895	305	312	316	448761	382709	480530	23	814	0.41194421766099015	1.0
	2217407	2216481		-	yehX	b2129	putative ABC superfamily transporter ATP-binding subunit	21	39	22	33275	47175	31904	1	40	22	39	30	33512	48949	46711	1	46	0.4123399825013278	1.0
	3178115	3179596		+	tolC	b3035	transport channel	66	107	75	103054	128889	105061	2	75	69	91	62	102382	111821	95368	2	69	0.4132878260625616	1.0
	448660	448046		-	cyoC	b0430	cytochrome o ubiquinol oxidase subunit III	16	31	27	25064	37151	38320	1	54	25	31	26	37175	39101	39471	1	62	0.41338322983311393	1.0
	211877	212266		+	yaeR	b0187	putative lyase	3	8	4	5000	10072	6159	0	18	4	6	1	6702	7683	2267	0	14	0.4137015263235197	1.0
852597	852597	851014	850222	-	ybiP	b0815	putative EptAB family phosphoethanolamine transferase, inner membrane protein	1135	1150	1088	1749065	1377854	1519519	26	977	1203	1182	1072	1766837	1446671	1628358	29	1018	0.41373778254674903	1.0
	2167520	2167302		-	ogrK	b2082	positive regulator of P2 growth (insertion of P2 ogr gene into the chromosome)	13	25	24	20392	29957	33927	3	128	18	16	16	26451	19632	25383	3	108	0.41381663639591526	1.0
	4178447	4178875		+	rplK	b3983	50S ribosomal subunit protein L11	35	32	39	54369	39444	54438	3	115	27	37	29	41077	45716	44242	2	101	0.4138650368015154	1.0
	1769074	1770186		+	ydiK	b1688	UPF0118 family inner membrane protein	11	12	12	17944	15407	18066	0	15	12	18	12	18066	23134	19644	0	18	0.4139951417730687	1.0
2622877			2621183	-	-	predicted RNA	antisense: purM purN	39158	44197	38756	60306393	52938791	54081132	891	32905	38627	42727	33208	56727185	52294764	50403436	911	31352	0.41399692554382195	1.0
	1423400	1423585	1423585	+	rzoR	b4528	Rac prophage; putative lipoprotein	27	34	43	42922	40724	61060	6	259	29	31	29	43741	38832	44888	6	228	0.414056120110955	1.0
	3332735	3331770		-	yhbE	b3184	EamA family inner membrane putative transporter	9	18	10	13921	22689	15035	0	17	10	11	8	15181	13781	13189	0	14	0.4145357024343321	1.0
	1942583	1941651		-	znuA	b1857	zinc transporter subunit: periplasmic-binding component of ABC superfamily	5	14	12	9153	17612	18074	0	16	8	13	15	12431	16561	24232	0	19	0.41454854224153764	1.0
	2736011	2735031		-	rluD	b2594	23S rRNA pseudouridine(1911,1915,1917) synthase	13	16	18	20669	19701	26199	0	22	11	11	15	16649	14411	24014	0	18	0.4148469030838958	1.0
	4013053	4015314		+	metE	b3829	5-methyltetrahydropteroyltriglutamate-homocysteine S-methyltransferase	58	92	82	90422	111106	114846	1	46	73	95	68	108393	116349	104623	1	48	0.4150015106720468	1.0
	830643	829972		-	ybiH	b0796	DUF1956 domain-containing tetR family putative transcriptional regulator	21	16	13	33777	19579	19007	0	35	12	19	12	17862	23813	18579	0	29	0.41530587059224644	1.0
	2705309	2704335		-	lepB	b2568	leader peptidase (signal peptidase I)	13	21	13	21067	26282	19313	0	22	8	23	9	13097	28404	13668	0	18	0.4153234748371858	1.0
	1122607	1121561		-	pyrC	b1062	dihydro-orotase	13	14	11	21327	17265	15803	0	17	17	16	12	25367	19964	18928	0	20	0.41571523029767704	1.0
	4139708	4139046		-	fsaB	b3946	fructose-6-phosphate aldolase 2	23	26	27	36139	31645	37676	1	53	20	20	23	29875	24577	35493	1	45	0.4157492059790704	1.0
2508474	2509630	2510886	2510972	+	yfeO	b2389	putative ion channel protein	263	389	330	406177	466884	461795	9	353	342	354	343	502561	433505	521702	11	386	0.41581076737421974	1.0
574610			575839	+	-	predicted RNA	antisense: insH1	29558	33330	31127	45521482	39922478	43436578	945	34926	28857	32963	27003	42379516	40343919	40985170	974	33525	0.41596357291014696	1.0
	4291512	4293170		+	nrfE	b4074	heme lyase (NrfEFG) for insertion of heme into c552, subunit NrfE	13	19	25	20479	23560	36082	0	16	14	20	13	21610	25270	20664	0	13	0.41611609886440803	1.0
	4200281	4200553		+	hupA	b4000	HU, DNA-binding transcriptional regulator, alpha subunit	14	11	14	23083	14189	19750	1	69	15	20	12	22506	25107	19661	2	82	0.41617616004804137	1.0
	1374090	1374932		+	ycjP	b1312	inner membrane putative ABC superfamily sugar transporter permease	2	4	3	3253	5750	5094	0	5	0	6	6	563	7506	10415	0	7	0.41618432189105375	1.0
	2695543	2691656		-	purL	b2557	phosphoribosylformyl-glycineamide synthetase	45	75	67	70020	90206	94756	0	21	49	70	46	73360	85779	70202	0	19	0.41719696329759864	1.0
	1509286	1509462		+	hicA	b4532	mRNA interferase toxin of the HicAB toxin-antitoxin system	1	1	0	1989	2075	1222	0	9	1	0	2	1605	771	4413	0	12	0.41775955299627926	1.0
837925	837925	837665		-	ybiJ	b0802	DUF1471 family putative periplasmic protein	44	66	48	68705	79665	68326	7	276	67	66	47	98744	81952	72801	9	323	0.41842406976291585	1.0
	2408862	2409461		+	yfbR	b2291	5'-nucleotidase	39	31	18	60780	38042	26298	1	69	30	24	20	45261	30576	31751	1	59	0.4184418327450011	1.0
	3812731	3813951		+	dfp	b3639	fused 4'-phosphopantothenoylcysteine decarboxylase/phosphopantothenoylcysteine synthetase, FMN-binding	17	43	29	26942	51953	40830	0	32	30	33	34	44134	40537	52477	1	37	0.41853946945046455	1.0
	372115	372924		+	mhpD	b0350	2-keto-4-pentenoate hydratase	1	6	6	2128	8091	9173	0	7	2	8	7	3961	10088	10912	0	10	0.41866547596832454	1.0
	794773	794922		+	acrZ	b0762	AcrAB-TolC efflux pump accessory protein, membrane-associated	2	4	3	3677	5410	4970	0	31	2	3	2	2971	4534	3340	0	24	0.4189946178373186	1.0
	2412089	2411439		-	yfbT	b2293	sugar phosphatas	14	22	12	22175	26691	17678	0	34	13	26	16	20508	32592	24816	1	39	0.41900604330311103	1.0
	2920746	2919406		-	gudX	b2788	glucarate dehydratase-related protein, substrate unknown	32	38	17	49428	45610	24713	0	29	22	34	18	32445	42072	27974	0	25	0.4194604812962921	1.0
	3816676	3817539		+	yicC	b3644	UPF0701 family protein	32	52	37	50441	62828	51878	1	63	31	47	30	45543	57566	45804	1	57	0.41983604313281336	1.0
	3604243	3602750		-	ftsY	b3464	Signal Recognition Particle (SRP) receptor	20	30	22	31320	37096	31954	0	22	30	32	20	44842	39271	31202	0	25	0.4198640973881656	1.0
	1189776	1188316		-	phoQ	b1129	sensory histidine kinase in two-component regulatory system with PhoP	14	20	19	22460	25037	26752	0	16	27	20	14	39702	25249	21414	0	19	0.42022600066037724	1.0
	890913	891200		+	ybjC	b0850	DUF1418 family protein	1	9	7	2145	10956	10238	0	27	6	5	1	8922	6805	2878	0	21	0.4209681150085619	1.0
3782562	3782562	3781741		-	cysE	b3607	serine acetyltransferase	197	221	218	304628	264795	304731	9	354	200	197	161	293946	241938	245682	9	316	0.4210216091470324	1.0
	1714377	1714982		+	gstA	b1635	glutathionine S-transferase	101	127	128	156826	153225	178944	7	268	94	113	90	138942	138868	137491	6	228	0.4211678163555875	1.0
	441101	440202		-	ispA	b0421	geranyltranstransferase	45	30	36	69951	36579	51432	1	58	38	38	25	55951	47060	38956	1	52	0.4212420846000527	1.0
	3813932	3814387		+	dut	b3640	deoxyuridinetriphosphatase	19	20	24	29910	24336	34398	1	64	15	23	15	23403	28779	23613	1	55	0.4217383413555291	1.0
	755560	755907		+	sdhD	b0722	succinate dehydrogenase, membrane subunit, binds cytochrome b556	2	3	2	3902	4035	2980	0	10	2	2	0	4123	2794	1151	0	7	0.42177089986232785	1.0
	1456430	1457500		+	paaE	b1392	ring 1,2-phenylacetyl-CoA epoxidase, NAD(P)H oxidoreductase component	5	6	1	8210	7499	1973	0	5	4	7	4	6531	9543	6838	0	7	0.422307827638043	1.0
	2218557	2217400		-	yehY	b2130	inner membrane putative ABC superfamily transporter permease	4	4	1	6618	5546	2741	0	4	4	6	3	6215	8418	4902	0	5	0.4224684698440718	1.0
	4289245	4289811		+	nrfB	b4071	nitrite reductase, formate-dependent, penta-heme cytochrome c	21	20	9	33846	24921	12880	1	42	24	26	9	36321	32316	14767	1	49	0.4227691718955713	1.0
	1255952	1253085		-	ycgV	b1202	putative adhesin	142	175	165	219146	210562	231227	2	76	172	201	165	253372	246048	250505	2	87	0.4228271077749109	1.0
	2463012	2464070		+	yfdF	b2345	uncharacterized protein	70	76	59	108548	91077	83155	2	89	64	64	54	94911	78896	83042	2	80	0.4228347717967149	1.0
4027608	4024821	4024333	4017307	-	rfaH	b3842	transcription antitermination protein	380	422	401	586416	506383	559631	30	1126	370	402	378	543510	492210	573761	31	1097	0.4231150524855569	1.0
	3167718	3166111		-	ygiS	b3020	putative inner membrane ABC superfamily transporter permease	111	181	130	171508	217156	181818	3	118	121	201	147	178218	247067	223918	3	134	0.42323949330160826	1.0
2558679	2558679	2557318	2557318	-	eutB	b2441	ethanolamine ammonia-lyase, large subunit, heavy chain	3844	4839	3577	5921102	5796284	4992296	111	4089	4029	5020	3662	5917332	6144768	5558391	125	4312	0.4238975633439138	1.0
	4016169	4015354		-	ysgA	b3830	putative carboxymethylenebutenolidase	104	140	128	161628	168381	179473	5	208	114	106	88	167973	129918	134577	5	176	0.4240772890637841	1.0
	1792731	1792267		-	nlpC	b1708	putative C40 clan peptidase lipoprotein	26	32	27	41123	39152	38906	2	85	39	38	20	57778	47598	30931	2	97	0.4244657445576098	1.0
	2143266	2146583		+	yegE	b2067	putative diguanylate cyclase	69	122	84	106385	146719	118602	1	37	101	114	90	148488	140000	137552	1	42	0.42451137709932724	1.0
	2800723	2800968		+	nrdH	b2673	hydrogen donor for NrdEF electron transport system; glutaredoxin-like protein	1	2	2	1808	2844	3591	0	11	1	1	0	2552	2037	1264	0	7	0.4245361337327207	1.0
2726188			2726069	-	rrfG	b2588	5S ribosomal RNA of rrnG operon	3	4	5	5130	5362	7546	1	50	6	5	4	9921	6600	6777	1	64	0.4246583909059597	1.0
	6459	5683		-	yaaA	b0006	peroxide resistance protein, lowers intracellular iron	115	123	122	178361	148325	170324	5	213	87	103	109	129030	126310	166922	5	181	0.4249369277048313	1.0
1930563			1930678	+	-	predicted RNA	antisense: yebG	1299	1581	1314	2001453	1894848	1834604	447	16468	1185	1637	1014	1741512	2004648	1540465	446	15191	0.42518770739222966	1.0
	1331048	1333645		+	topA	b1274	DNA topoisomerase I, omega subunit	34	39	47	53123	47767	66179	0	21	35	38	34	51613	47258	51857	0	19	0.4252209005999384	1.0
	904467	903952		-	ybjP	b0865	lipoprotein	18	27	22	27747	33265	30748	1	59	21	21	13	32001	25893	20795	1	50	0.42567220044297094	1.0
	738092	738853		+	ybfD	b0706	H repeat-associated putative transposase	3	6	6	5442	7601	8867	0	9	6	9	4	9050	11425	7423	0	12	0.42671538631845995	1.0
	3611865	3612914		+	yhhT	b3474	UPF0118 family putative transporter	33	40	34	50977	48441	48608	1	46	23	34	36	34118	42016	55172	1	41	0.4271243379573663	1.0
	1383961	1382963		-	ycjW	b1320	LacI family putative transcriptional repressor	3	8	8	5364	10119	12542	0	9	7	10	7	10647	12522	11322	0	11	0.4272035494320554	1.0
	3388188	3386221		-	aaeB	b3240	p-hydroxybenzoic acid efflux system component	50	66	52	78473	79535	73148	1	39	41	55	52	60664	67937	80373	1	35	0.42743612510055407	1.0
490271	490271	490110	485736	-	ybaM	b0466	DUF2496 family protein	61	76	67	93960	91792	94599	15	576	52	73	58	76852	89635	88328	15	524	0.4275351419996277	1.0
	1181725	1181264		-	ymfA	b1122	DUF3592 family inner membrane protein	75	74	59	115824	89015	82396	5	207	82	76	62	121149	93533	95097	6	223	0.4277638921240454	1.0
	2915057	2917813		+	barA	b2786	hybrid sensory histidine kinase, in two-component regulatory system with UvrY	99	94	85	153720	112841	118644	1	46	83	93	69	122165	114793	105826	1	41	0.42777028765955993	1.0
	791029	789983		-	galT	b0758	galactose-1-phosphate uridylyltransferase	70	92	76	107977	110936	107257	2	103	72	87	57	106907	106692	87630	2	95	0.4278142277225249	1.0
	2106057	2105065		-	wbbI	b2034	d-Galf:alpha-d-Glc beta-1,6-galactofuranosyltransferase	21	26	28	33050	32224	40236	0	35	31	24	29	45824	30590	44426	1	40	0.4280283929407481	1.0
4508617	4508617	4507466	4507464	-	insI1	b4284	IS30 transposase	429	487	408	661714	583945	569961	14	525	433	503	441	636142	616257	669949	16	556	0.4281115447442418	1.0
	346484	346759		+	yahO	b0329	periplasmic protein, function unknown, YhcN family	2	1	0	3434	1844	1164	0	7	3	1	1	4858	1669	1762	0	10	0.4284265778703915	1.0
	2537749	2538483		+	yfeS	b2420	WGR domain protein	128	149	125	198148	178930	174651	6	250	111	106	117	164011	129939	177852	6	213	0.4285396077960281	1.0
	4564689	4563922		-	yjiL	b4334	putative ATPase, activator of (R)-hydroxyglutaryl-CoA dehydratase	40	72	52	62363	87198	73247	2	96	39	63	42	58632	77453	65256	2	87	0.4286875016421059	1.0
	2740069	2738948		-	tyrA	b2600	fused chorismate mutase T/prephenate dehydrogenase	72	109	136	111593	130910	190595	3	128	71	122	78	105473	149607	118806	3	111	0.42873657126161746	1.0
	1500449	1499469		-	ydcK	b1428	uncharacterized protein	70	103	86	109050	123438	121369	3	120	58	91	82	86031	111892	124467	3	109	0.428746732756944	1.0
	1133802	1134557		+	flgF	b1077	flagellar component of cell-proximal portion of basal-body rod	23	16	19	36753	20280	27330	0	37	30	25	14	45397	30668	21362	1	42	0.42877406374581534	1.0
4107935			4107915	-	-	predicted RNA	antisense: pfkA	211	224	250	326077	269402	348897	403	14990	201	215	188	296157	264280	286304	389	13440	0.4288377486172612	1.0
	4207532	4205943		-	purH	b4006	fused IMP cyclohydrolase/phosphoribosylaminoimidazolecarboxamide formyltransferase	21	24	21	33258	29454	29510	0	19	11	21	23	17238	26777	35162	0	16	0.4290886955801078	1.0
	1618908	1618243		-	marC	b1529	UPF0056 family inner membrane protein	36	33	49	56618	40424	68846	2	83	47	53	34	69672	66084	51648	2	93	0.42932904032337715	1.0
424918	424918	424337		-	acpH	b0404	acyl carrier protein (ACP) phosphodiesterase; ACP hydrolyase	118	159	136	182306	191343	191132	8	323	182	173	106	267716	212670	160912	10	367	0.4295032568445985	1.0
	3858404	3856911		-	yidJ	b3678	sulfatase/phosphatase superfamily protein	73	104	82	113358	125159	115490	2	78	66	100	66	97967	123126	101439	2	71	0.42978890675731857	1.0
2811201			2811112	-	-	predicted RNA	antisense: mprA	1161	1009	1038	1788613	1209167	1448740	441	16468	778	812	739	1143084	994920	1122042	349	12074	0.43014231923419527	1.0
	4433056	4432091		-	ytfF	b4210	DMT transporter family inner membrane protein	29	46	36	45855	55138	51399	1	52	38	34	24	56625	42539	36898	1	46	0.43015357484317374	1.0
	1976255	1975329		-	motB	b1889	protein that enables flagellar motor rotation	12	17	27	18498	21001	38832	0	28	12	19	15	18997	23678	23508	0	23	0.4302835151103258	1.0
	2152472	2151711		-	yegK	b2072	ser/thr phosphatase-related protein	10	7	13	15634	8853	18165	0	18	10	13	12	15855	16236	18326	0	22	0.4309665739923633	1.0
	605886	605518		-	ybdF	b0579	DUF419 family protein	12	6	4	19025	8166	5936	0	29	15	8	4	22711	9939	7527	1	36	0.431254884050223	1.0
	2887219	2884553		-	ygcB	b2761	R-loop helicase-annealase Cas3 needed for Cascade anti-viral activity	33	82	66	51358	98911	92932	0	30	67	80	52	99393	98231	80408	1	34	0.43153414889962116	1.0
	1202933	1202259		-	cohE	b1145	e14 prophage; repressor protein phage e14	9	11	9	14509	14169	13714	0	20	11	12	11	17170	15472	17472	0	24	0.4315415631235918	1.0
4408167			4407872	-	-	predicted RNA	antisense: rnr	2802	3650	2743	4316707	4372185	3828412	384	14096	4117	4491	2563	6046670	5497325	3890936	508	17381	0.43175687368071425	1.0
	1952266	1952661		+	yecN	b1869	MAPEG family inner membrane protein	14	10	17	22374	12535	23747	1	49	11	18	19	16828	22398	29509	1	57	0.43189719461169124	1.0
	103155	103985		+	ftsQ	b0093	divisome assembly protein, membrane anchored protein involved in growth of wall at septum	8	10	7	13462	12277	10940	0	14	7	11	12	11296	13788	19033	0	17	0.4319669687841908	1.0
2518231			2518156	-	alaW	b2397	Ala tRNA	0	0	0	1245	517	0	0	7	1	0	0	1997	537	0	0	11	0.43254037631352626	1.0
	3068080	3067340		-	yggE	b2922	oxidative stress defense protein	21	42	22	32548	50952	31277	1	51	28	40	26	41743	49027	40317	1	58	0.43292898164780136	1.0
	3526149	3525589		-	nudE	b3397	adenosine nucleotide hydrolase; substrates include Ap3A, Ap2A, ADP-ribose, NADH	59	59	77	91296	71151	108174	4	160	53	75	48	78790	92684	74066	4	145	0.4329943755935796	1.0
	4330502	4332004		+	proP	b4111	proline/glycine betaine transporter	35	67	46	55320	81291	65378	1	44	38	51	41	56284	62539	62718	1	40	0.4336240112006096	1.0
	215269	215979		+	nlpE	b0192	lipoprotein involved with copper homeostasis and adhesion	76	90	78	118134	108193	109619	4	157	92	97	65	136125	119709	99729	4	166	0.43369593494502917	1.0
	2800965	2801375		+	nrdI	b2674	NrdEF cluster assembly flavodoxin	4	10	5	6428	12494	7728	0	21	6	11	6	9981	13837	9185	0	26	0.43382516144621336	1.0
	739507	740925		+	phr	b0708	deoxyribodipyrimidine photolyase, FAD-binding	62	70	61	95751	84912	85434	1	62	51	97	66	76229	119278	101386	2	69	0.43398228736141775	1.0
	997512	996937		-	ssuE	b0937	NAD(P)H-dependent FMN reductase	34	35	28	53010	42275	39311	2	77	21	57	32	31173	70088	49947	2	87	0.43415443457541436	1.0
	1223264	1223449		+	ymgJ	b4594	uncharacterized protein	4	4	4	6220	5376	6564	0	32	2	3	3	4380	4775	5102	0	25	0.4343509126655068	1.0
	919120	918128		-	ybjX	b0877	DUF535 family protein	162	186	164	249948	223934	229881	6	236	150	154	128	220312	189380	195612	5	203	0.4345325971364898	1.0
2715320	2715320	2714439	2712787	-	yfiE	b2577	putative DNA-binding transcriptional regulator	188	214	213	289756	257030	298464	8	319	155	157	221	227723	192875	335572	8	285	0.4351998508095147	1.0
	309332	306807		-	ecpC	b0291	ECP production outer membrane protein	86	105	96	133846	126058	134794	1	52	101	138	95	148642	169501	144644	1	61	0.4357780652487506	1.0
	3453270	3452959		-	rpsJ	b3321	30S ribosomal subunit protein S10	41	48	45	63419	58309	63380	5	197	53	61	39	77894	75804	60546	6	228	0.43582936603590516	1.0
	214833	215255		+	arfB	b0191	alternative stalled-ribosome rescue factor B; peptidyl-tRNA hydrolase, ribosome-attached	4	7	7	7579	9459	10164	0	21	5	2	6	8777	3558	9778	0	17	0.43646140740289596	1.0
	1506781	1508742		+	ydcP	b1435	putative peptidase	34	42	30	53547	51469	42721	0	25	34	52	31	50273	64619	48194	0	27	0.4365894429095929	1.0
	467412	468230		+	cof	b0446	thiamine pyrimidine pyrophosphate hydrolase; HMP-PP phosphatase	8	14	13	13107	17442	18652	0	20	6	26	10	9187	32352	16233	0	23	0.4365934957024719	1.0
	693378	692338		-	ybeZ	b0660	PhoH-like heat shock protein	13	12	14	21422	14502	20584	0	18	14	23	10	21781	28241	16172	0	21	0.4366159251963153	1.0
1270393			1270460	+	rdlC	b4424	-	25	27	21	38761	33326	30592	13	503	32	30	21	47583	37155	32554	16	574	0.43699519599841924	1.0
	2362211	2361429		-	rhmR	b2248	putative DNA-binding transcriptional regulator for the rhm operon	11	15	14	18004	18082	20138	0	23	10	23	14	15223	28213	22426	0	28	0.43700810562770553	1.0
	4533183	4532437		-	yjhP	b4306	putative methyltransferase	3	15	11	6116	18402	16604	0	18	10	8	15	14728	10781	23159	0	21	0.4373278970421194	1.0
	638945	639508		+	ahpC	b0605	alkyl hydroperoxide reductase, C22 subunit	33	26	31	51418	31318	43621	1	74	18	32	28	26528	40240	42681	1	64	0.4374169315708224	1.0
	4067194	4065809		-	yihP	b3877	putative transporter	33	42	53	51955	50694	74783	1	42	50	53	42	74274	65836	63747	1	49	0.4375928025184553	1.0
	1979753	1980181		+	uspC	b1895	universal stress protein	18	25	29	29096	30019	41392	2	78	16	13	30	24615	16285	45551	1	67	0.43934396152149835	1.0
	368420	367587		-	mhpR	b0346	mhp operon transcriptional activator	9	6	2	15357	7540	3195	0	10	1	5	8	2108	6933	12151	0	8	0.4398102175566639	1.0
	2483339	2482176		-	emrK	b2368	EmrKY-TolC multidrug resistance efflux pump, membrane fusion protein component	1	8	9	2976	9752	12864	0	7	2	5	6	3449	7074	10240	0	5	0.4399991315891687	1.0
	4181245	4185273		+	rpoB	b3987	RNA polymerase, beta subunit	99	104	105	153659	125153	147444	0	35	99	95	70	146405	116660	107344	0	30	0.44003279641677207	1.0
	2432942	2431674		-	folC	b2315	bifunctional folylpolyglutamate synthase/ dihydrofolate synthase	21	27	28	32505	33204	39410	0	27	30	26	27	45312	32288	42341	0	31	0.4400625241396631	1.0
	1772512	1773777		+	ydiN	b1691	MFS transporter superfamily protein	3	4	1	5208	5396	2353	0	3	4	2	4	6591	3593	6489	0	4	0.4402841556217399	1.0
	3286270	3287025		+	agaI	b3141	galactosamine-6-phosphate isomerase	16	18	11	26077	22308	16068	0	28	11	13	12	17178	16880	19696	0	23	0.44035316518957557	1.0
	52430	51609		-	rsmA	b0051	16S rRNA m(6)A1518, m(6)A1519 dimethyltransferase, SAM-dependent	36	37	27	55770	45304	37907	1	56	45	49	18	66154	60459	28218	1	62	0.4404525905248269	1.0
	386971	387798		+	tauC	b0367	taurine transporter subunit	7	13	11	11161	16673	16043	0	17	9	9	7	13550	11149	10764	0	14	0.4405746034353984	1.0
189712			189847	+	tff	b4414	-	9	11	13	14189	13685	18949	3	114	8	18	13	12098	22525	20324	3	134	0.44068484905330235	1.0
	1633622	1634212		+	pinQ	b1545	Qin prophage; putative site-specific recombinase	25	34	29	39747	41908	41730	1	69	24	22	28	36321	27435	42908	1	60	0.44090302062416437	1.0
	2674688	2673816		-	yphB	b2544	mutarotase superfamily protein, YphB family	27	33	53	41711	40703	74304	1	59	34	33	32	50495	41584	49241	1	53	0.44091347912158135	1.0
	764180	765049		+	sucD	b0729	succinyl-CoA synthetase, NAD(P)-binding, alpha subunit	78	88	81	121171	105750	114028	3	130	84	97	79	124479	118896	120647	4	139	0.44117918182106197	1.0
	3288090	3288785		+	yraI	b3143	putative periplasmic pilin chaperone	21	36	22	33042	43466	31624	1	51	22	38	28	33043	46890	43387	1	59	0.4414521015583261	1.0
	400923	399829		-	ddlA	b0381	D-alanine-D-alanine ligase A	228	214	240	351626	256907	335149	7	287	203	224	180	298633	275168	274528	7	258	0.44155482161445625	1.0
	4389370	4386047		-	mscM	b4159	mechanosensitive channel protein, miniconductance	147	196	191	227703	235402	267690	1	73	135	196	129	198377	240183	196632	1	63	0.4419185282279021	1.0
458203			457994	-	-	predicted RNA	antisense: clpX	2776	2755	2513	4276700	3300558	3506795	474	17593	2520	2637	2137	3701383	3227958	3244443	468	16148	0.44215088304383693	1.0
2600554			2600544	-	-	predicted RNA	antisense: bcp	128	129	127	198529	154525	178135	433	16096	101	120	104	148787	147881	158269	400	13785	0.44215741208855325	1.0
3204131	3204131	3203310	3201061	-	bacA	b3057	undecaprenyl pyrophosphate phosphatase	179	289	251	276691	346985	350293	10	394	211	219	193	310817	269140	293981	10	354	0.4423318973924845	1.0
	1727837	1728244		+	gloA	b1651	glyoxalase I, Ni-dependent	4	1	4	6514	1912	5862	0	11	1	3	2	2903	3827	4431	0	9	0.4423736603212993	1.0
	1677903	1676371		-	pntA	b1603	pyridine nucleotide transhydrogenase, alpha subunit	4	8	5	7553	10677	8347	0	5	7	3	4	10365	4782	6498	0	4	0.4425475632741862	1.0
	1037740	1039284		+	cbdA	b0978	cytochrome bd-II oxidase, subunit I	15	23	17	24104	28018	24407	0	16	16	14	15	24752	17170	22845	0	13	0.4429615819891405	1.0
	695101	696276		+	ubiF	b0662	2-octaprenyl-3-methyl-6-methoxy-1,4-benzoquinol oxygenase	158	239	244	243857	287321	340830	6	247	174	206	181	256497	252564	274851	6	222	0.4437820306219658	1.0
	2765153	2763537		-	yfjL	b2628	CP4-57 putative defective prophage, DUF4297/DUF1837 polymorphic toxin family protein	140	172	139	215686	206751	195128	3	127	172	173	152	253995	211991	232065	4	143	0.44386545377211517	1.0
	614157	618038		+	entF	b0586	enterobactin synthase multienzyme complex component, ATP-dependent	66	78	58	102984	94086	81289	0	23	62	62	57	91359	75917	86636	0	21	0.44417234046911963	1.0
	3492568	3493749		+	tsgA	b3364	putative transporter	96	163	130	149247	195841	182032	4	148	145	155	126	214275	189982	192341	4	168	0.44456199575638133	1.0
	796554	797612		+	modC	b0765	molybdate transporter subunit	187	221	211	288224	265666	294641	7	267	182	176	182	268297	215811	277346	6	239	0.4449988598482525	1.0
	2768665	2769486		+	yfjQ	b2633	CP4-57 prophage; uncharacterized protein	18	25	18	27738	31019	25679	0	34	18	18	15	26639	22992	22801	0	29	0.44505875718586163	1.0
	720583	720840		+	ybfK	b4590	uncharacterized protein	0	0	0	856	0	949	0	2	0	1	0	0	1719	915	0	3	0.44534770529980433	1.0
3719044	3719044	3718334	3717300	-	yiaF	b3554	barrier effect co-colonization resistance factor; DUF3053 family lipoprotein	294	313	329	453607	375289	459639	16	604	268	283	273	393792	347081	415300	15	542	0.44577087387742875	1.0
	311336	310746		-	ecpR	b0294	putative transcriptional regulator for the ecp operon	1	7	3	1938	8813	5069	0	8	2	4	1	4200	5242	2991	0	7	0.445804007645384	1.0
4214123	4214123	4213680	4213231	-	yjaB	b4012	putative acetyltransferase	162	274	271	250562	328555	378895	19	719	194	308	239	286253	377948	362805	22	771	0.44584729538074813	1.0
	4003193	4002813		-	yigG	b3818	PRK11371 family inner membrane protein	5	11	4	9223	13944	6770	0	26	8	8	9	11782	10364	14157	0	31	0.4459312645792743	1.0
	1885845	1886810		+	yeaX	b1803	putative YeaWX dioxygenase beta subunit, reductase component	138	197	160	213142	236259	223424	6	232	191	190	160	281625	233293	242951	7	261	0.4462285414248093	1.0
	3156623	3157450		+	dkgA	b3012	2,5-diketo-D-gluconate reductase A	40	38	38	62285	46025	54190	1	65	41	41	23	60894	50237	36191	1	59	0.44623295233623106	1.0
	1063775	1062855		-	cbpA	b1000	DnaK co-chaperone; curved DNA-binding protein	3	12	13	6073	15325	19346	0	14	8	18	9	11791	22270	14043	0	17	0.4464136421932805	1.0
	891967	892869		+	rimK	b0852	ribosomal protein S6 modification protein	39	49	46	61524	59595	65320	1	68	52	65	38	76571	80679	58077	2	79	0.44655858938474513	1.0
	583681	584430		+	appY	b0564	global transcriptional activator; DLP12 prophage	5	6	11	8894	7826	16233	0	14	3	5	9	5712	6883	14323	0	11	0.4467735825605705	1.0
	2133397	2132558		-	wcaA	b2059	putative glycosyl transferase	17	17	10	26933	21539	15201	0	25	6	13	17	9682	16979	26552	0	21	0.4472553181446415	1.0
	3263660	3262452		-	tdcD	b3115	propionate kinase/acetate kinase C, anaerobic	6	4	2	9257	5498	4178	0	5	3	0	6	5481	0	9508	0	4	0.44730958111788155	1.0
	363179	361926		-	lacY	b0343	lactose permease	37	28	28	57631	34476	39600	0	35	32	31	18	47831	38931	28506	0	30	0.4479700673958644	1.0
4270655	4270658	4271014	4273922	+	yjbR	b4057	DUF419 family protein	74	97	79	115314	116401	111146	8	320	96	76	86	141982	93703	131263	9	342	0.4482532184044007	1.0
	2419176	2418634		-	yfcD	b2299	putative NUDIX hydrolase	7	19	4	11524	22927	6448	0	25	10	13	10	15633	16271	16311	0	29	0.44916545788182605	1.0
1996832	1996832	1996110	1995783	-	sdiA	b1916	quorum-sensing transcriptional activator	215	254	228	332064	304627	318743	11	440	242	266	224	356736	325956	340797	13	471	0.4493902969719995	1.0
	3326935	3325001		-	ftsH	b3178	protease, ATP-dependent zinc-metallo	70	108	88	107881	129651	124002	1	62	83	129	80	122797	158266	122505	2	69	0.4497917532314924	1.0
	476371	475982		-	ybaZ	b0454	excision repair protein, alkyltransferase-like protein ATL	41	62	36	64059	74676	50780	4	161	51	51	52	76272	63077	79736	5	187	0.44989801012641306	1.0
	1310269	1309016		-	kch	b1250	voltage-gated potassium channel	94	182	135	146167	218592	189472	4	147	120	117	103	176528	143834	157117	3	126	0.45042242371519764	1.0
	1960062	1961795		+	argS	b1876	arginyl-tRNA synthetase	45	44	42	70427	53722	59788	0	35	52	60	40	76536	74283	61017	1	40	0.4506075193057425	1.0
696830			696756	-	glnW	b0668	Gln tRNA	2	3	4	3858	4559	5672	1	62	2	3	1	4354	4740	1953	1	49	0.45176124097475984	1.0
	3385538	3385801		+	yhcN	b3238	cadmium and peroxide resistance protein, stress-induced	14	21	14	22365	25826	20526	2	86	12	14	14	18084	17438	22260	2	72	0.4527436476969277	1.0
2700303	2700197	2700117	2700106	-	shoB	b4687	toxic membrane protein	43	46	43	67546	55560	60440	20	755	50	58	43	73608	71354	66233	25	869	0.4527852890380509	1.0
	4371025	4372671		+	groL	b4143	Cpn60 chaperonin GroEL, large subunit of GroESL	53	67	71	82609	81386	100140	1	53	63	70	76	93092	85900	115744	1	59	0.45295584310377357	1.0
	2737599	2737646		+	pheL	b2598	pheA gene leader peptide	6	6	8	9742	7697	11237	5	199	10	8	6	14745	10668	9394	7	241	0.4531129021985813	1.0
2634232	2634232	2635602	2644933	+	xseA	b2509	exonuclease VII, large subunit	917	1219	922	1413289	1461242	1287688	27	1011	1189	1220	900	1746302	1493866	1367472	32	1120	0.45321535279706804	1.0
1097652			1097565	-	serX	b1032	Ser tRNA	0	0	1	1012	68	2510	0	13	0	0	1	665	254	1526	0	9	0.45329960927568846	1.0
	3301276	3300752		-	yhbT	b3157	SCP-2 sterol transfer family protein	13	15	12	21344	18973	17323	0	36	9	12	11	14182	15833	18073	0	30	0.4534454937673719	1.0
	4366773	4365472		-	dcuA	b4138	C4-dicarboxylate antiporter	50	47	53	78361	56574	74948	1	53	58	49	28	85946	61039	43309	1	48	0.453650081019116	1.0
	1669699	1670952		+	ynfM	b1596	putative arabinose efflux transporter	229	201	205	354135	241533	287069	6	234	203	213	155	298181	261245	236322	6	211	0.4537410067369321	1.0
	3081635	3079644		-	tktA	b2935	transketolase 1, thiamine triphosphate-binding	55	59	45	85222	71035	63570	0	36	42	66	36	62551	81344	56097	0	33	0.4539585152491629	1.0
1269323			1269389	+	rdlA	b4420	-	3	1	1	5087	2034	1585	1	43	2	3	2	3722	4188	3175	1	55	0.4540792254829968	1.0
	798586	799581		+	pgl	b0767	6-phosphogluconolactonase	17	21	19	26215	25561	26521	0	26	17	24	7	25819	29713	11191	0	22	0.45411708795286654	1.0
	4009170	4010192		+	pldB	b3825	lysophospholipase L2	35	50	40	54066	60262	56692	1	55	47	45	45	69637	55373	68754	1	63	0.4542286371318666	1.0
	850450	850965		+	ompX	b0814	outer membrane protein X	82	92	100	127643	110439	139616	6	243	64	101	79	95022	123700	120769	6	219	0.45444440344303066	1.0
	1303834	1304742		+	oppC	b1245	oligopeptide transporter subunit	7	8	7	11472	10500	10725	0	11	10	6	10	15462	8348	15474	0	14	0.4548046512989253	1.0
	2425233	2424517		-	hisM	b2307	histidine/lysine/arginine/ornithine transporter subunit	14	17	18	22348	21484	25505	0	32	28	11	16	41598	13823	24616	1	37	0.4553355630566452	1.0
	3380191	3380589		+	yhcB	b3233	DUF1043 family inner membrane-anchored protein	9	2	5	15314	2688	7835	0	21	8	7	7	12218	9062	10633	0	26	0.45550683894366145	1.0
	4031161	4032492		+	pepQ	b3847	proline dipeptidase	37	46	62	57786	55743	87457	1	50	63	56	45	93801	69564	69617	1	58	0.4564549619285831	1.0
	3169676	3169284		-	ygiW	b3024	hydrogen peroxide and cadmium resistance periplasmic protein; stress-induced OB-fold protein	53	72	38	82583	86341	53125	5	188	50	59	36	74171	72437	55626	5	171	0.45681646137483045	1.0
	1925440	1926096		+	yobB	b1843	C-N hydrolase family protein	27	37	34	42810	45324	47494	1	68	35	33	38	51775	40438	59159	2	76	0.4573632032958569	1.0
	1377884	1380151		+	ycjT	b1316	putative family 65 glycosyl hydrolase	13	32	24	21067	39369	33861	0	13	20	19	17	30396	24039	27250	0	12	0.45754421104509496	1.0
	2814733	2814218		-	luxS	b2687	S-ribosylhomocysteine lyase	102	88	111	157605	105648	155841	7	270	83	87	90	123070	107534	136618	6	237	0.45821711673397997	1.0
	833070	835220		+	dinG	b0799	ATP-dependent DNA helicase	23	24	24	36797	29120	33622	0	15	20	23	18	29644	28567	27930	0	13	0.45822363033171026	1.0
	4156850	4158223		+	argH	b3960	argininosuccinate lyase	22	32	23	34798	38580	32953	0	25	28	36	22	41752	44428	34473	0	29	0.45831532369564587	1.0
779920			778834	-	-	predicted RNA	antisense: ybgF tolB pal	29612	31442	28309	45604464	37660378	39504128	1017	37647	28258	31071	23647	41500085	38028319	35892070	1029	35394	0.4583685235280723	1.0
1298438	1298598	1299245	1299245	+	ychE	b1242	UPF0056 family inner membrane protein	137	195	171	211896	233966	239905	9	352	172	206	172	253876	252805	262351	11	395	0.4583737136774865	1.0
	2388635	2389057		+	yfbO	b2274	uncharacterized protein	16	14	22	25765	17054	30947	1	58	16	21	22	24214	26048	34525	1	66	0.45850421961049426	1.0
	4352584	4352880		+	yjdK	b4128	uncharacterized protein	27	12	12	42178	15169	16918	2	83	19	25	17	28919	30597	25828	2	95	0.4589181438341482	1.0
	3748577	3749239		+	sgbH	b3581	3-keto-L-gulonate 6-phosphate decarboxylase	1	5	1	2007	6193	1527	0	4	2	1	0	4337	1655	1264	0	3	0.4590087853601316	1.0
	684412	683477		-	rihA	b0651	ribonucleoside hydrolase 1	9	12	6	14466	15414	9355	0	13	9	12	11	14130	15245	16931	0	16	0.45906589040877327	1.0
	3712007	3710799		-	yhjX	b3547	pyruvate-inducible inner membrane protein, putative transporter	32	54	34	49835	64856	48402	1	44	27	48	31	40761	59151	48351	1	40	0.4591403521420882	1.0
	1579342	1577657		-	yddA	b1496	putative multidrug transporter subunit of ABC superfamily, membrane component/ATP-binding component	8	8	15	13497	10072	21847	0	8	6	12	8	9238	15429	12491	0	7	0.4591617342324978	1.0
	4313868	4314197		+	yjdP	b4487	putative periplasmic protein	11	18	13	17122	21763	19040	1	58	19	17	11	28159	20919	18161	1	67	0.45970190990927307	1.0
	1613251	1612325		-	glsB	b1524	glutaminase 2	94	134	132	144782	161610	184749	4	176	107	169	127	157692	207562	193213	5	200	0.46022344179169855	1.0
1159316			1157819	-	-	predicted RNA	antisense: ptsG	27473	27963	27159	42310391	33493480	37898926	681	25301	24416	26631	22101	35857351	32595210	33544809	658	22696	0.46031105323184607	1.0
	827252	826119		-	ybhS	b0793	inner membrane putative ABC superfamily transporter permease	18	19	22	28465	22954	31310	0	24	21	23	22	31702	28871	34098	0	27	0.4604362994255775	1.0
	507082	506603		-	ybaK	b0481	Cys-tRNA(Pro)/Cys-tRNA(Cys) deacylase	79	107	97	122555	128936	136504	7	269	74	81	90	109725	100000	136915	6	240	0.46061459445384556	1.0
	144577	145017		+	yadI	b0129	putative PTS Enzyme IIA	45	53	57	69562	64611	80637	4	162	60	74	45	88951	91482	68379	5	188	0.46072800554083576	1.0
3484490	3484490	3485359	3485831	+	prkB	b3355	putative phosphoribulokinase	297	348	314	458738	417040	438295	13	503	274	312	262	402476	382589	399136	13	453	0.4611431373836526	1.0
	712802	712038		-	ybfF	b0686	acyl-CoA esterase	21	33	23	32721	39642	32722	1	45	24	24	17	35425	29586	25846	1	39	0.4611546830320899	1.0
	973537	974322		+	smtA	b0921	putative S-adenosyl-L-methionine-dependent methyltransferase	12	13	11	19051	15577	15960	0	21	14	20	8	21021	25086	12718	0	24	0.4621291192911671	1.0
	1408050	1409033		+	ydaN	b1342	putative Zn(II) transporter	32	44	44	49645	53702	62075	1	56	30	44	33	44766	54418	51290	1	50	0.4626563206496415	1.0
	1930881	1932059		+	purT	b1849	phosphoribosylglycinamide formyltransferase 2	140	189	162	216153	227140	226628	5	189	180	194	163	265078	238139	248299	6	212	0.46268214776182187	1.0
	1355470	1354505		-	sapB	b1293	antimicrobial peptide transport ABC transporter permease	27	36	25	42317	44262	35521	1	42	23	28	24	33879	34361	37875	1	36	0.46273098555566744	1.0
	1104447	1104902		+	csgA	b1042	curlin subunit, amyloid curli fibers, cryptic	14	20	15	21924	25017	21567	1	50	18	23	15	27032	28227	23682	1	57	0.46310117963775677	1.0
	1821214	1819856		-	chbC	b1737	N,N'-diacetylchitobiose-specific enzyme IIC component of PTS	10	13	10	16075	15890	14317	0	11	9	10	7	14566	12472	10982	0	9	0.4631266947491446	1.0
847843			848020	+	-	predicted RNA	antisense: glnH	2507	3411	2629	3862432	4086695	3668763	594	21756	2692	3266	2761	3954866	3998323	4192027	661	22743	0.46328950792381407	1.0
859061	859061	857796	855944	-	ybiU	b0821	DUF1479 family protein	238	376	335	366914	451075	468425	9	338	249	290	287	366461	356108	435886	8	305	0.46363653860296256	1.0
888054			887976	-	rybB	b4417	-	19	20	14	30117	24690	20353	8	317	25	16	18	37798	19915	28506	10	363	0.46370662890846565	1.0
	4399252	4400202		+	miaA	b4171	delta(2)-isopentenylpyrophosphate tRNA-adenosine transferase	14	24	18	22495	29052	25530	0	27	16	16	14	23522	20601	21659	0	23	0.4639680985277902	1.0
[truncated: 2,693 more rows]
