# Supplementary material for: The DnaA Protein Is Not the Limiting Factor for Initiation of Replication in Escherichia coli
Source: PLOS journal article supplement (doi:10.1371/journal.pgen.1005276), 2015-06-05
Supplement: S11 (10.1371/journal.pgen.1005276.s011) [file journal.pgen.1005276.s011]

**Table S6: Replication periods determined by QPCR**

| Strain                        | <i>oriC/ter</i> ratio | Calculated replication period |
|-------------------------------|-----------------------|-------------------------------|
| Wild type                     | $3.72 \pm 0.25$       | $53 \pm 3$ min                |
| Low excess DnaA               | $3.77 \pm 0.17$       | $55 \pm 1$ min                |
| $\Delta dataA$                | $3.91 \pm 0.09$       | $55 \pm 1$ min                |
| Wild type (with empty vector) | $3.93^1$ (3.51-4.34)  | $57^1$                        |
| High excess DnaA              | $4.40^1$ (4.15-4.64)  | $67^{1,2}$                    |

$\pm$  represents the standard deviation.

<sup>1</sup> Average of two experiments.

<sup>2</sup> It is not known whether the replication period actually is longer in cells with ten-fold extra DnaA or whether this number is high because some cells suffer replication fork collapse
