# Supplementary material for: The DnaA Protein Is Not the Limiting Factor for Initiation of Replication in Escherichia coli
Source: PLOS journal article supplement (doi:10.1371/journal.pgen.1005276), 2015-06-05
Supplement: S13 (10.1371/journal.pgen.1005276.s013) [file journal.pgen.1005276.s013]

**Table S8 Verification of differentially expressed genes by RT-qPCR**

| Sample | Expression dnaA <sup>1,2</sup> | Expression pka <sup>1,2</sup> |
|--------|--------------------------------|-------------------------------|
| MG1655 | 1                              | 1                             |
| IF72   | 1.46 ± 0.023                   | 1.22 ± 0.055                  |

<sup>1</sup> Expression levels are normalized to the expression of rrsA

<sup>2</sup> The given values are the average expression in IF72 relative to MG1655.
